# Supplementary material for: DIBAL-H mediated triple and quadruple debenzylations of perbenzylated cyclodextrins
Source: Royal Society of Chemistry journal article supplement (doi:10.1039/b915450g), 2009-11-12

# **DIBAL-H mediated triple and quadruple debenzylations of perbenzylated cyclodextrins**

**Girish K. Rawal, Shikha Rani, Sandra Ward and Chang-Chun Ling\***

*Alberta Ingenuity Center for Carbohydrate Science,  
Department of Chemistry, University of Calgary, Calgary Alberta T2N 1N4 Canada.  
E-mail: ccling@ucalgary.ca*

## **Table of Contents**

|                                                                                                        |               |
|--------------------------------------------------------------------------------------------------------|---------------|
| <b>1. <math>^1\text{H}</math> and <math>^{13}\text{C}</math> spectra of synthesized compounds.....</b> | <b>S2-S58</b> |
|--------------------------------------------------------------------------------------------------------|---------------|

# <sup>1</sup>H NMR in CDCl<sub>3</sub>, 400 MHz

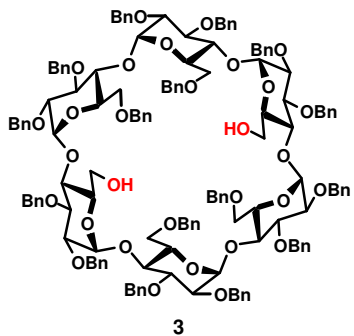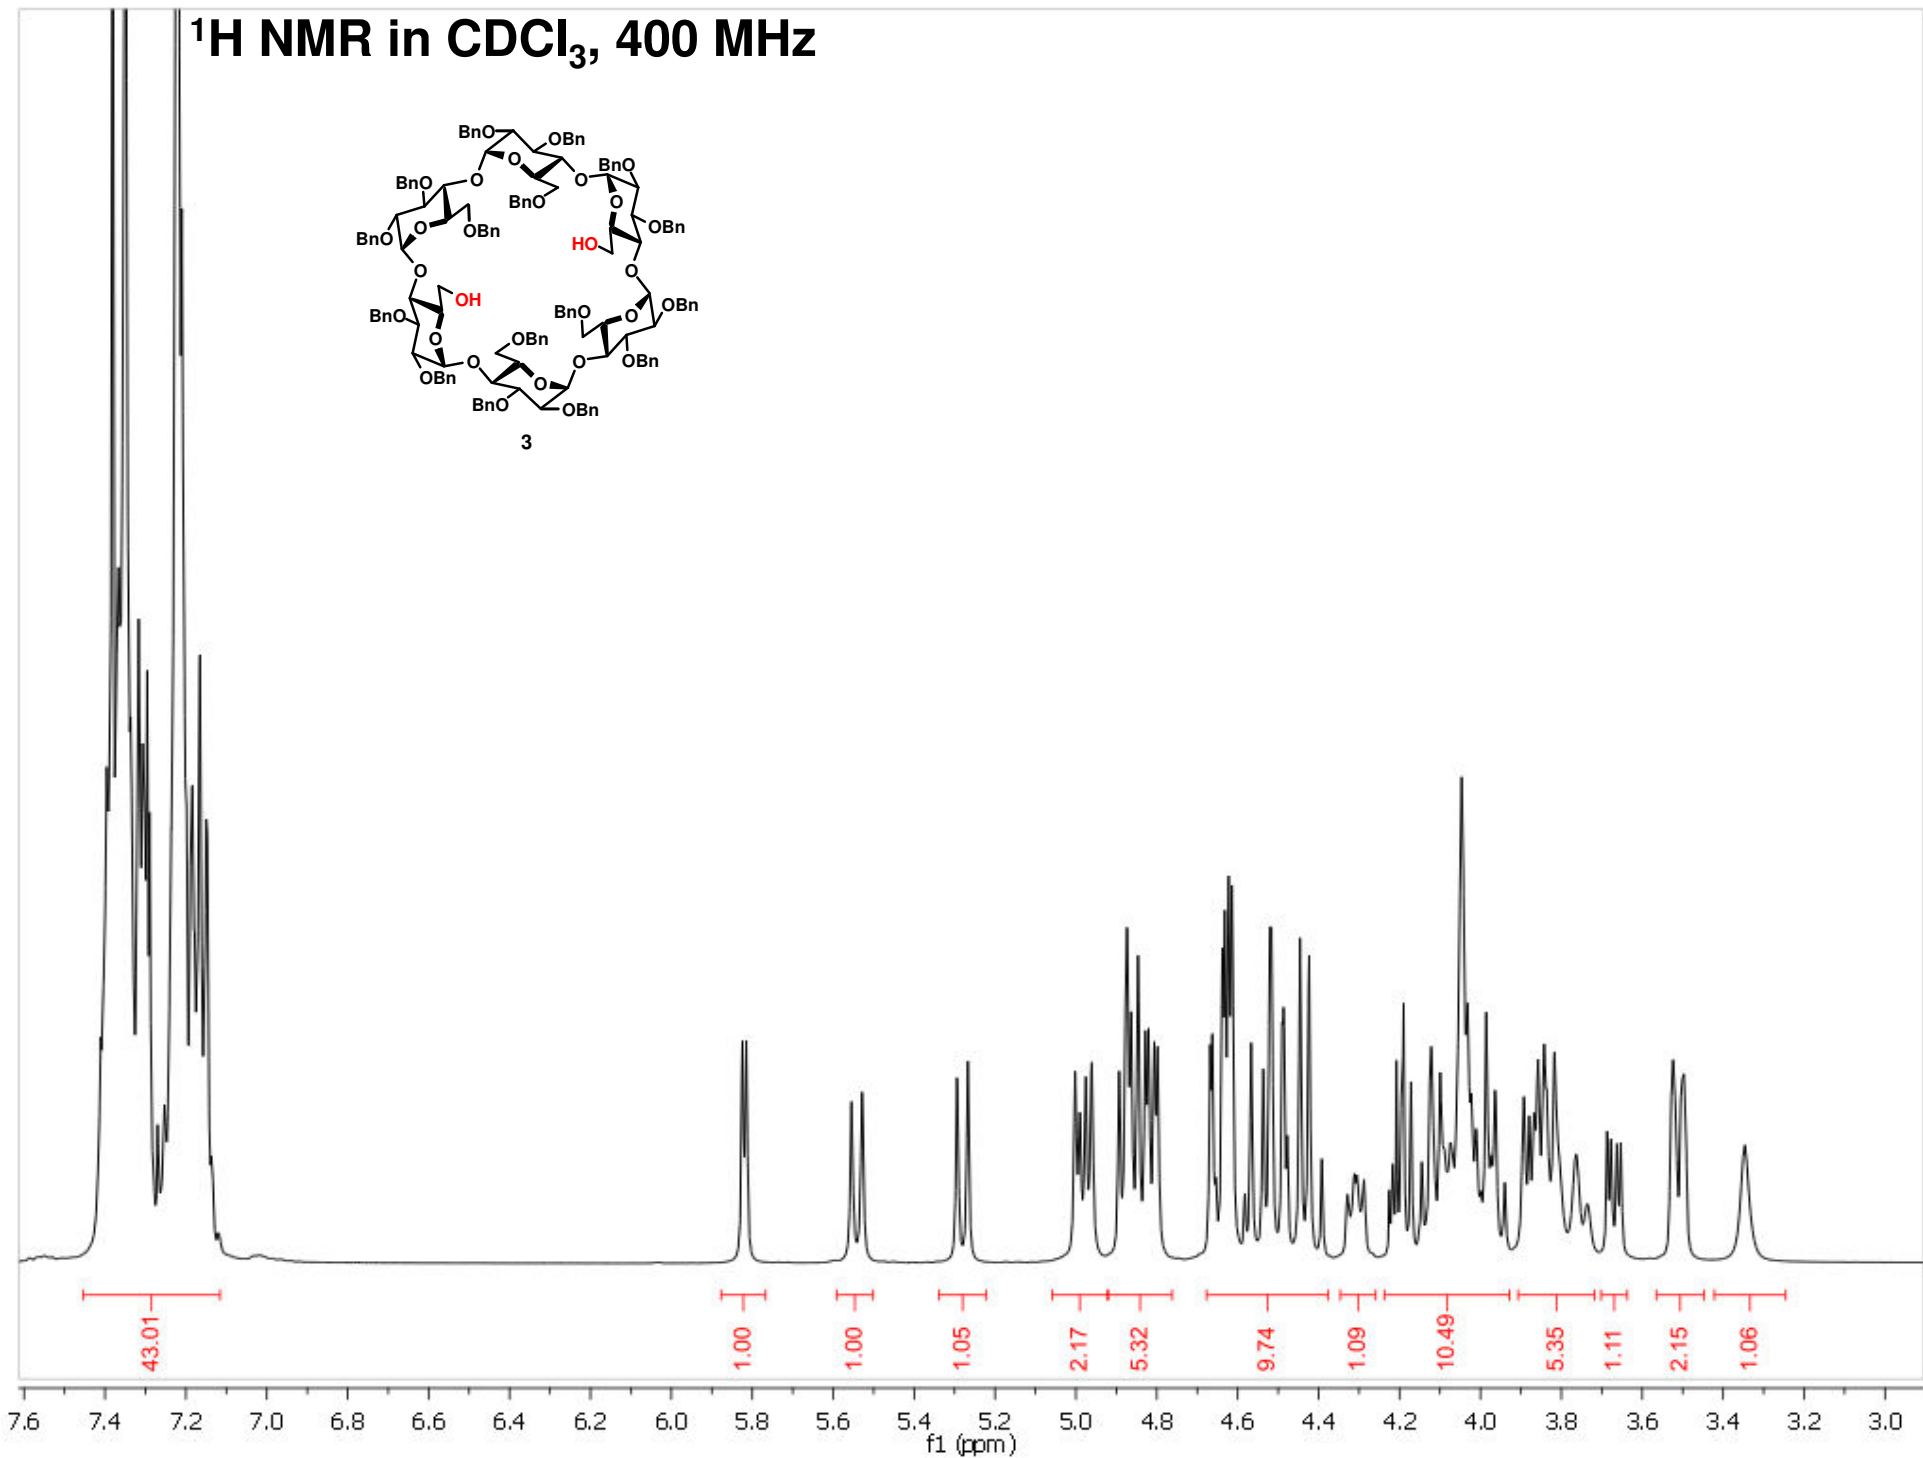

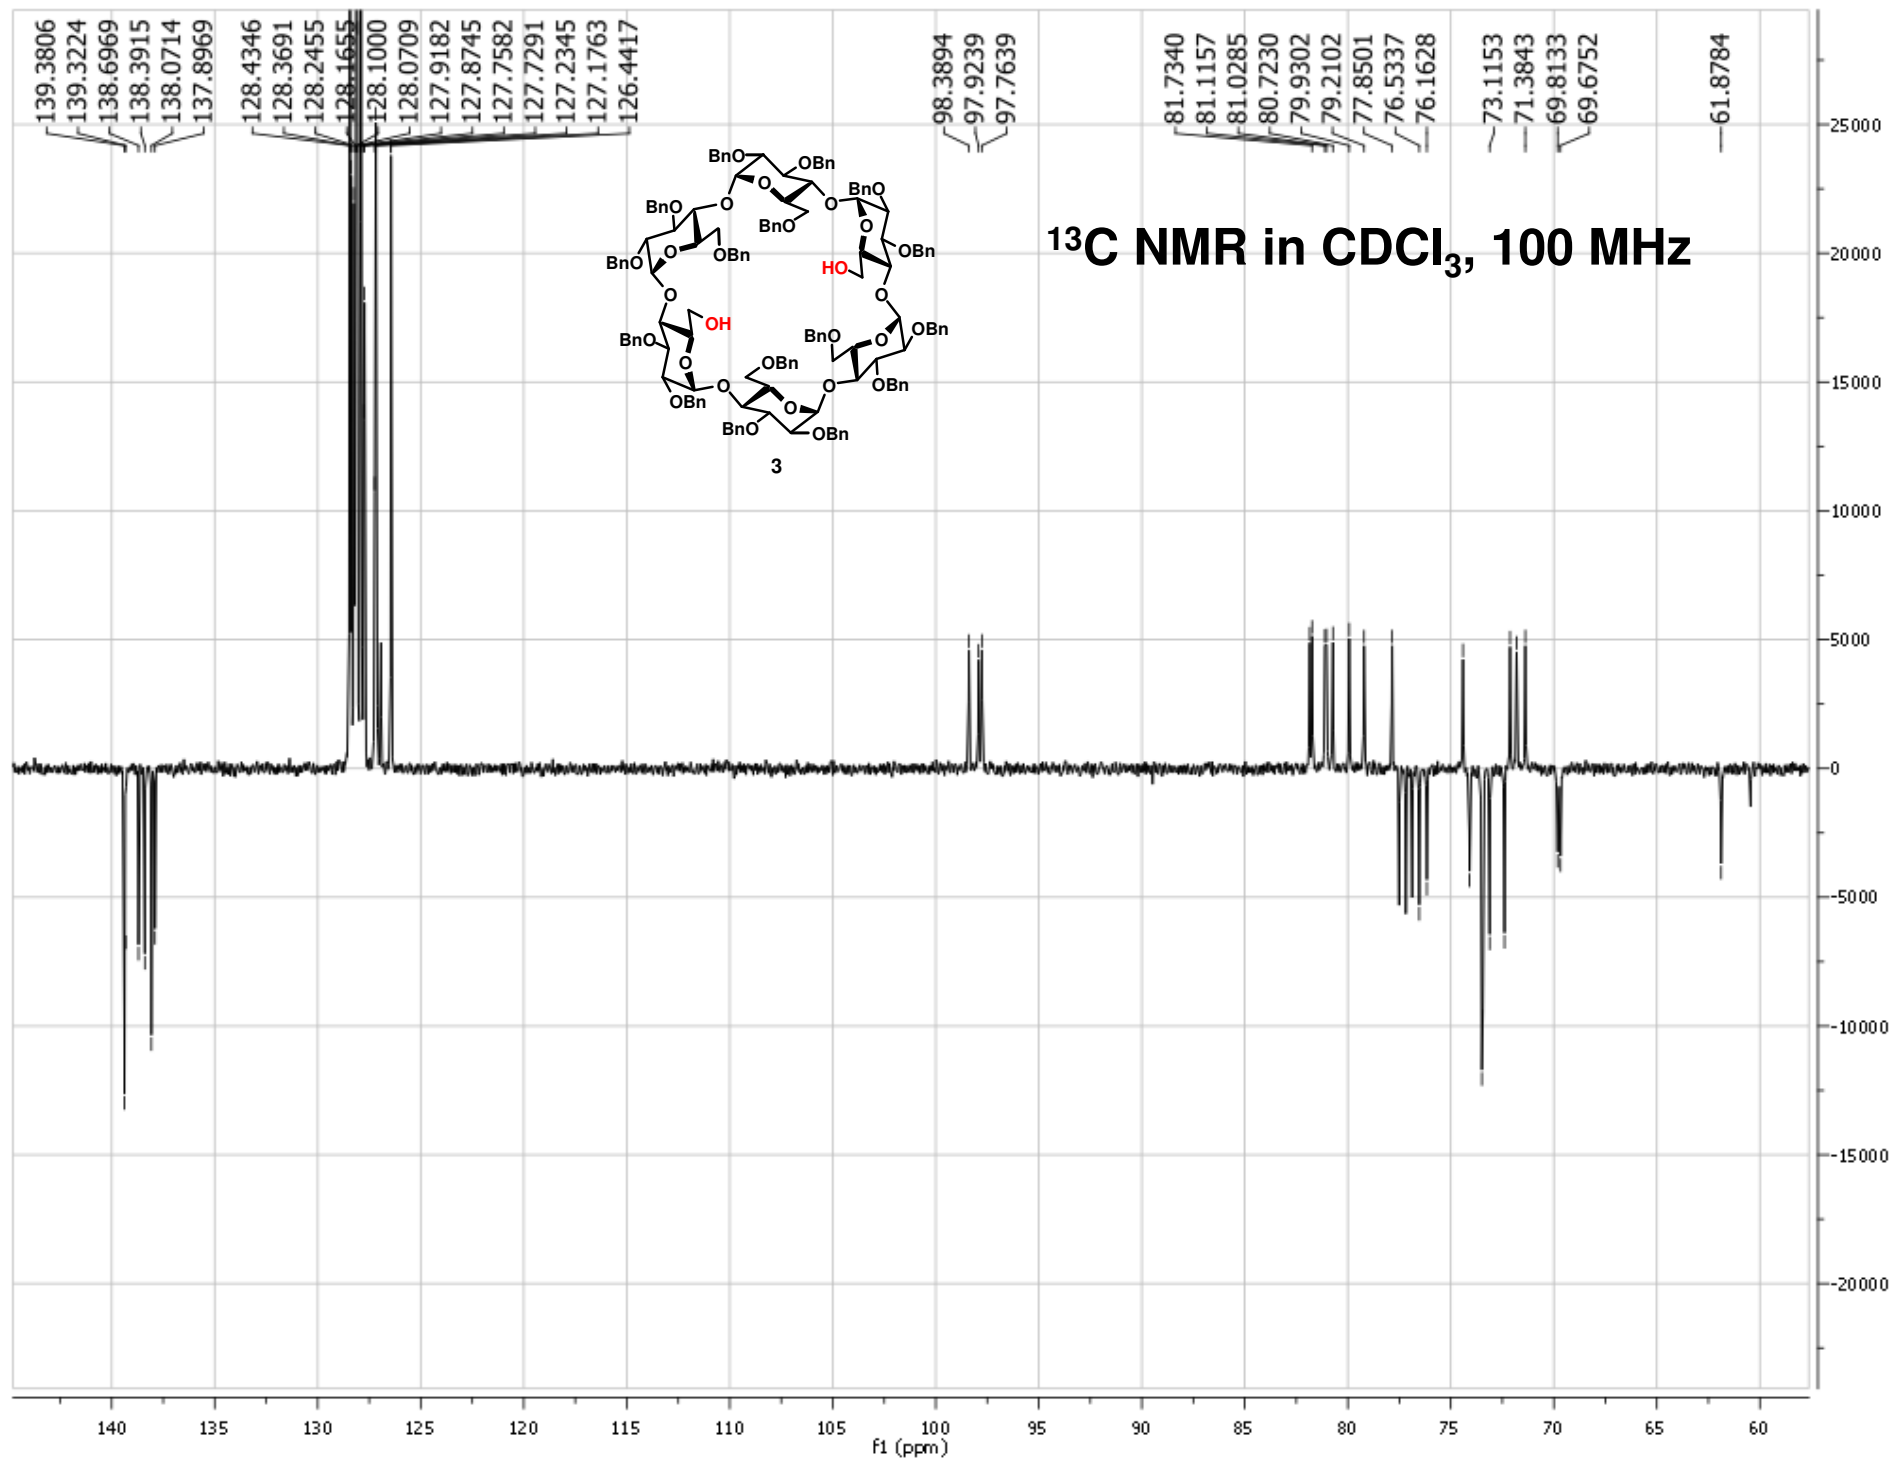

# <sup>1</sup>H NMR in CDCl<sub>3</sub>, 400 MHz

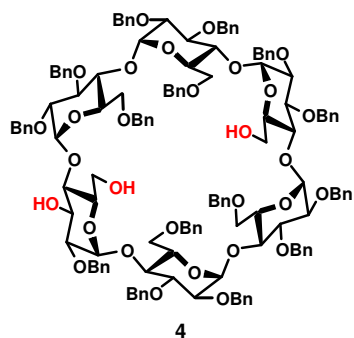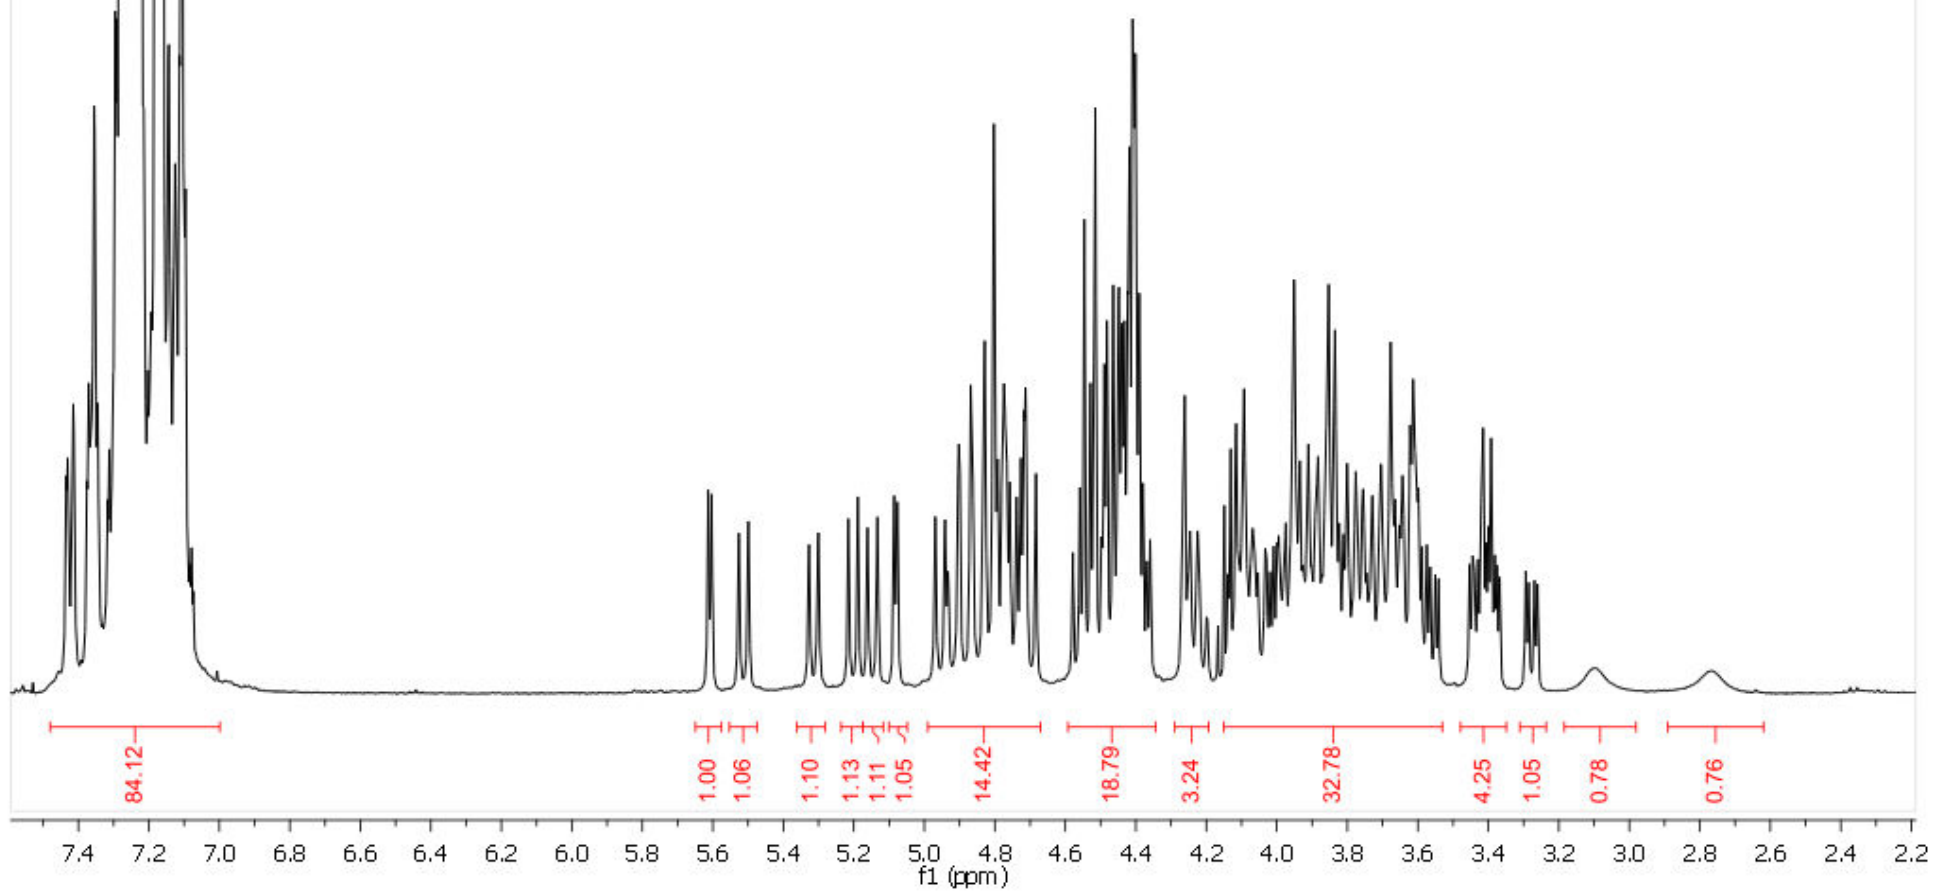



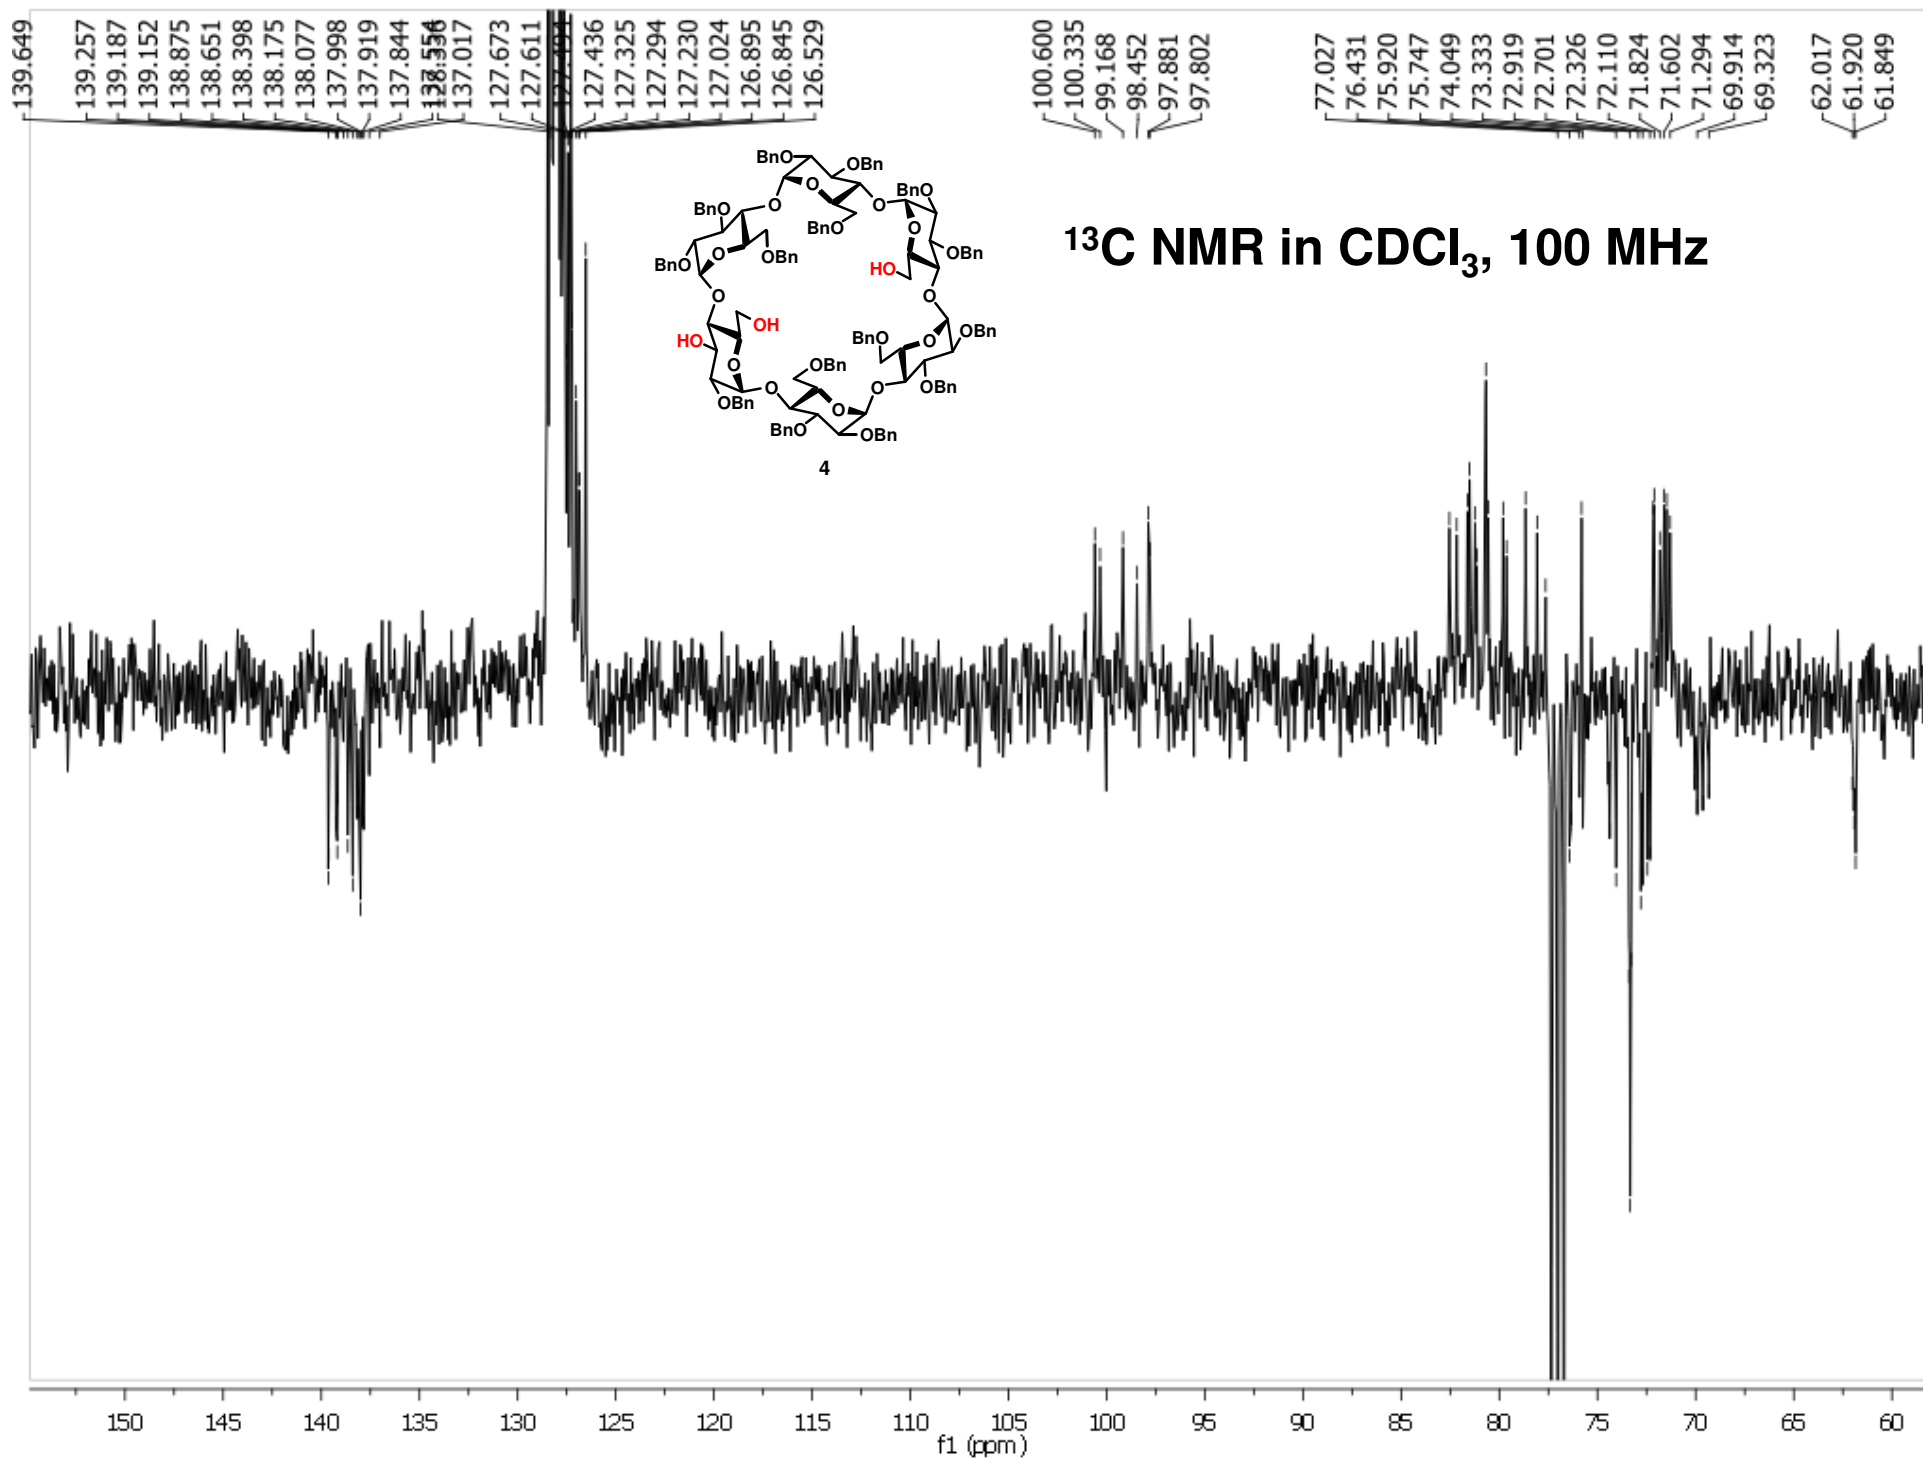

# <sup>1</sup>H NMR in CDCl<sub>3</sub>, 400 MHz

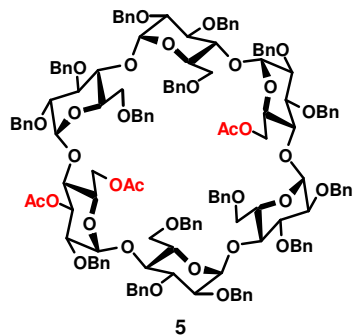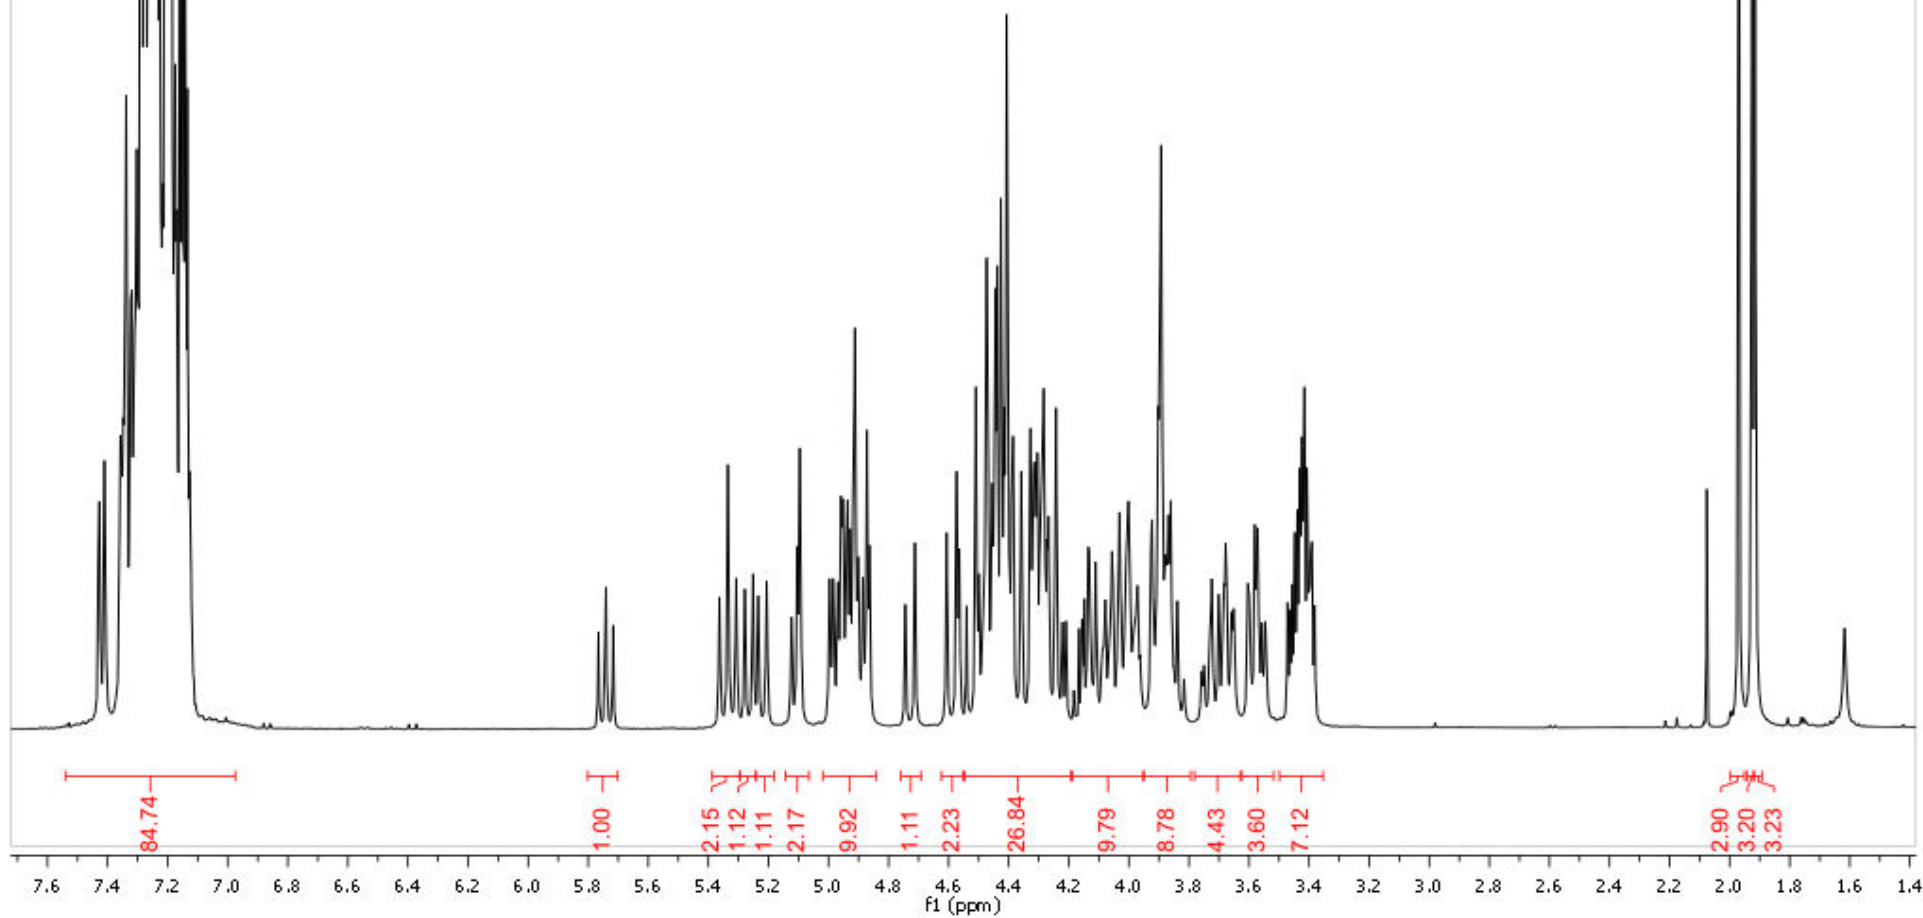

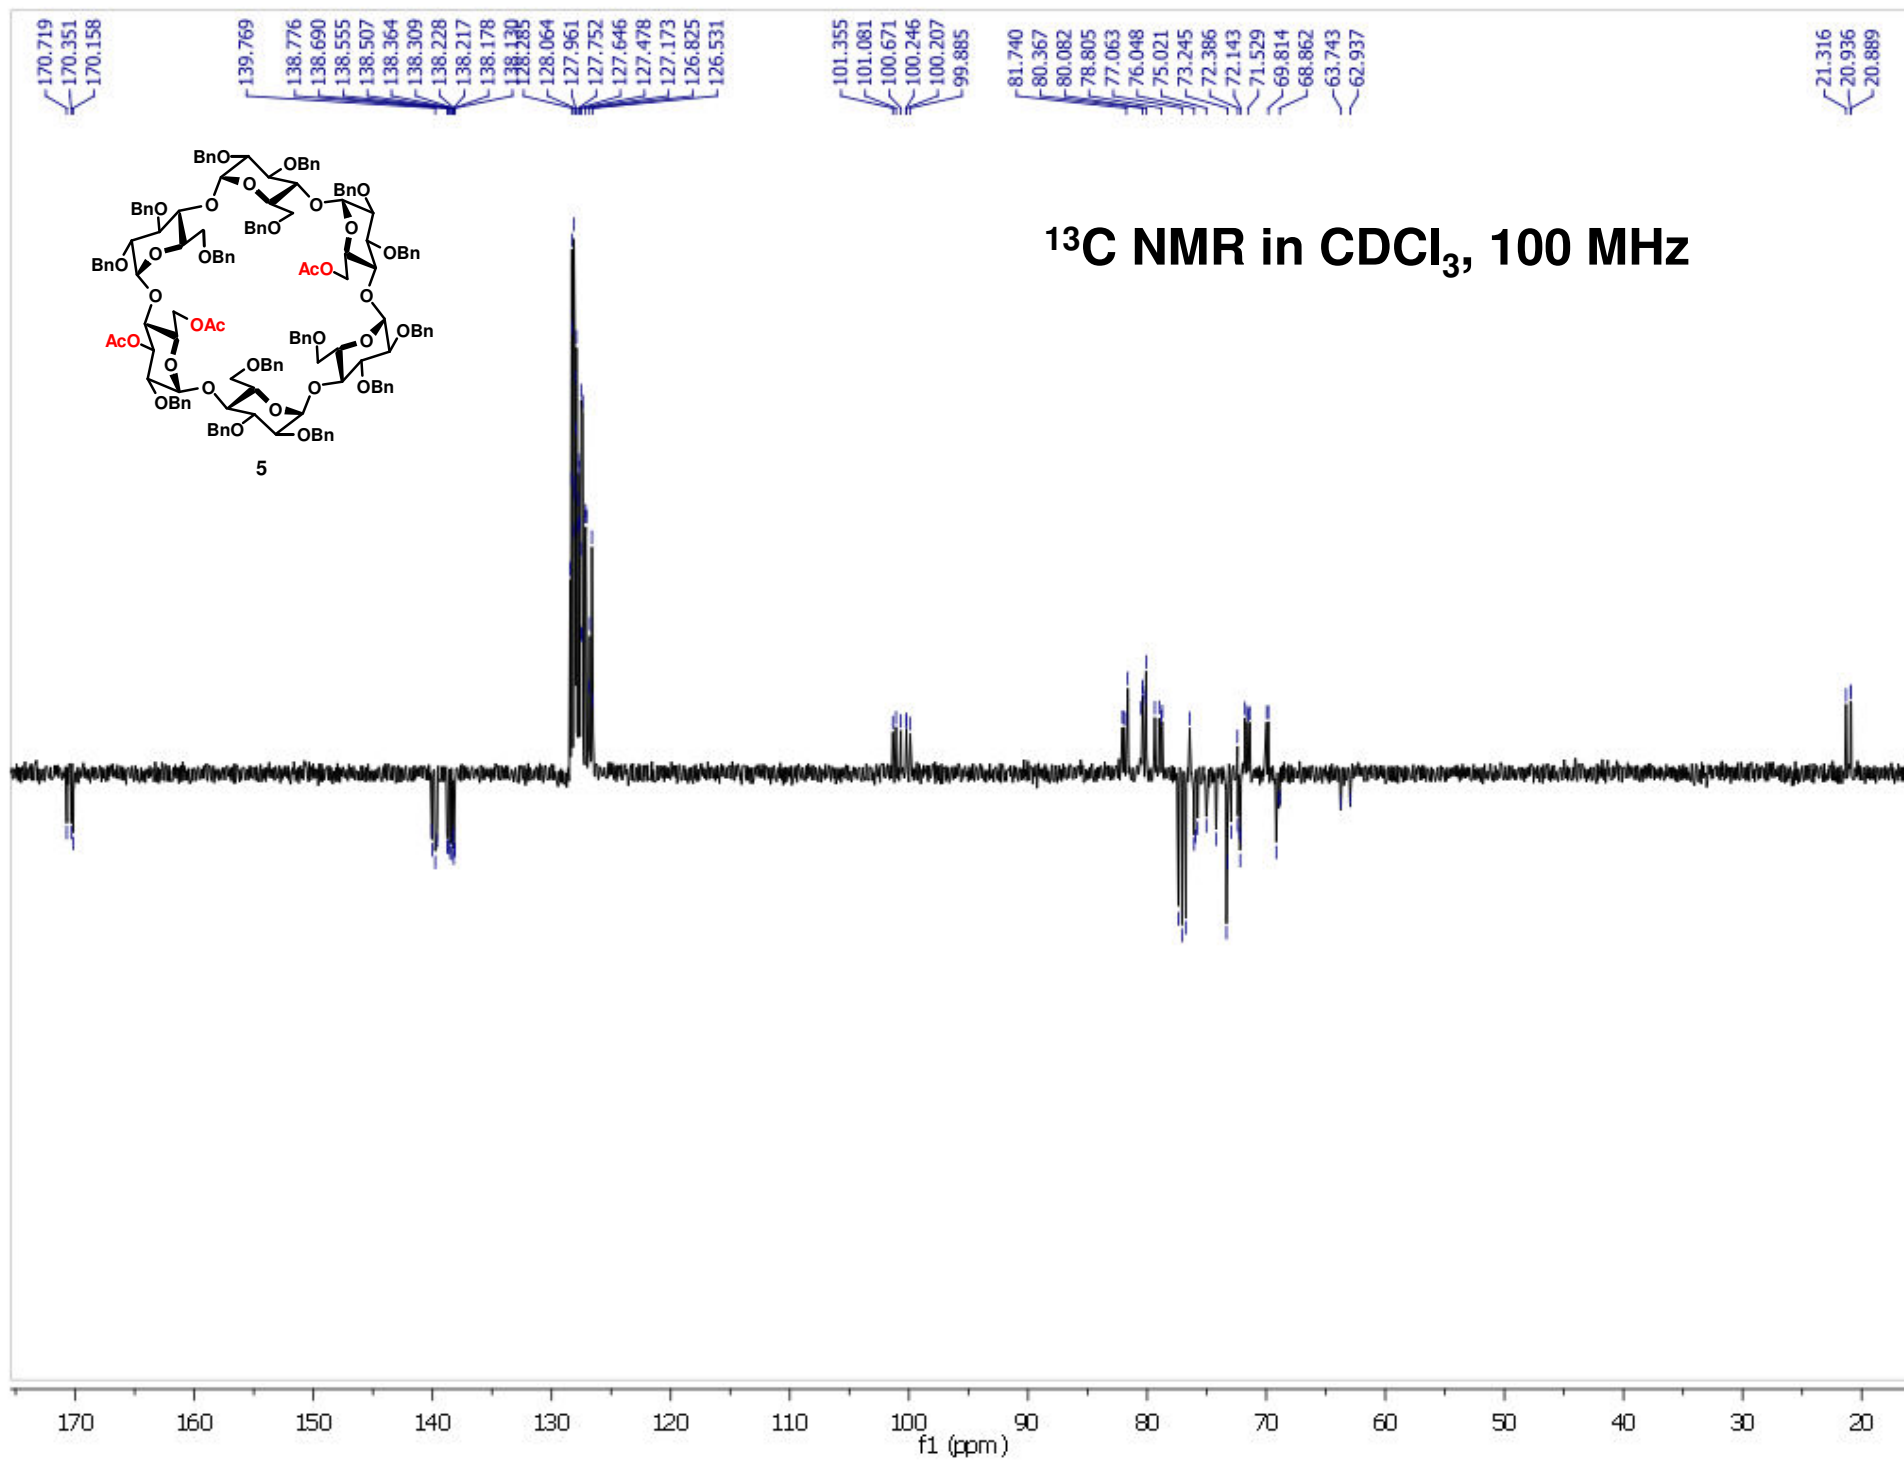



# $^1\text{H}$ - $^1\text{H}$ COSY NMR in $\text{CDCl}_3$ , 400 MHz

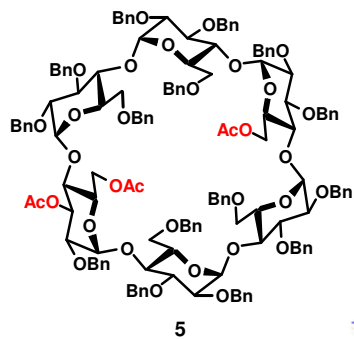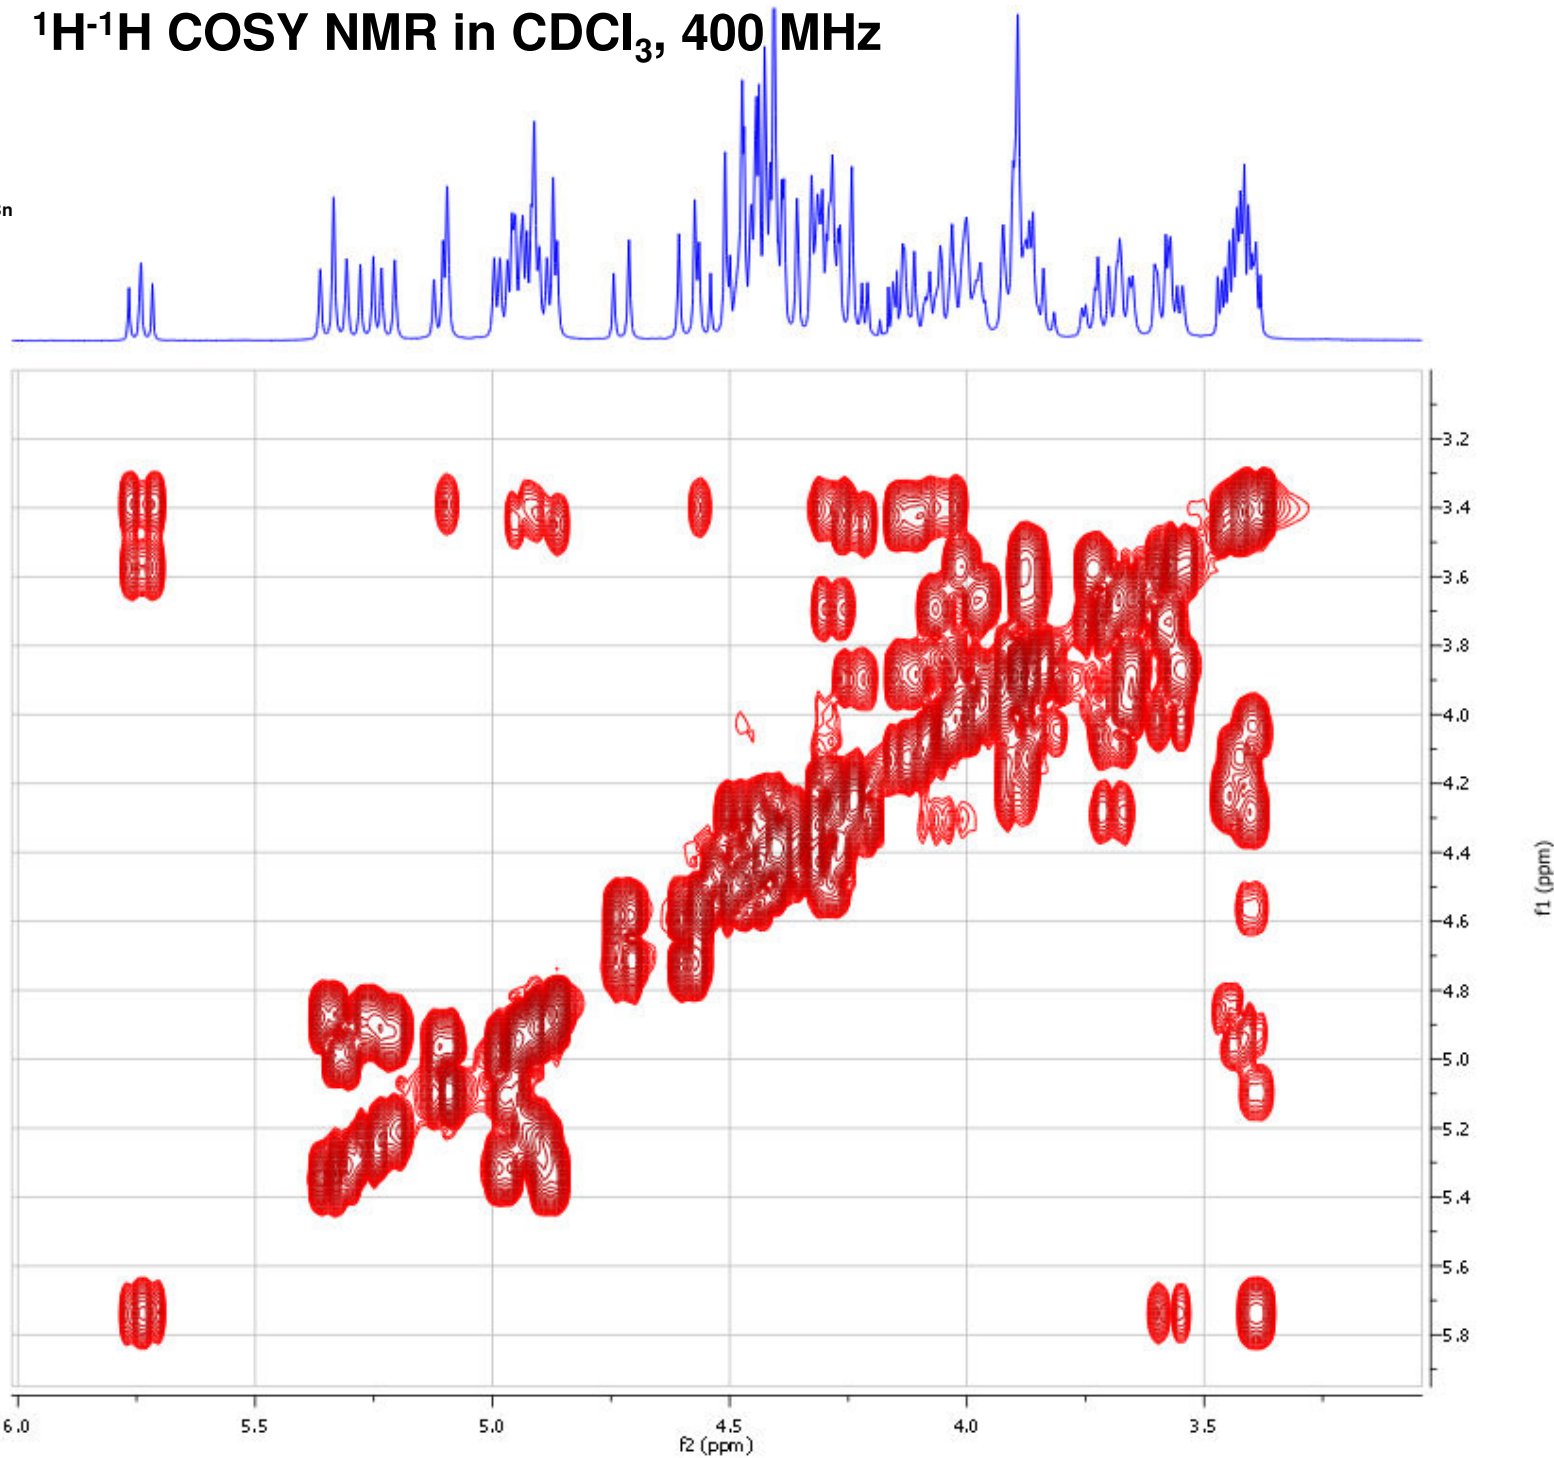



# Selective 1D <sup>1</sup>H TOCSY Experiment

H-3 of the 3,6-di-O-acetylated glucosyl unit (shaded) in **5** is excited

Both O-3 and O-6 are acetylated

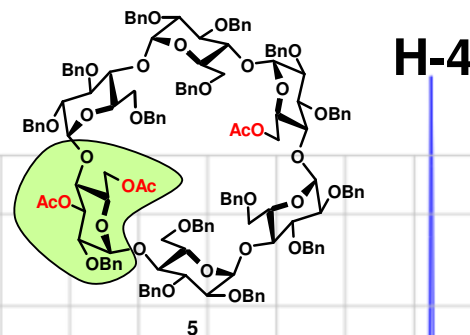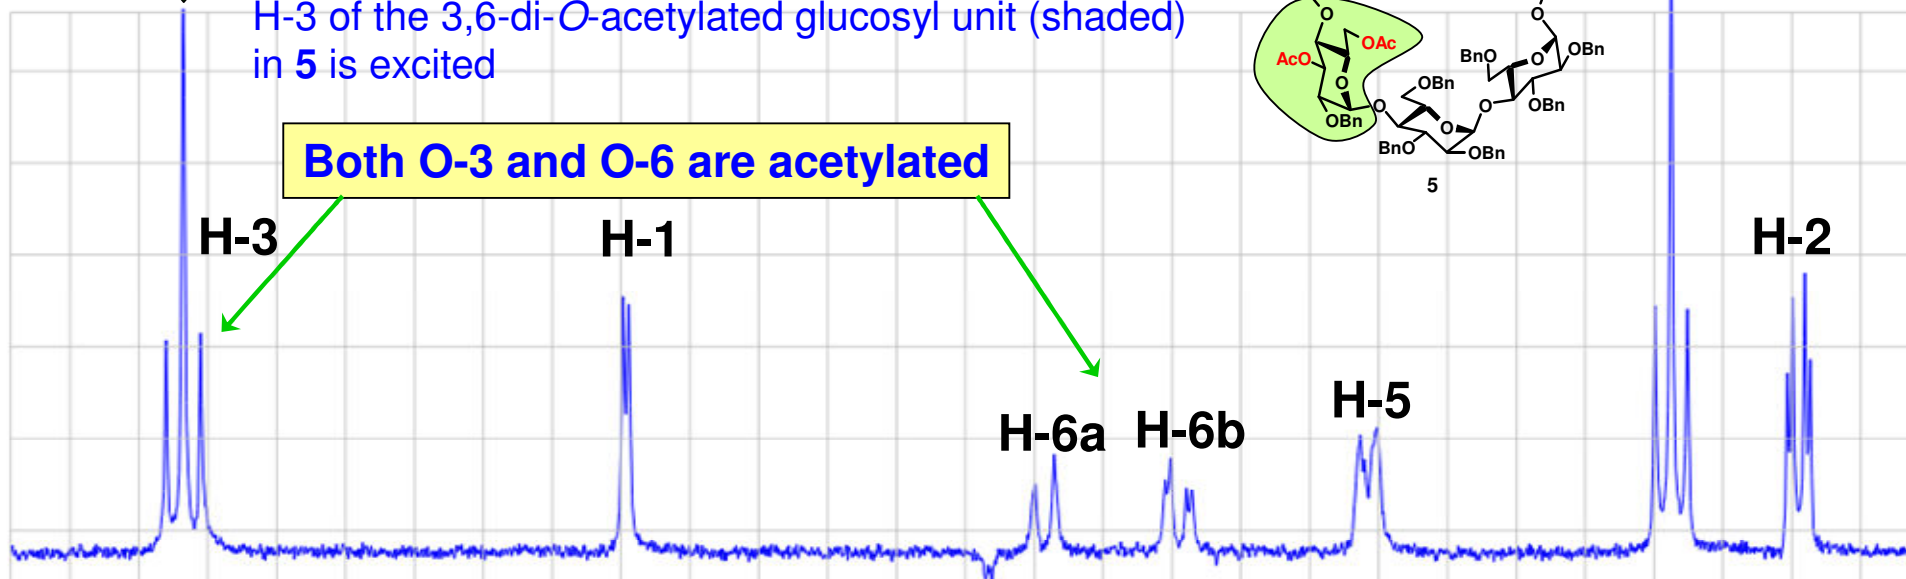

## 1D <sup>1</sup>H NMR of **5**

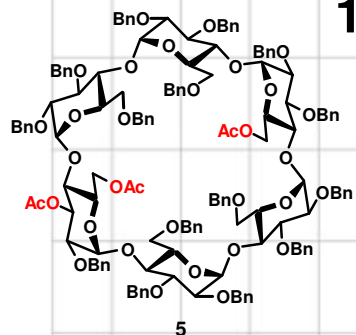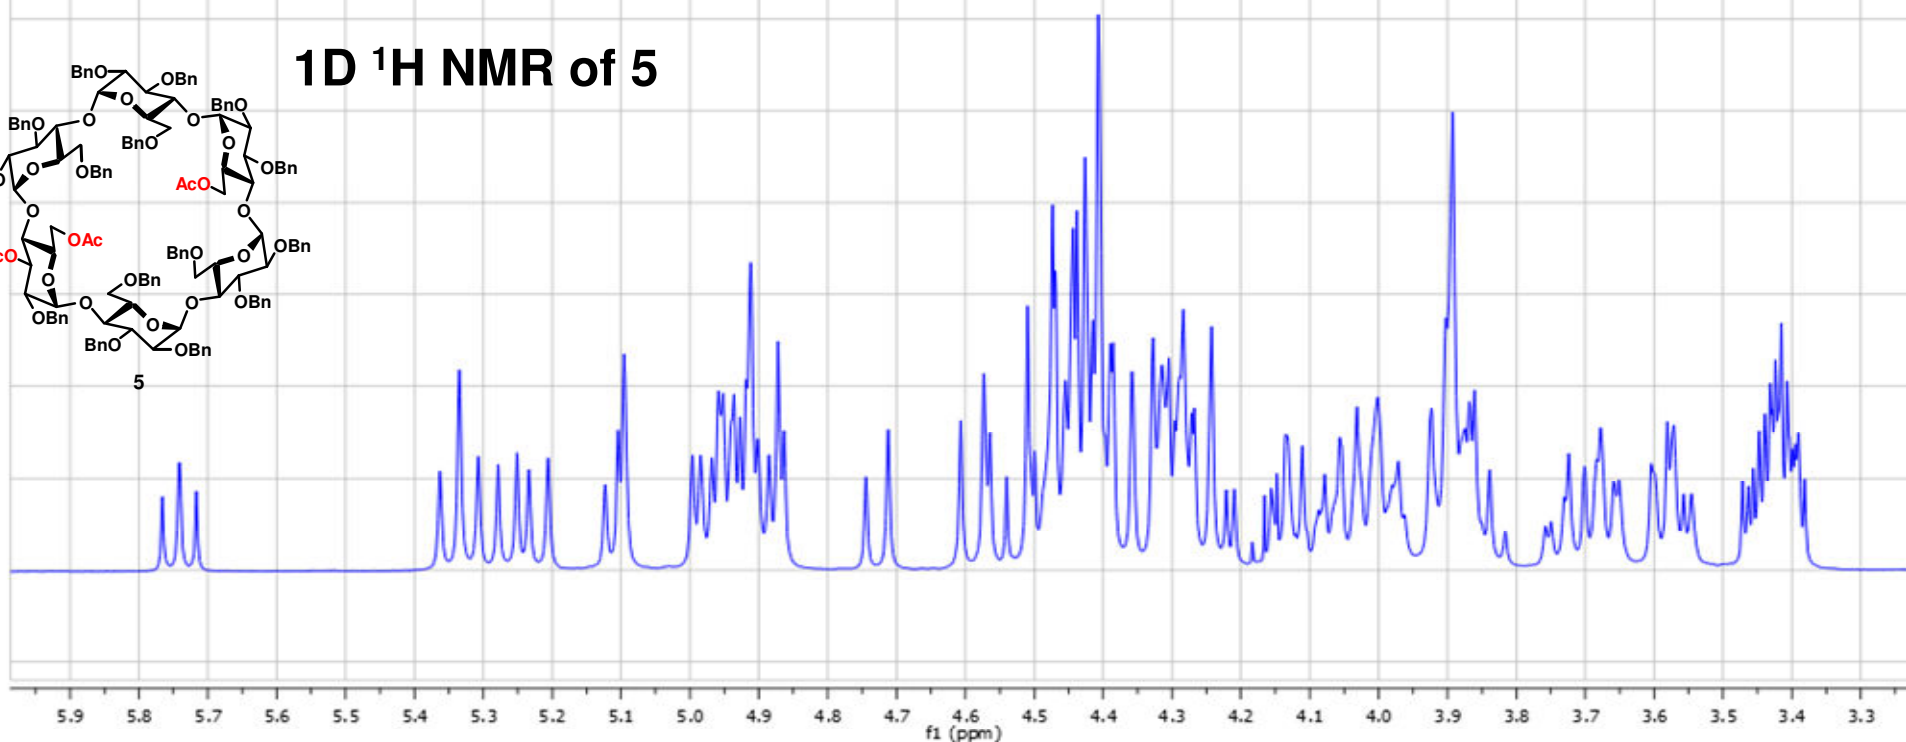



# $^1\text{H}$ - $^1\text{H}$ TOCSY NMR in $\text{CDCl}_3$ , 400 MHz

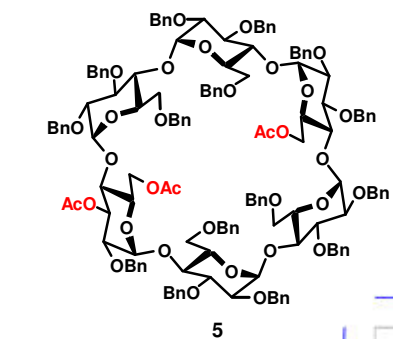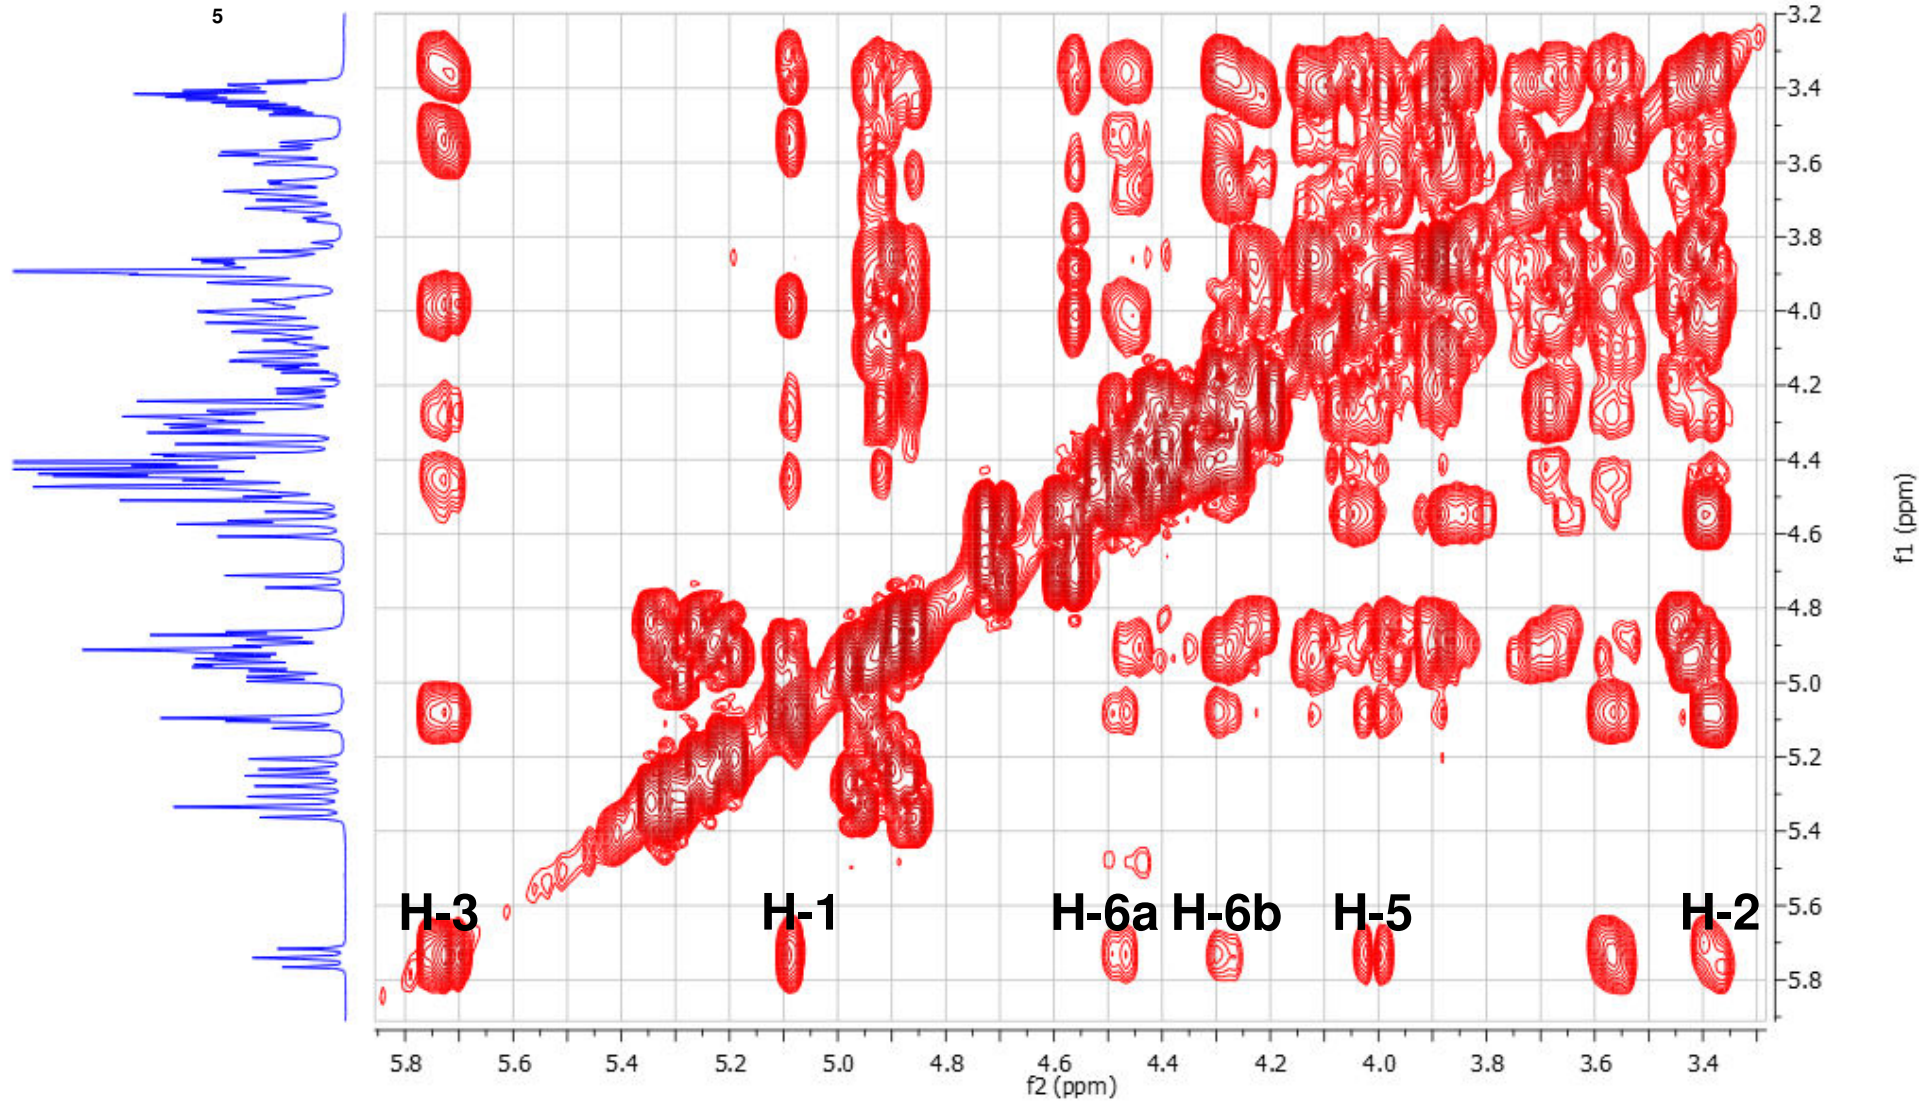

**$^1\text{H}$  NMR in  $\text{CD}_3\text{OD}$ , 400 MHz**

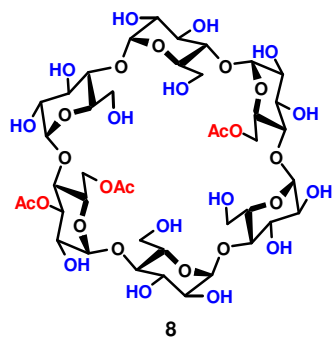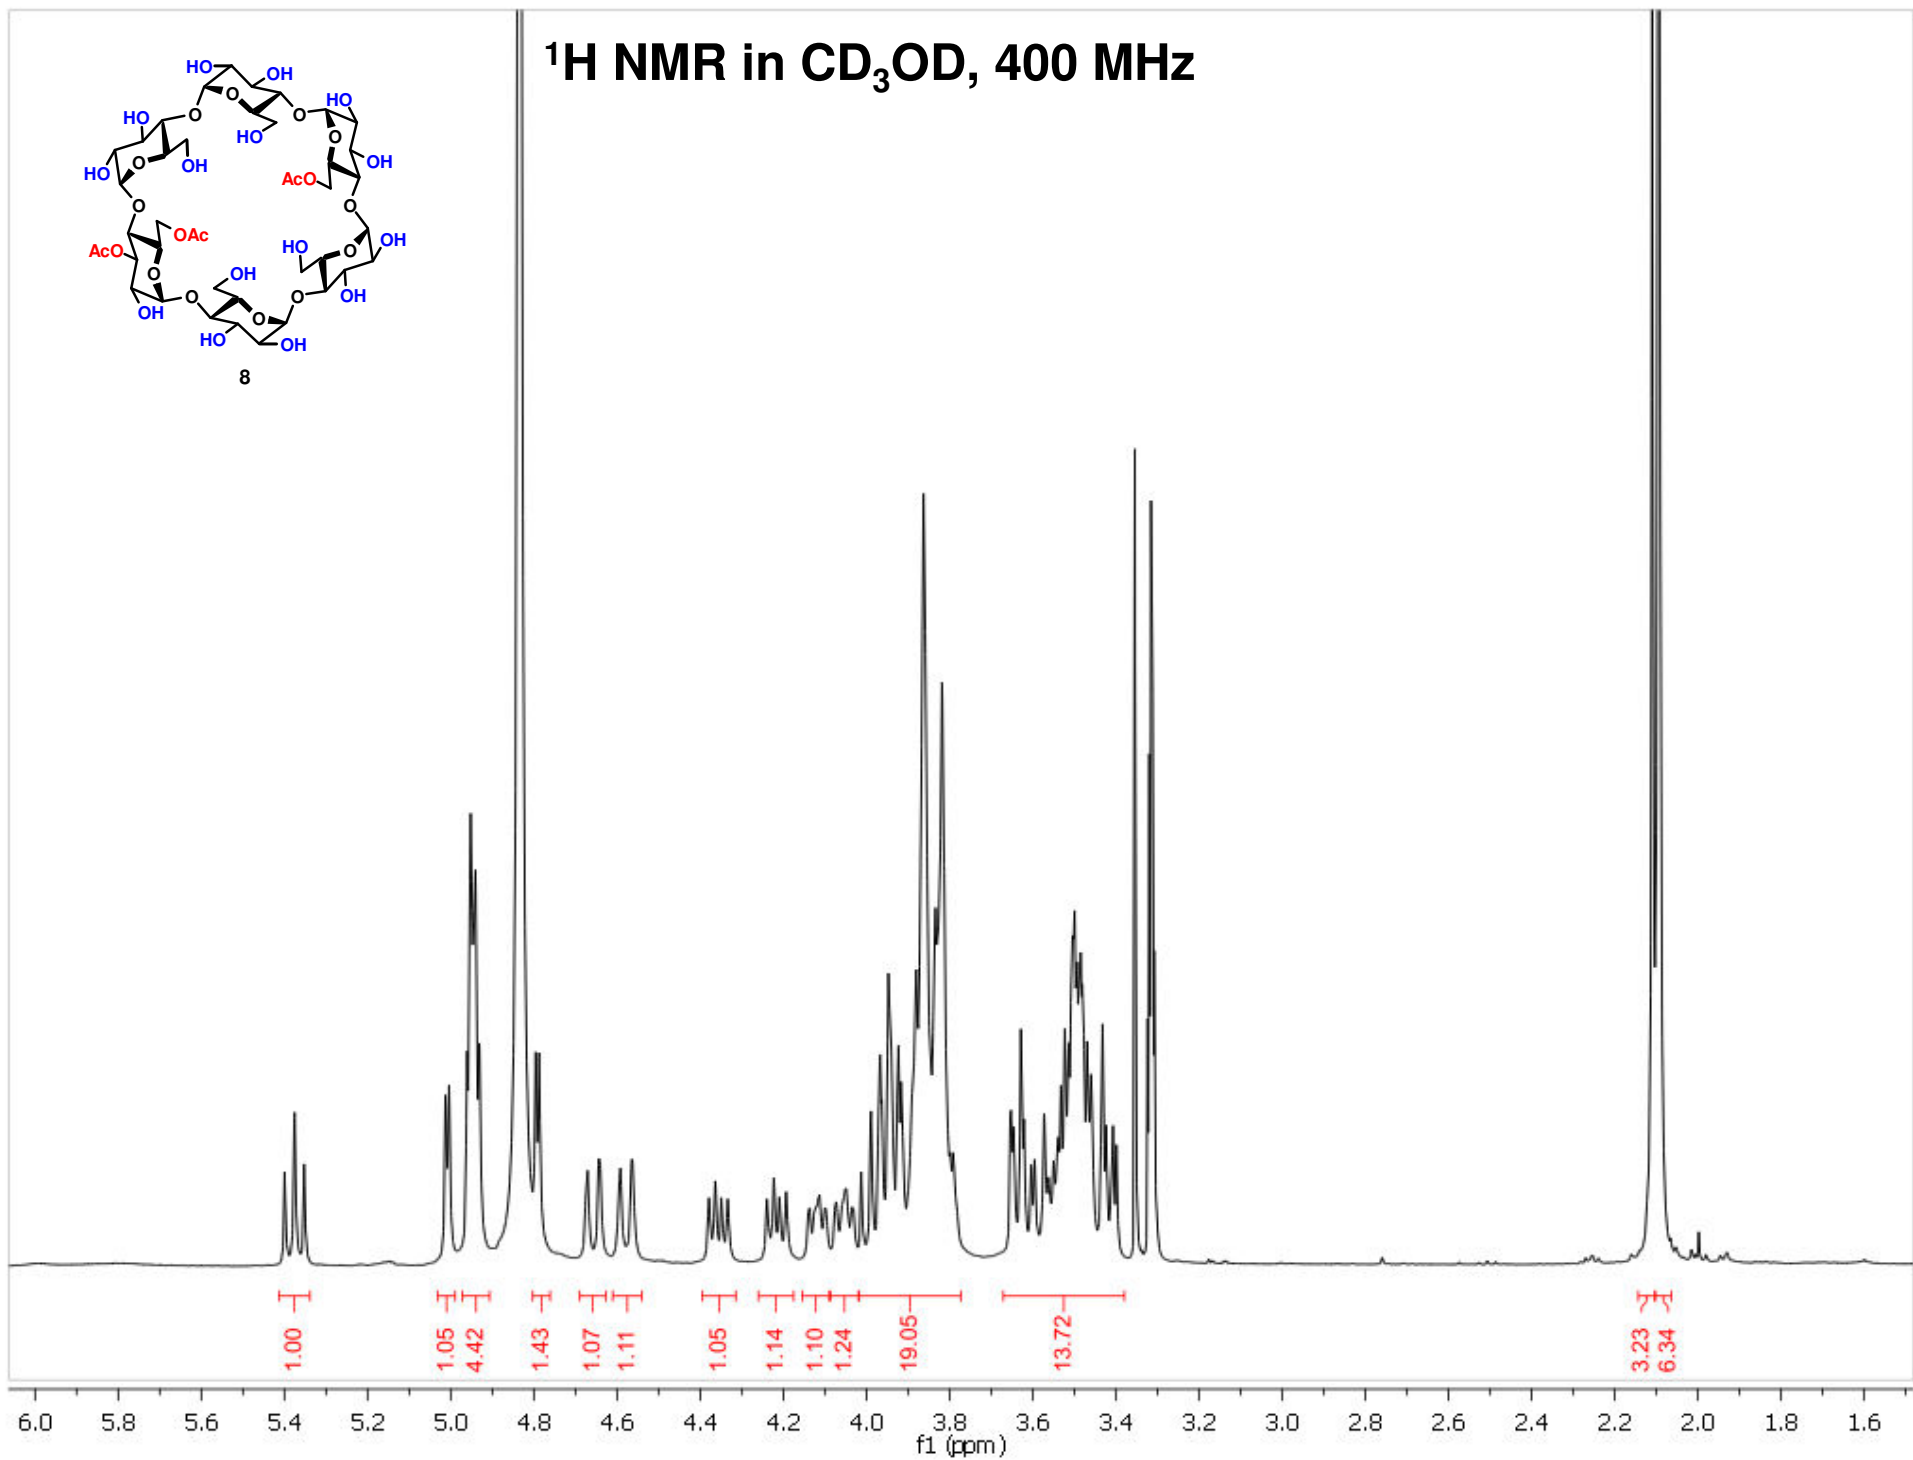

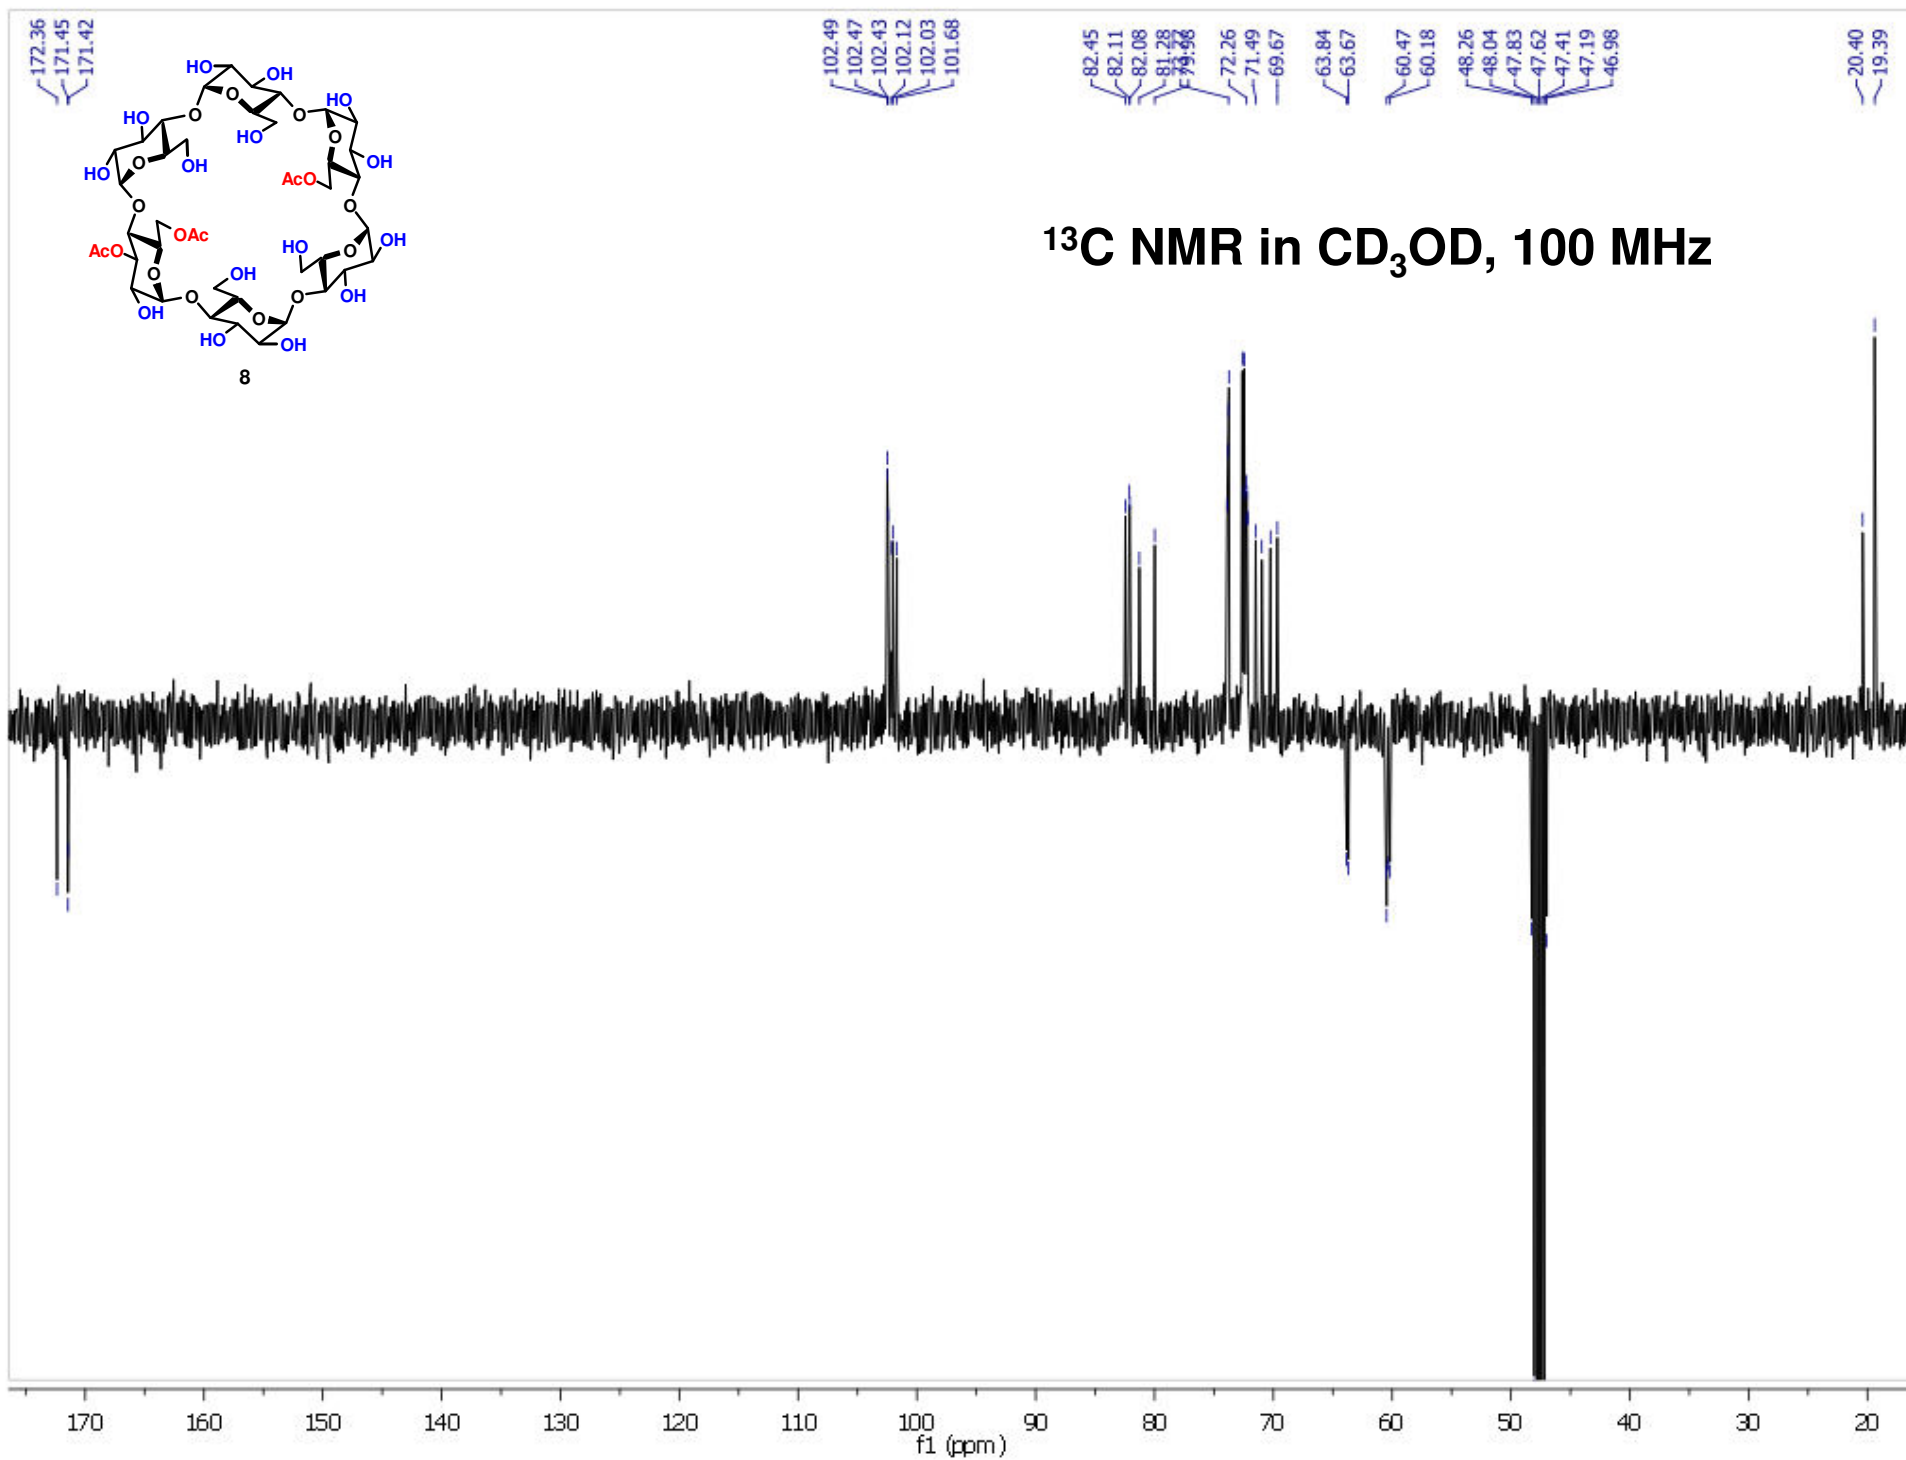

# $^1\text{H}$ - $^1\text{H}$ COSY NMR in $\text{CD}_3\text{OD}$ , 400 MHz

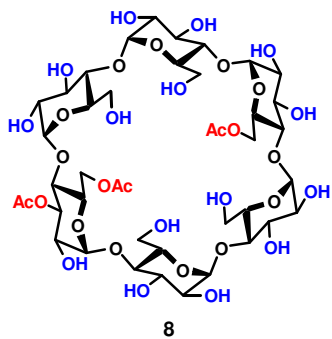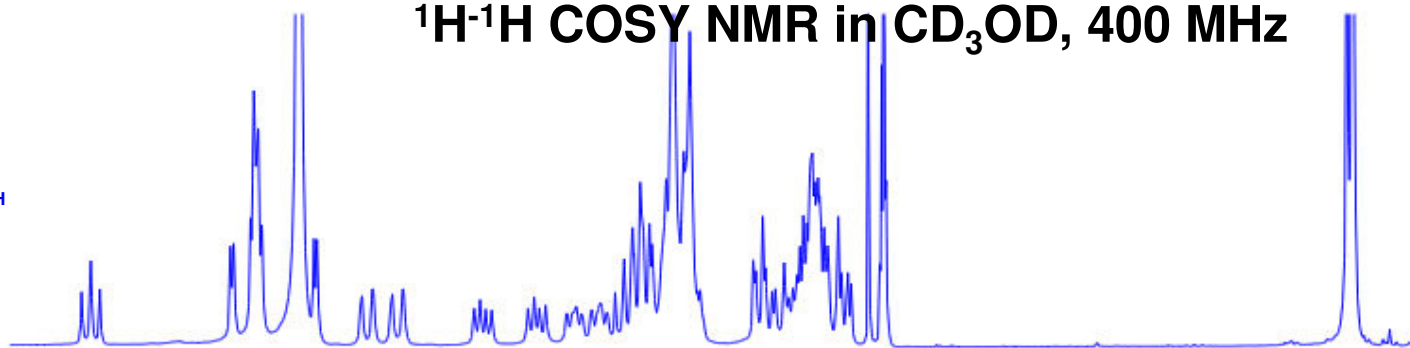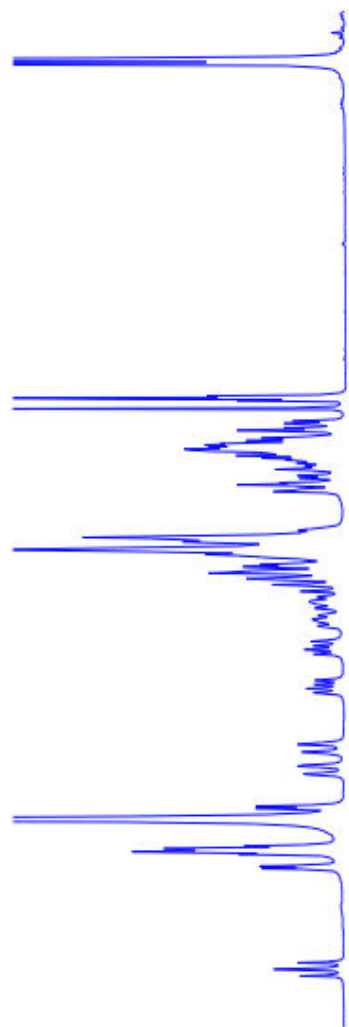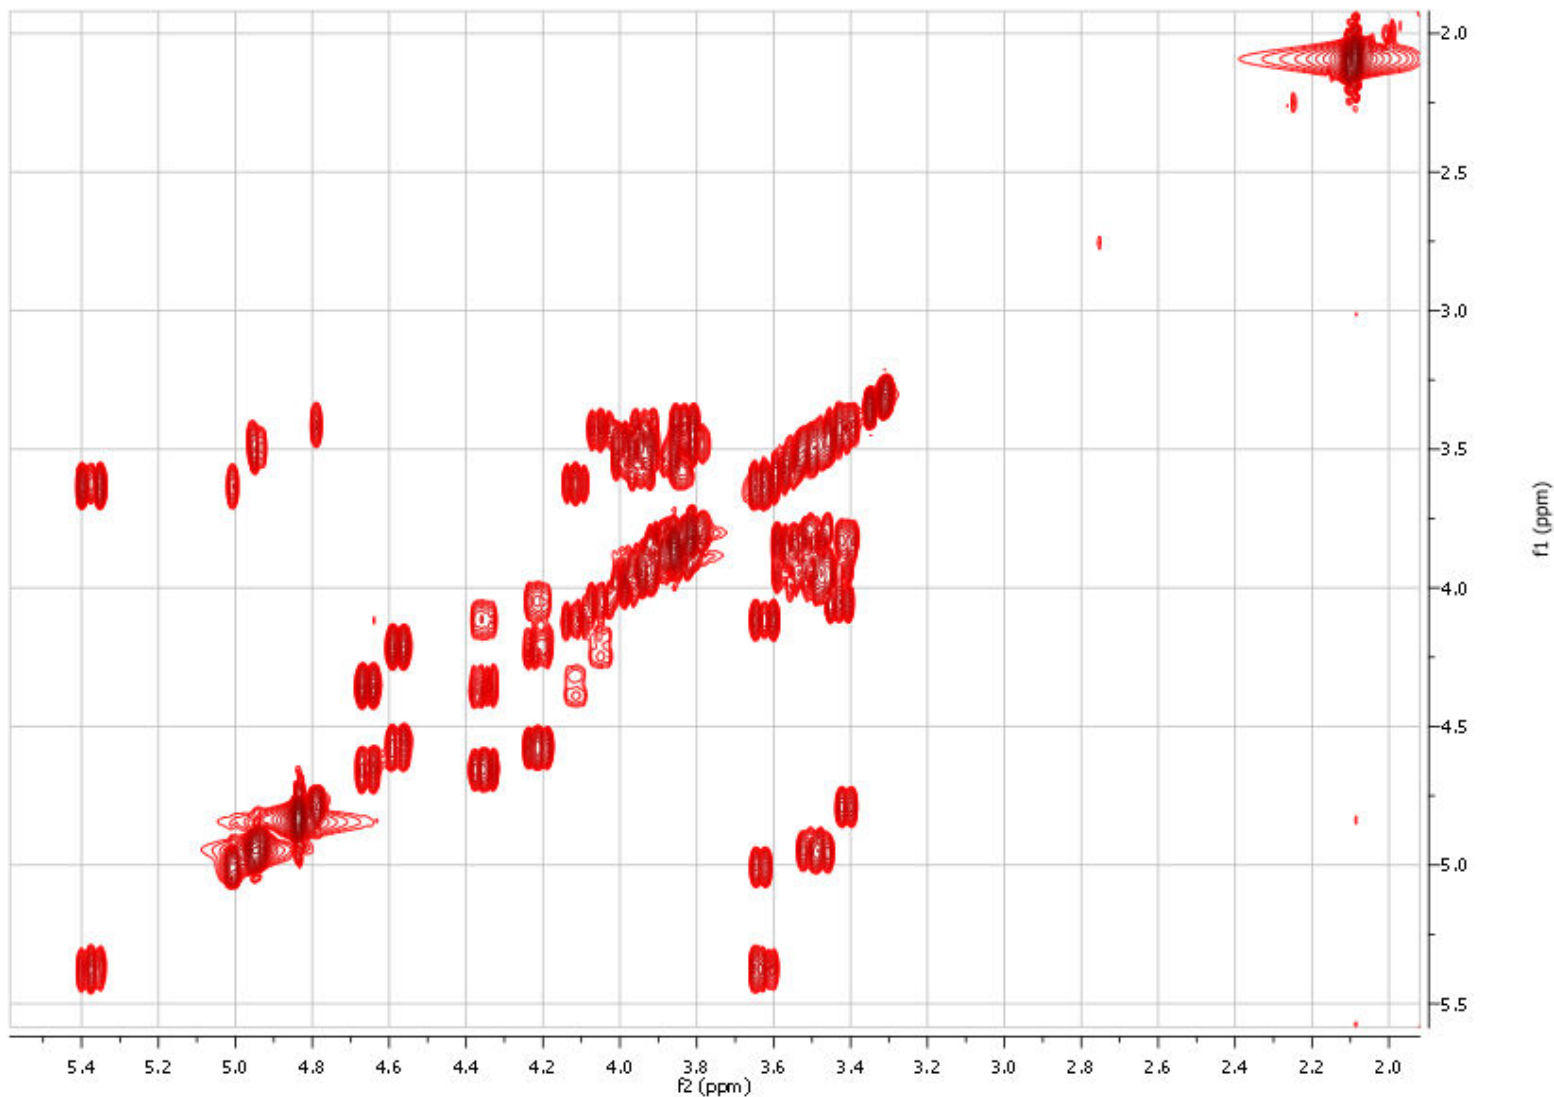



# $^1\text{H}$ - $^1\text{H}$ TOCSY NMR in $\text{CD}_3\text{OD}$ , 400 MHz

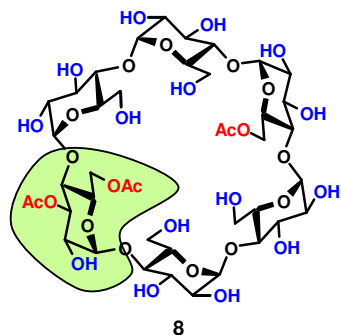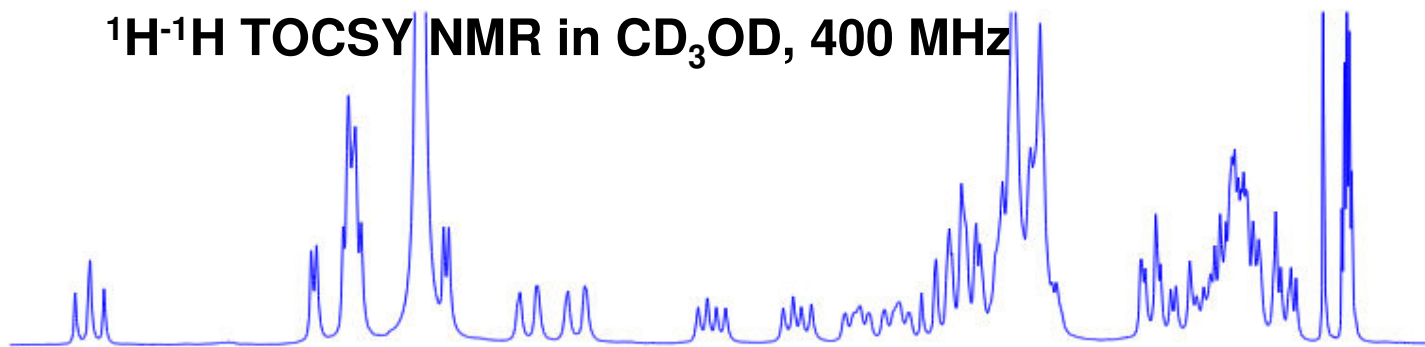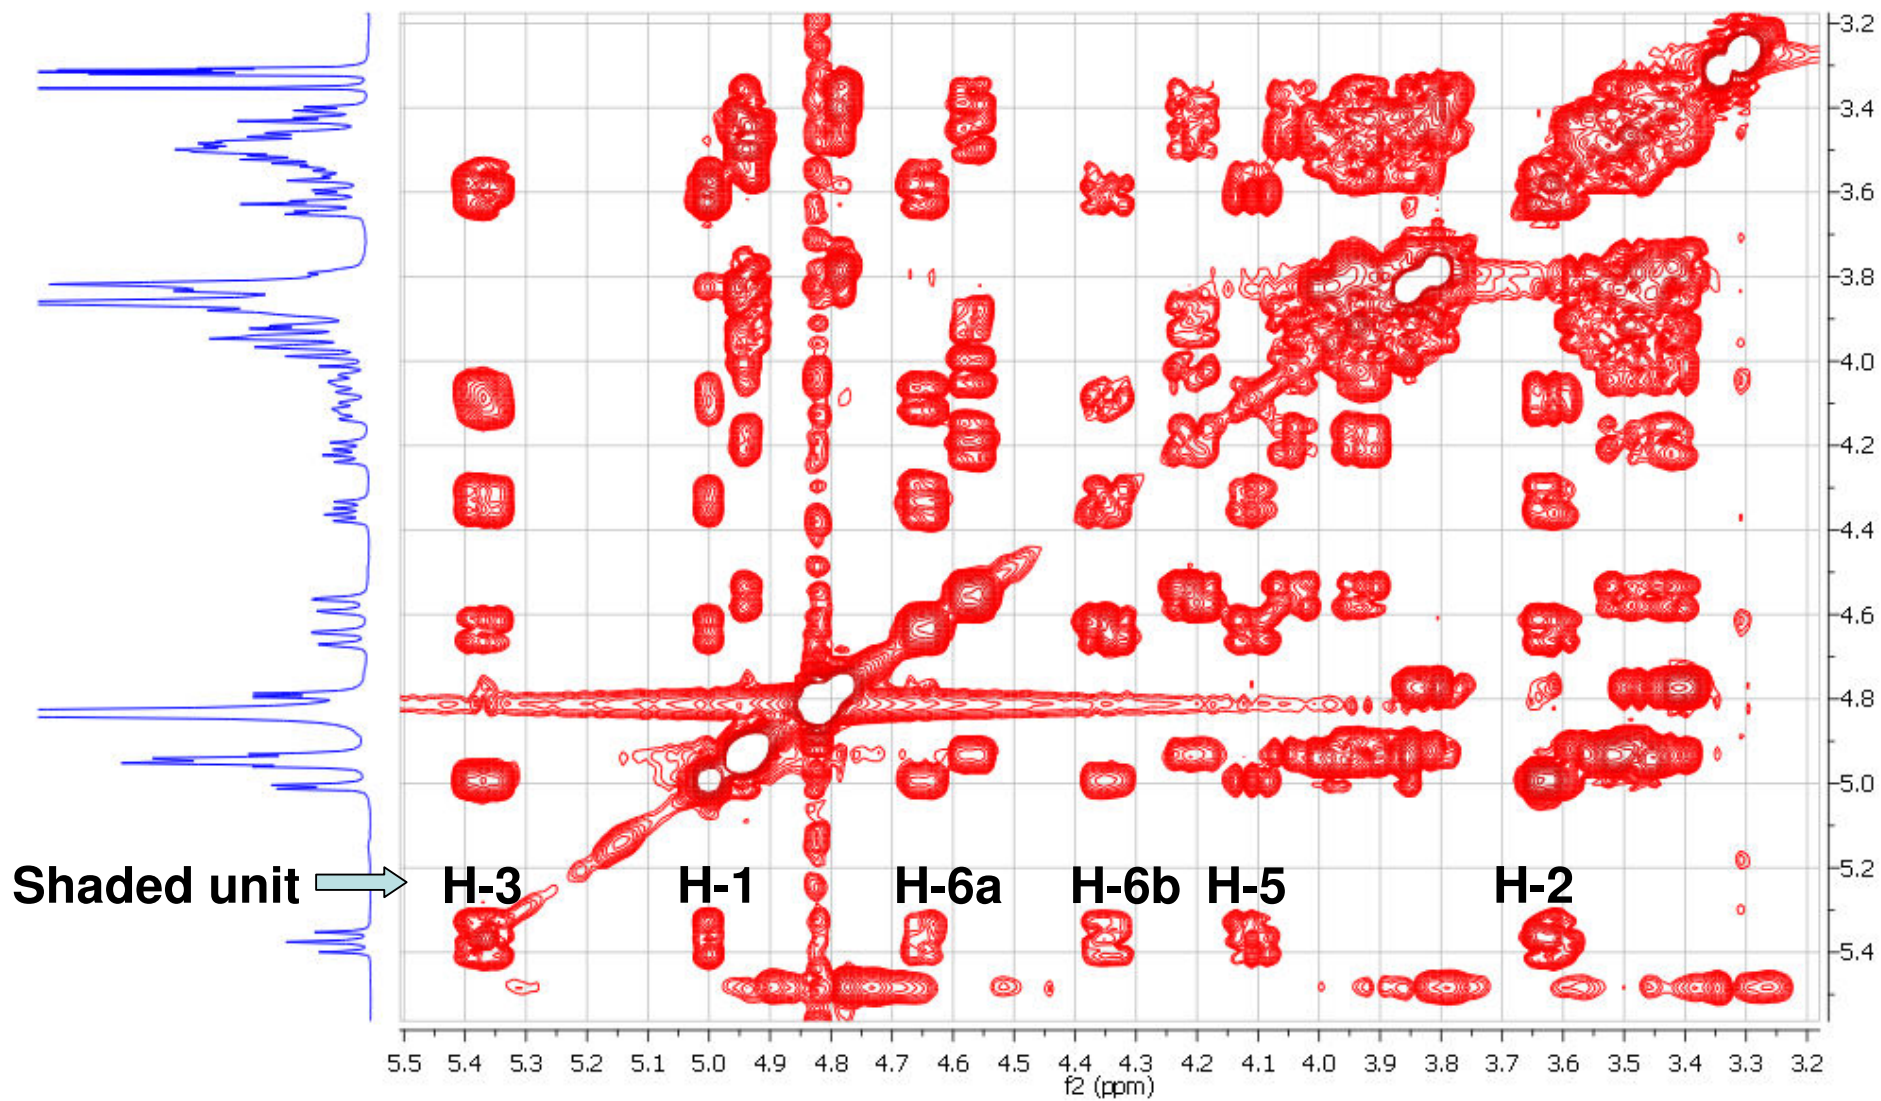





**$^1\text{H}$  NMR in  $\text{CDCl}_3$ , 400 MHz**

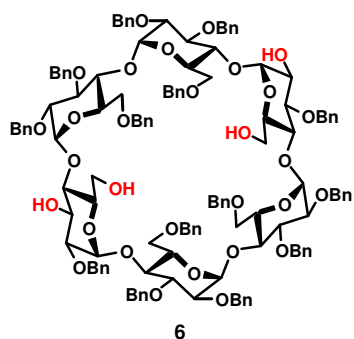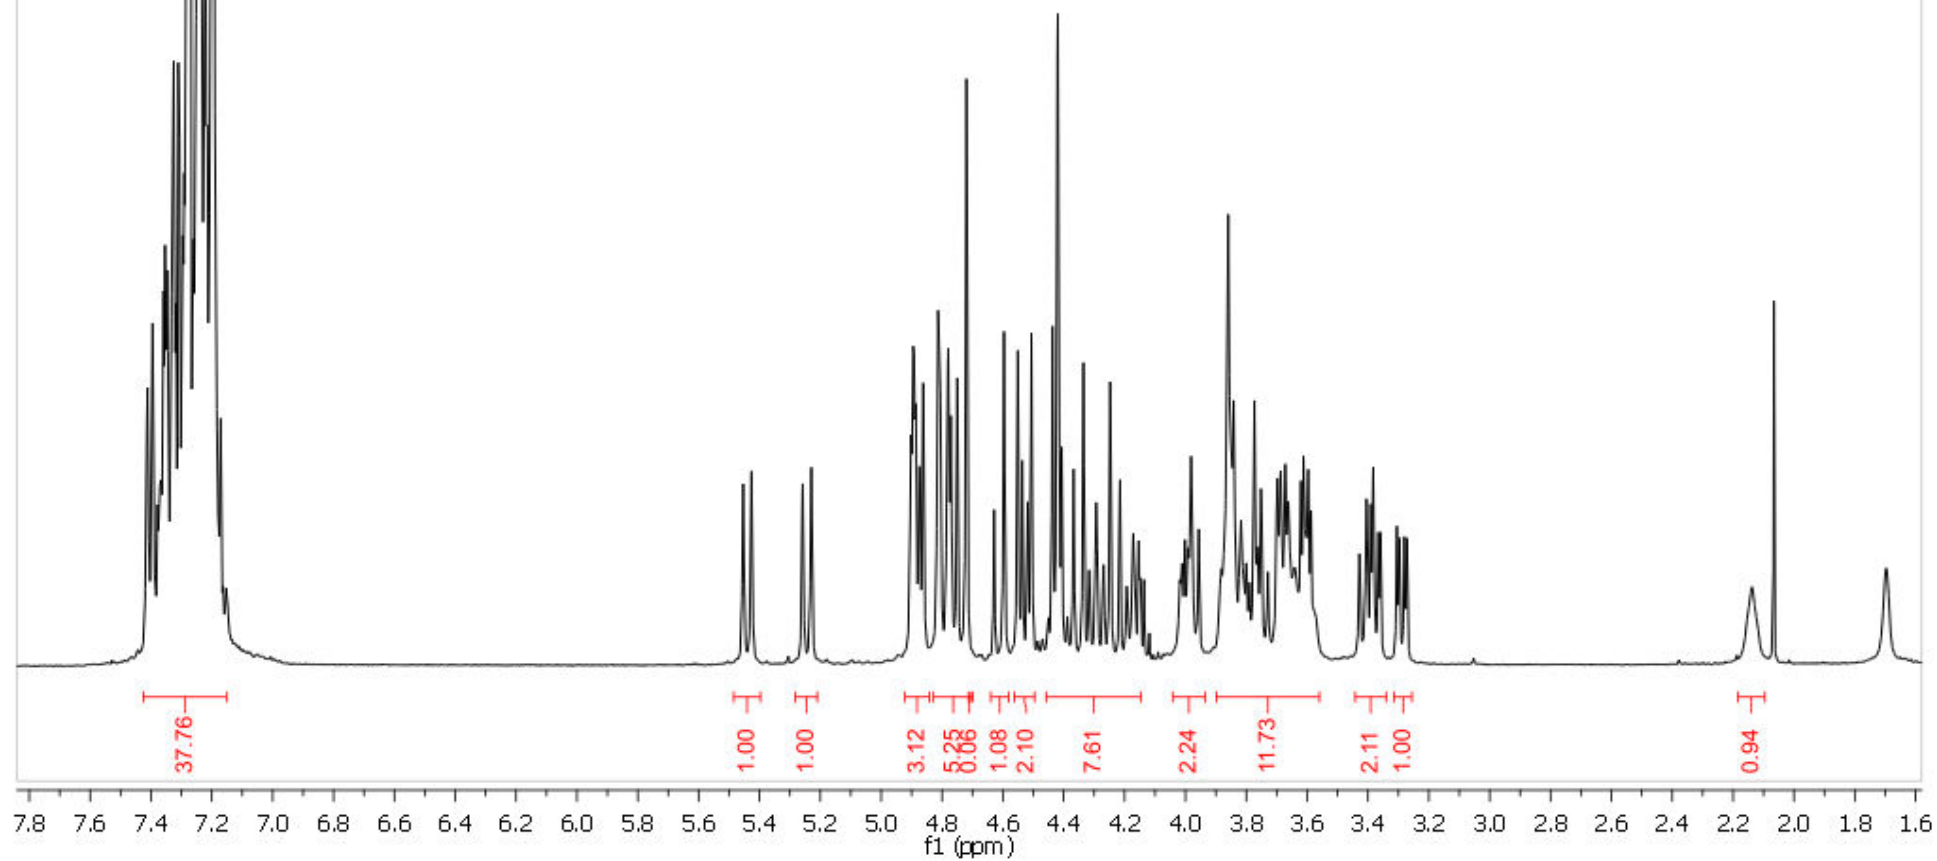

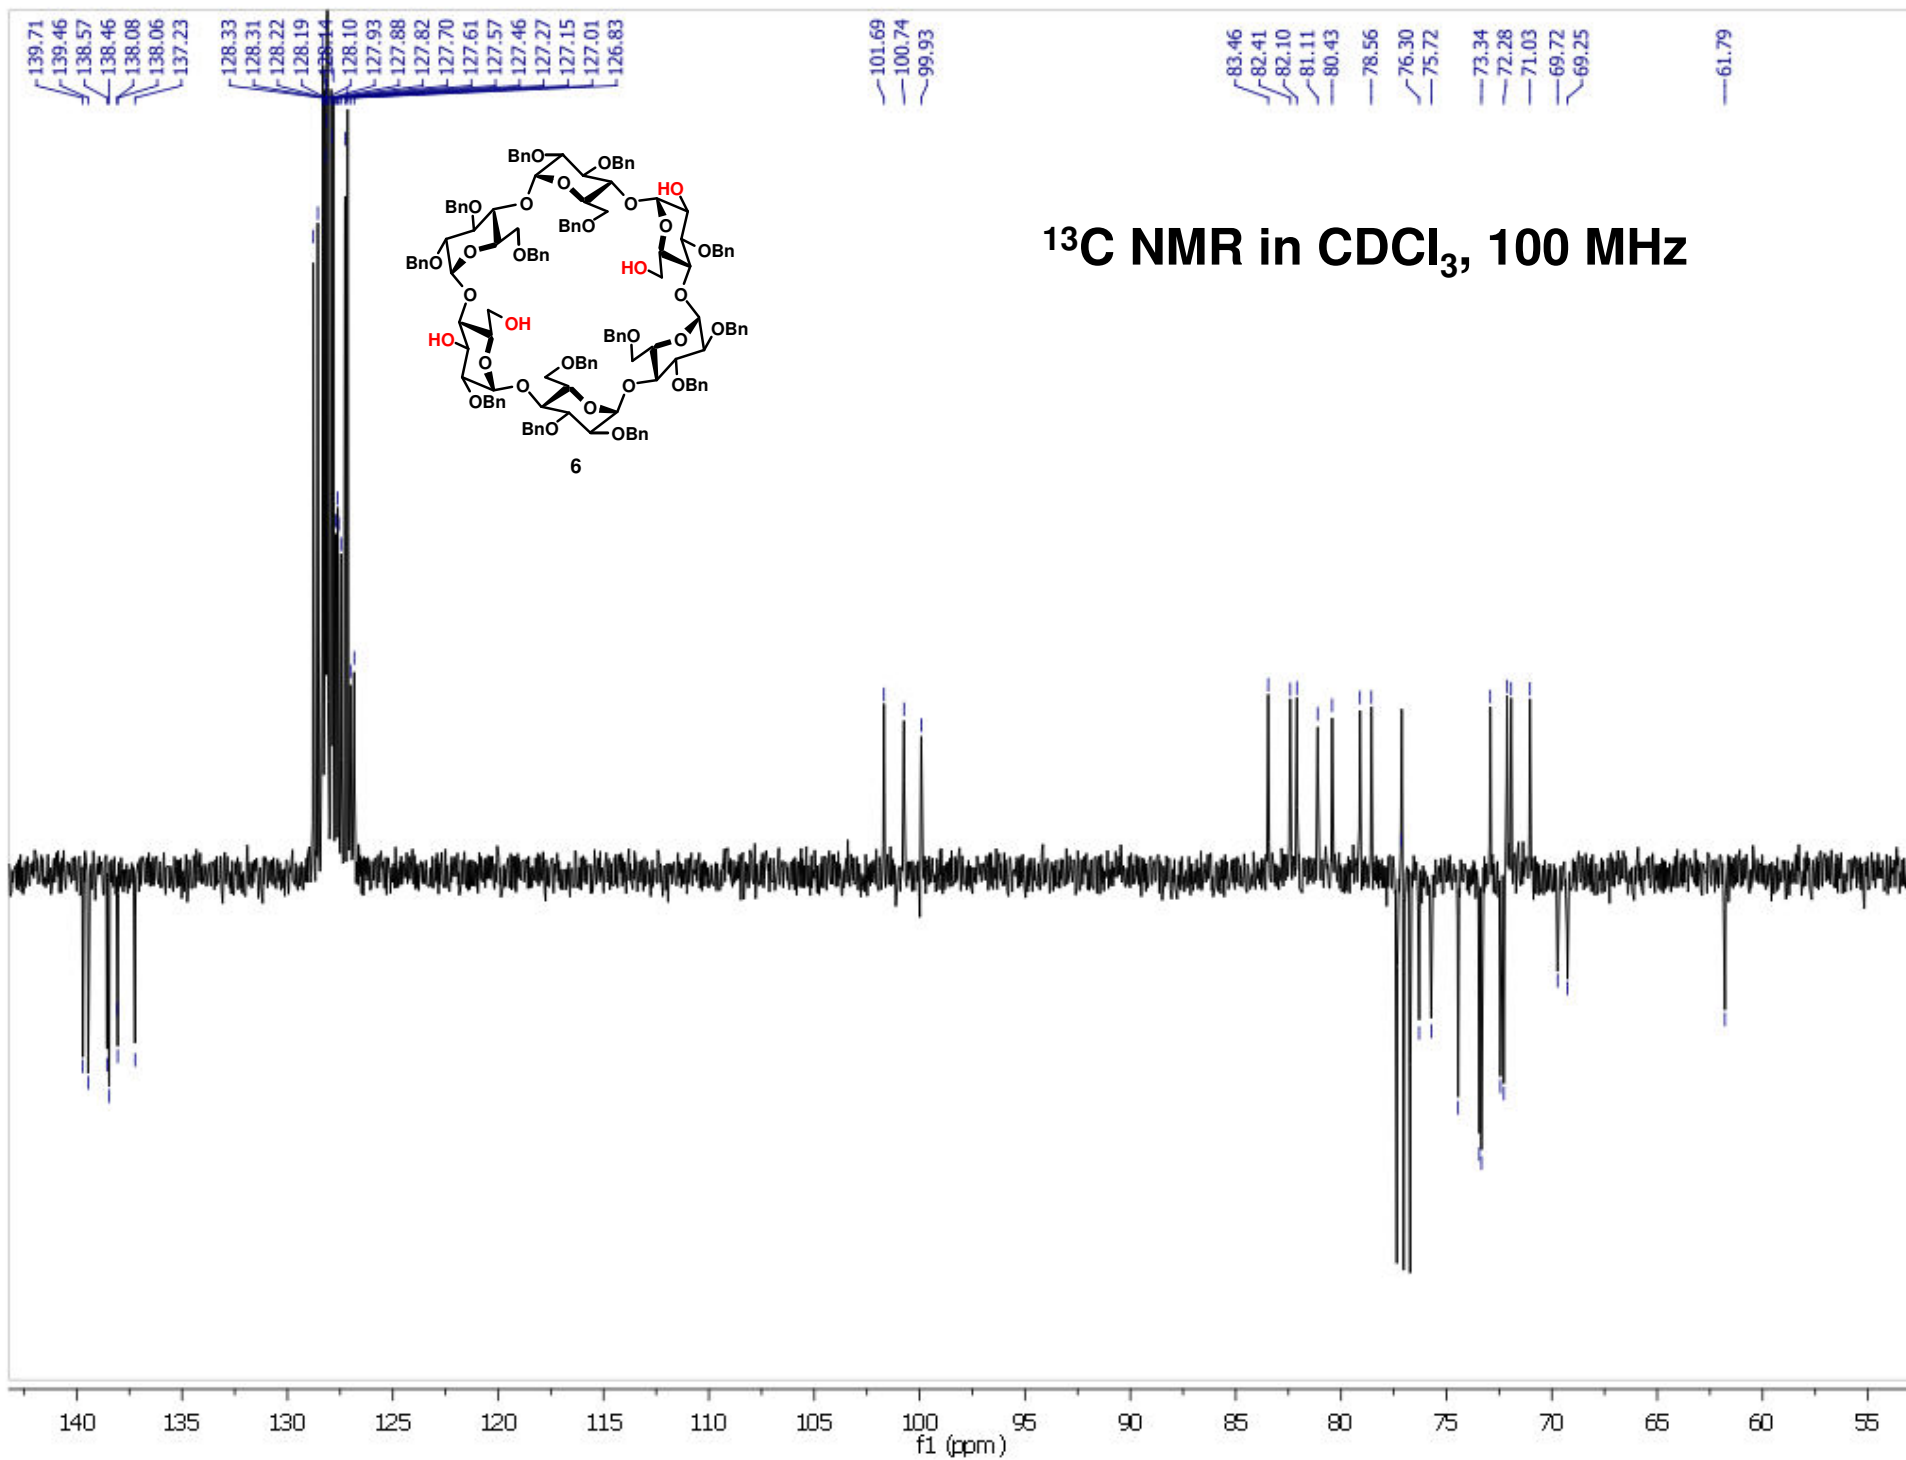

# $^1\text{H}$ - $^1\text{H}$ COSY NMR in $\text{CDCl}_3$ , 400 MHz

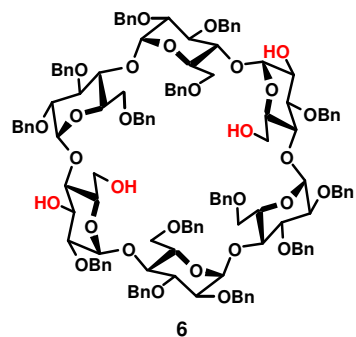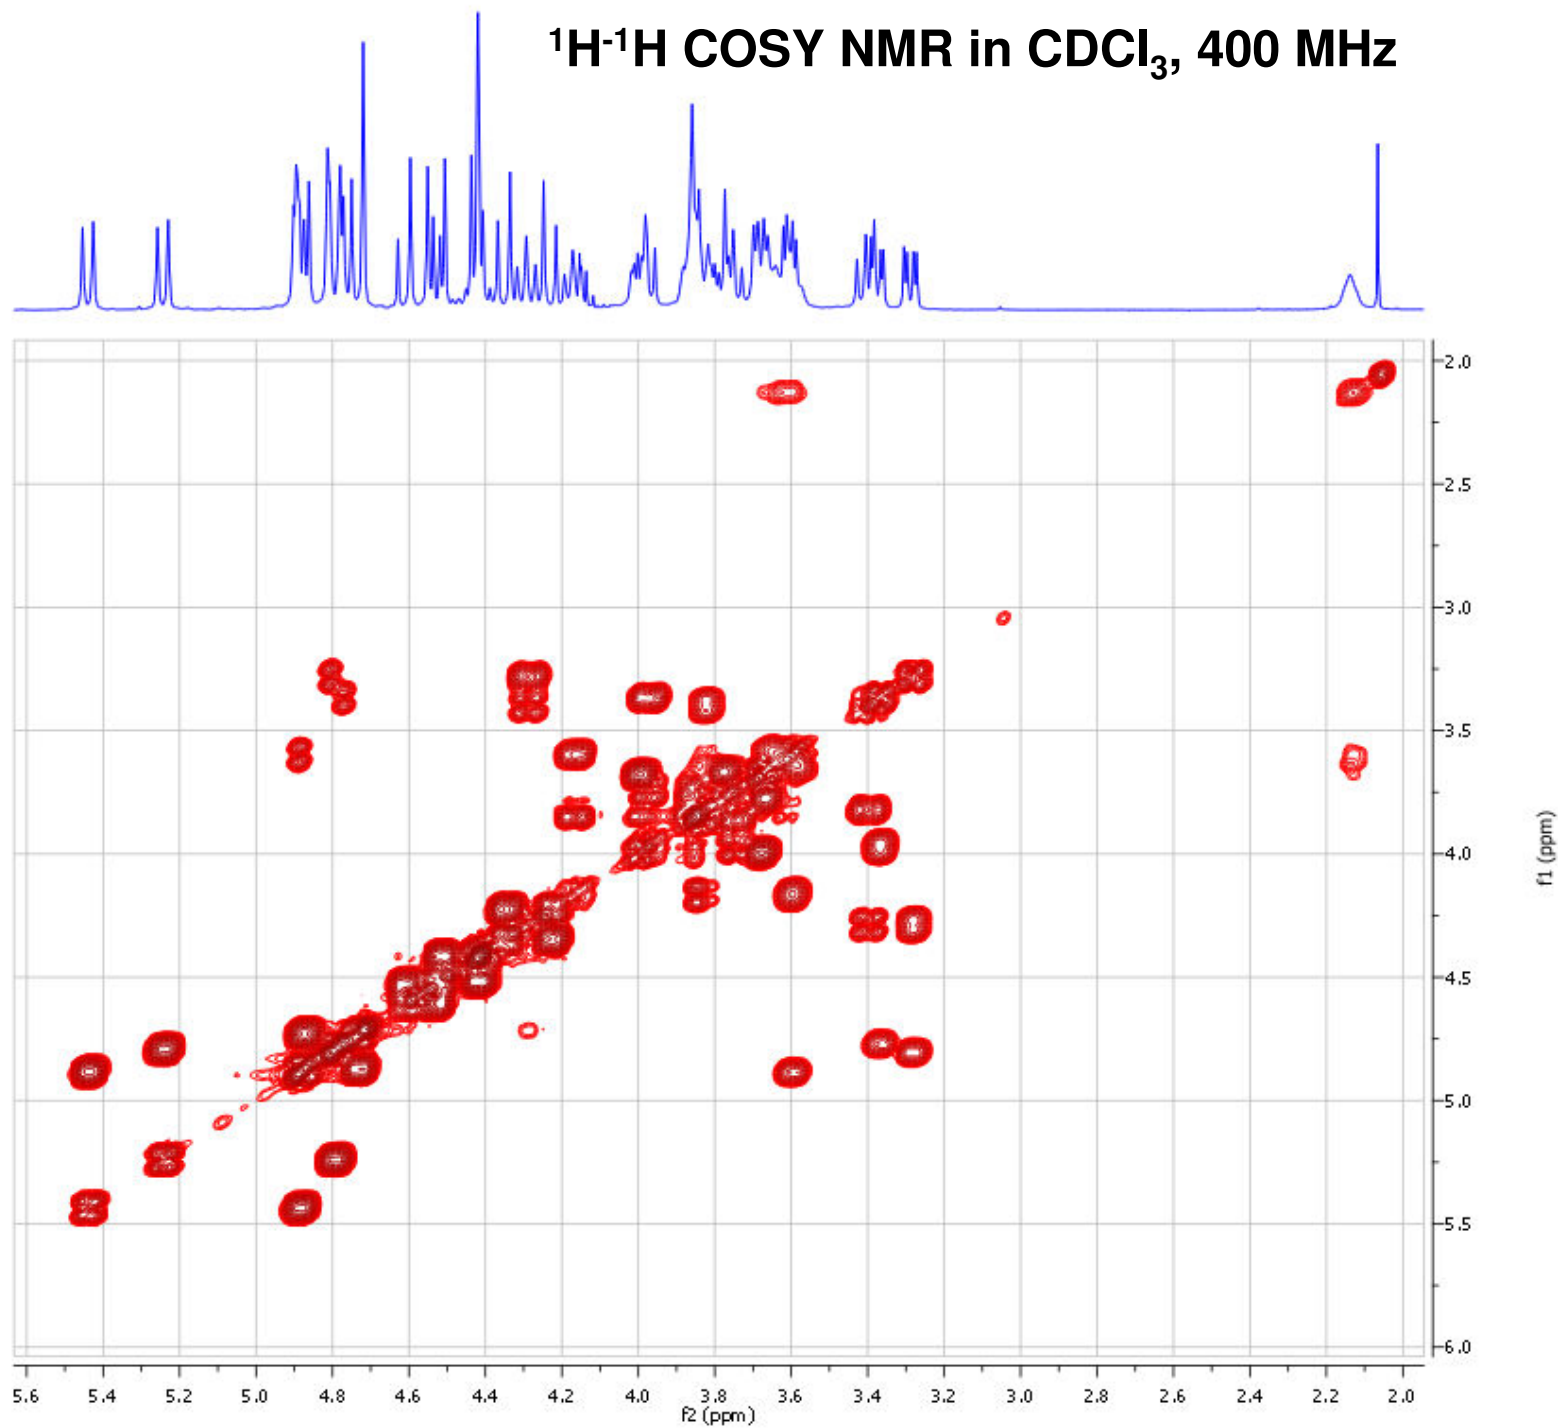

# $^1\text{H}$ - $^{13}\text{C}$ HSQC NMR in $\text{CDCl}_3$ , 400 MHz

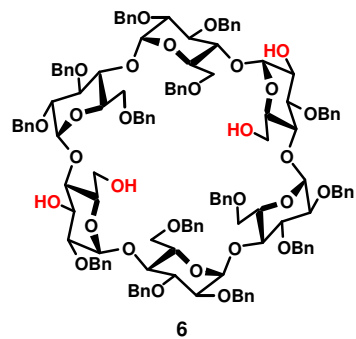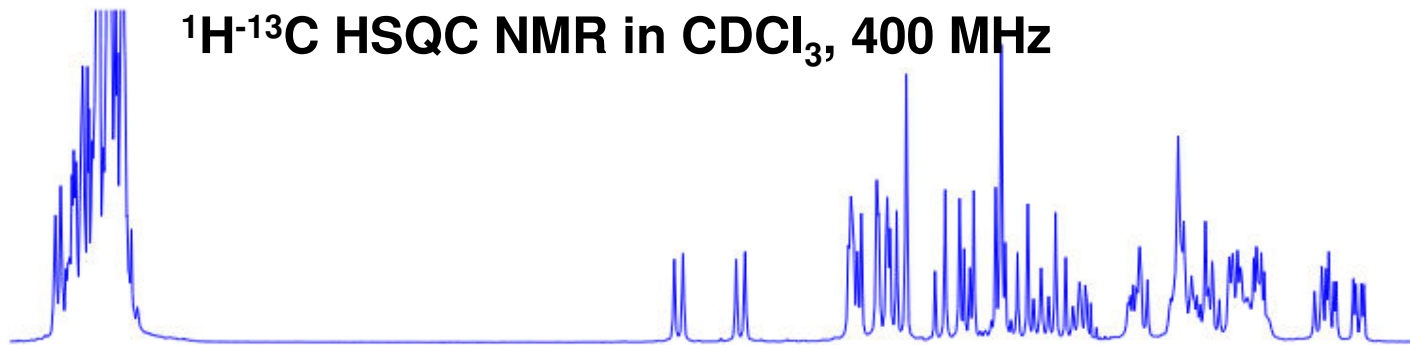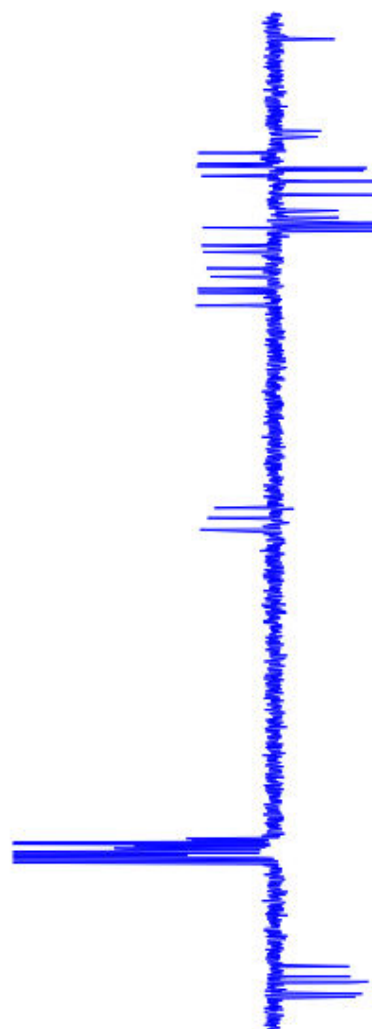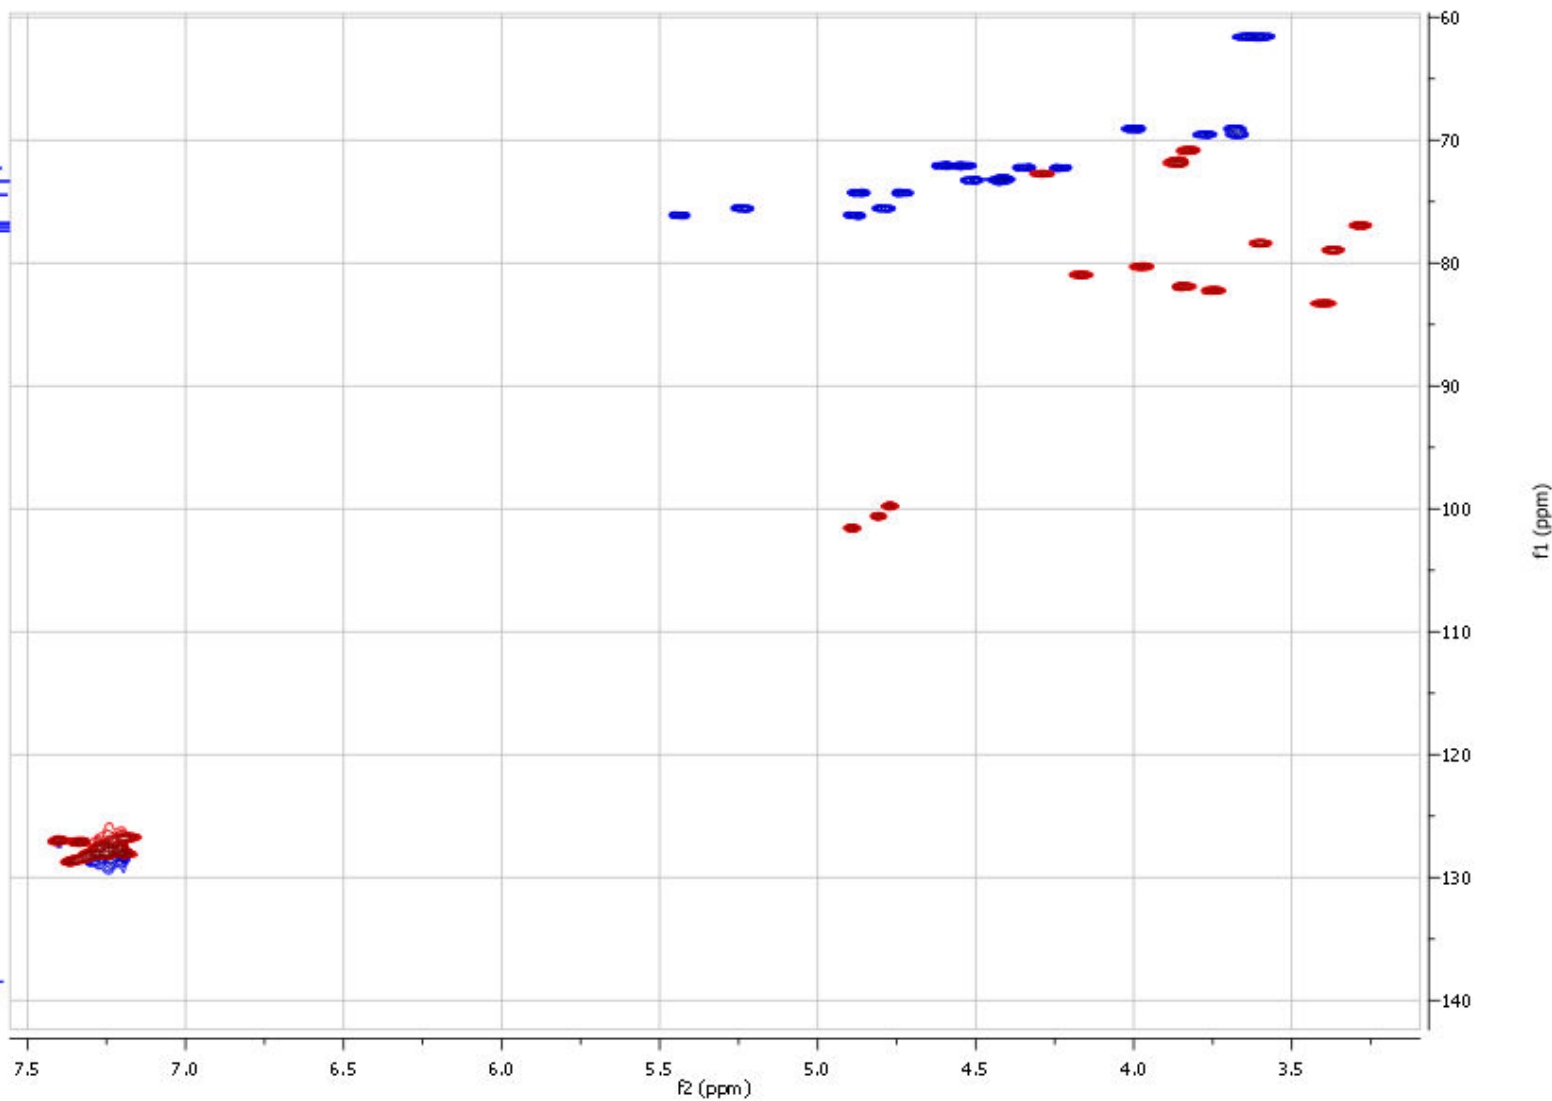

# $^1\text{H}$ - $^{13}\text{C}$ HSQC NMR in $\text{CDCl}_3$ , 400 MHz

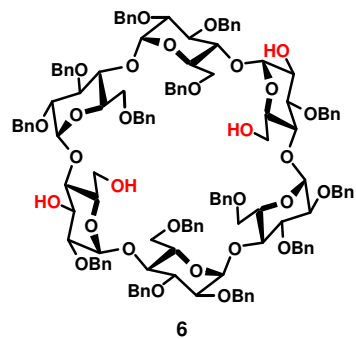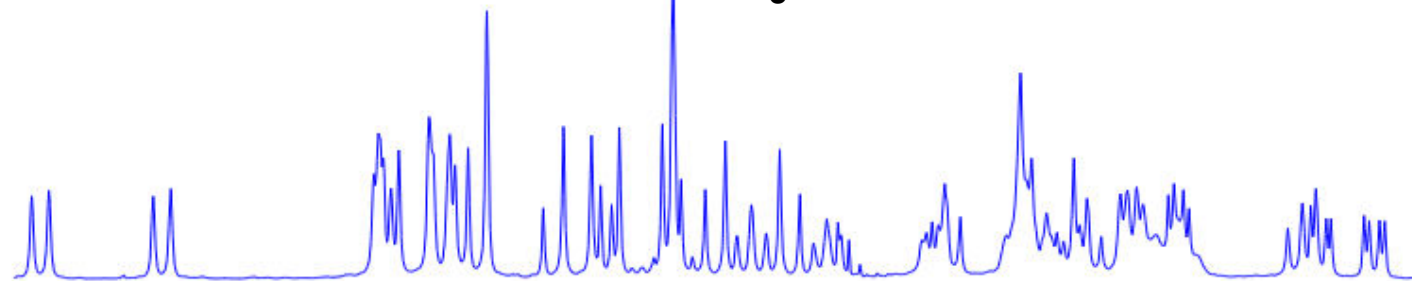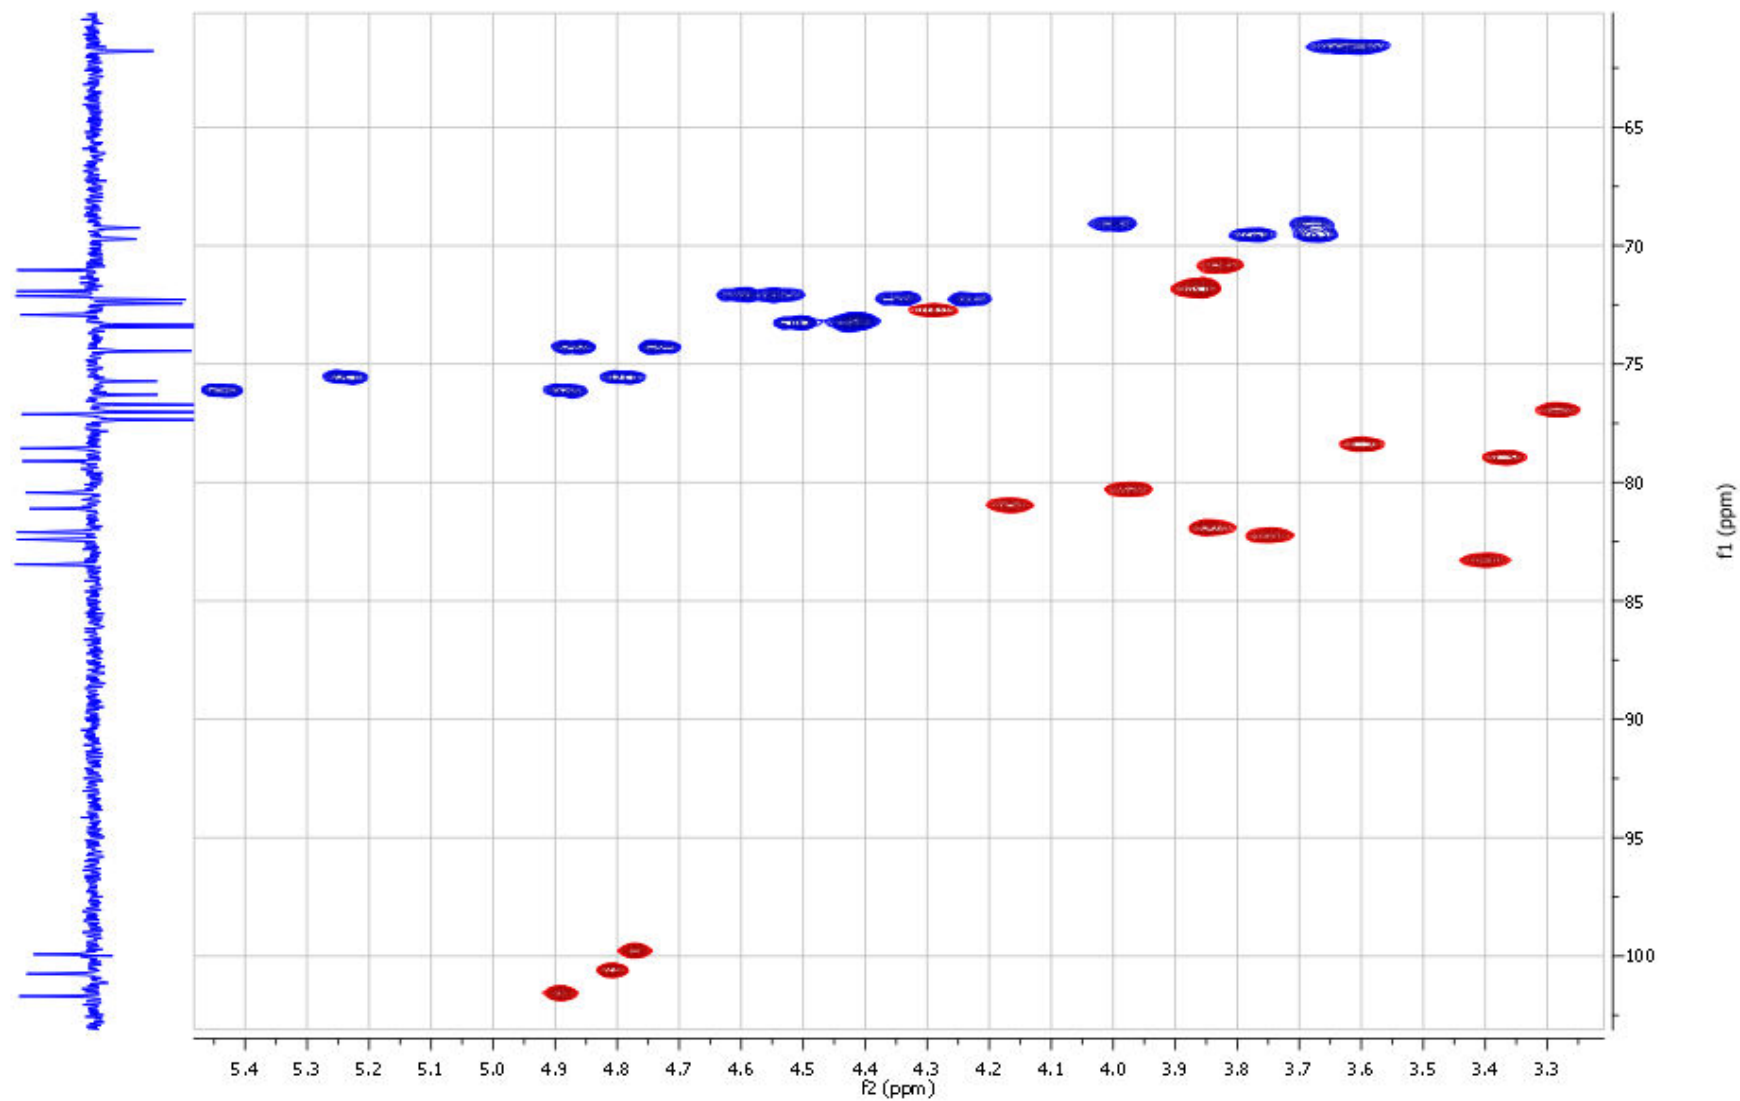

# $^1\text{H}$ NMR in $\text{CDCl}_3$ , 400 MHz

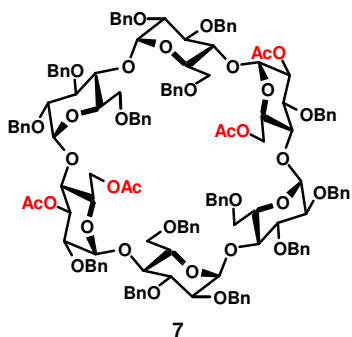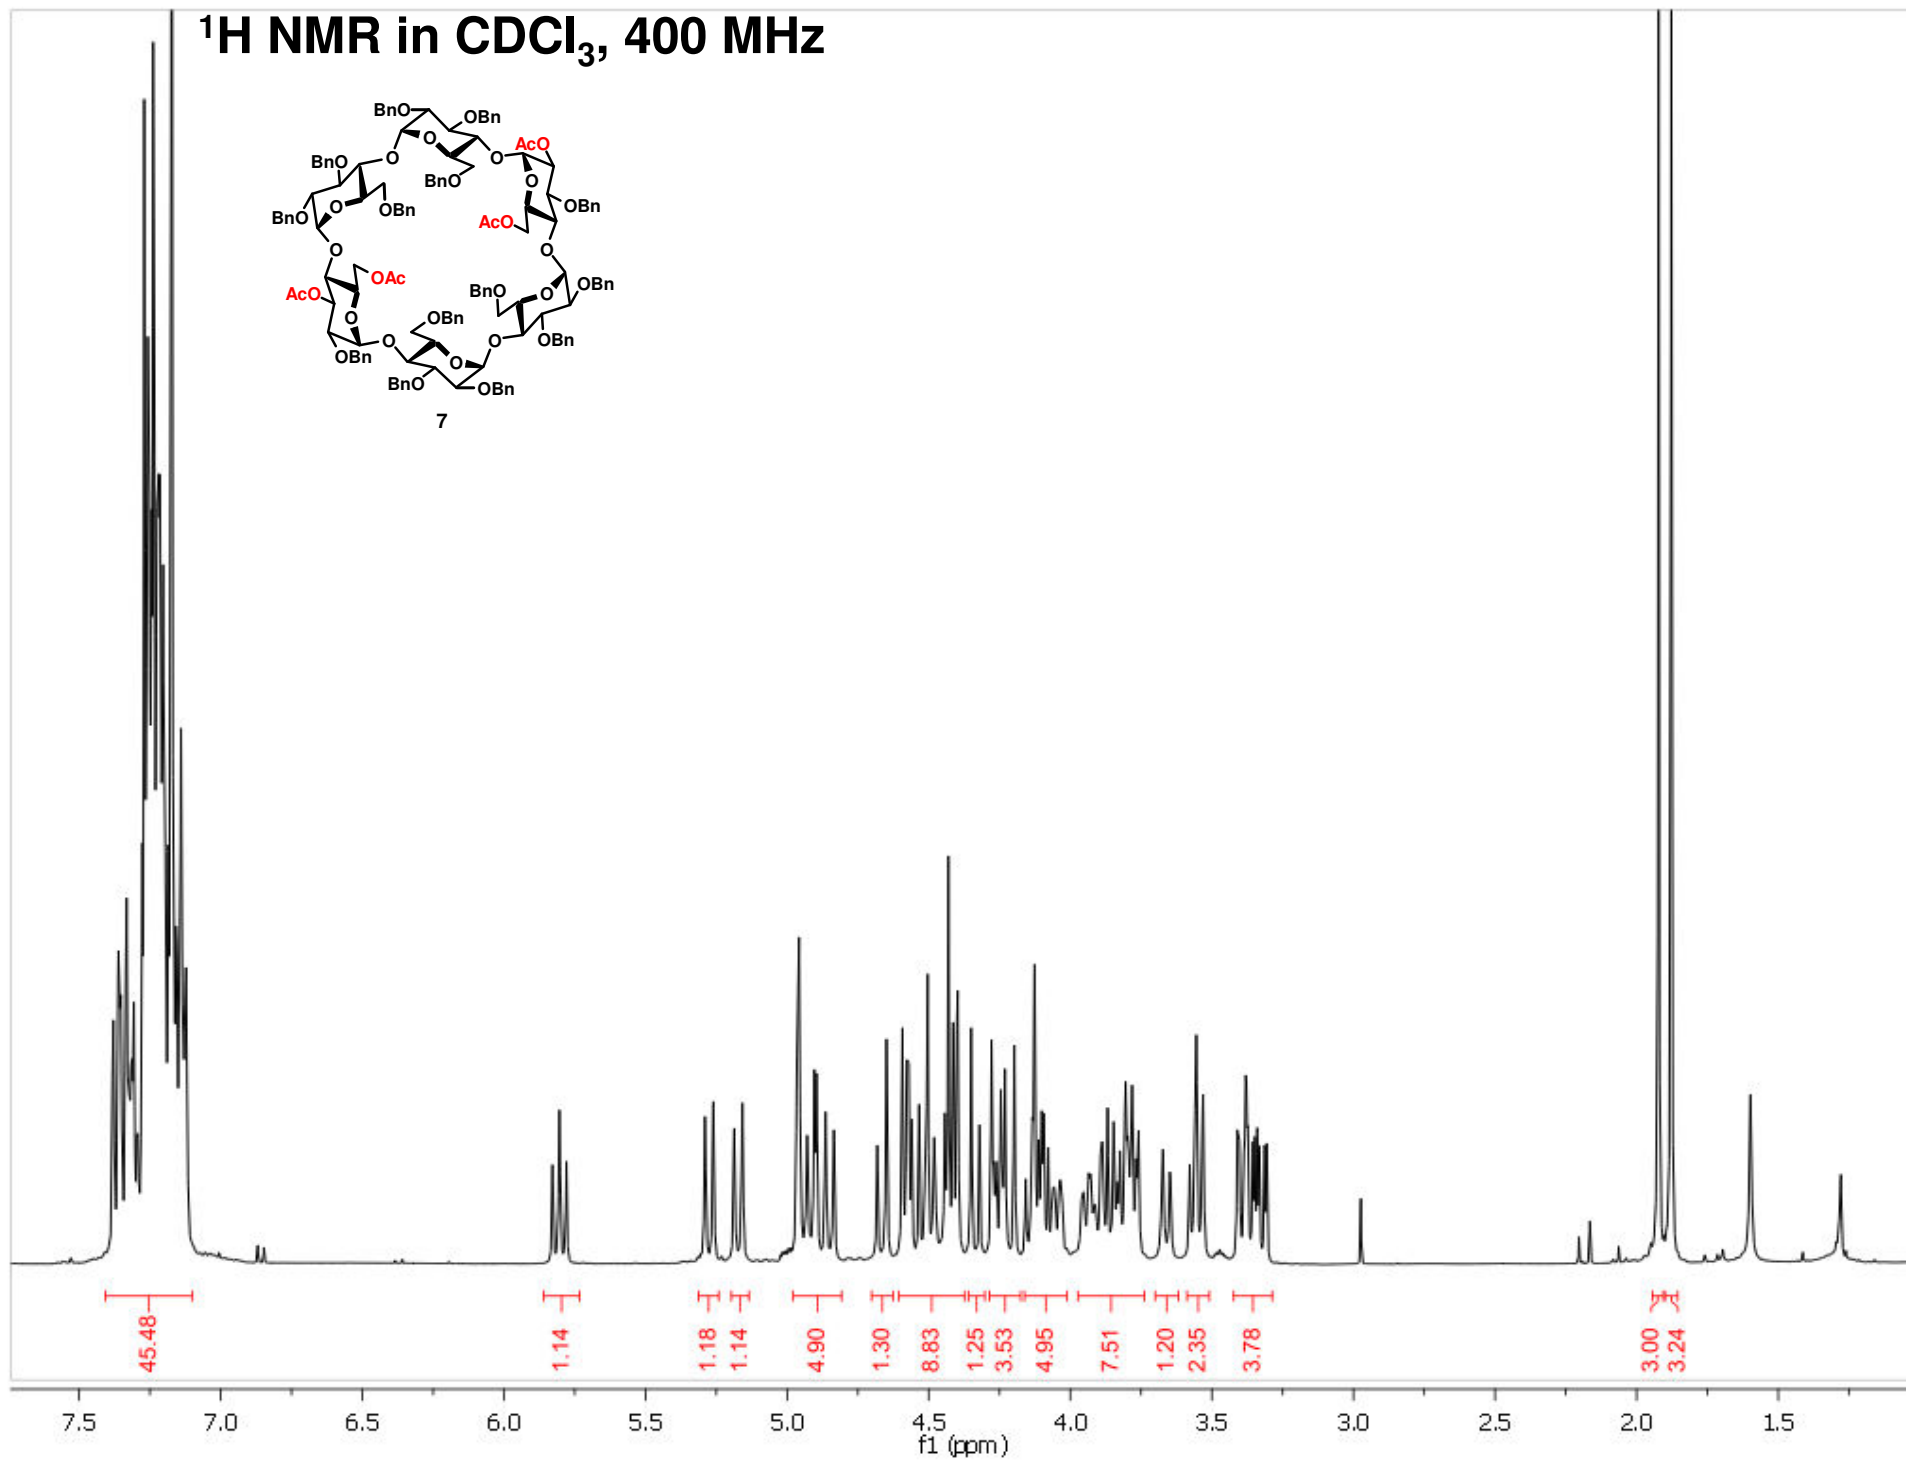

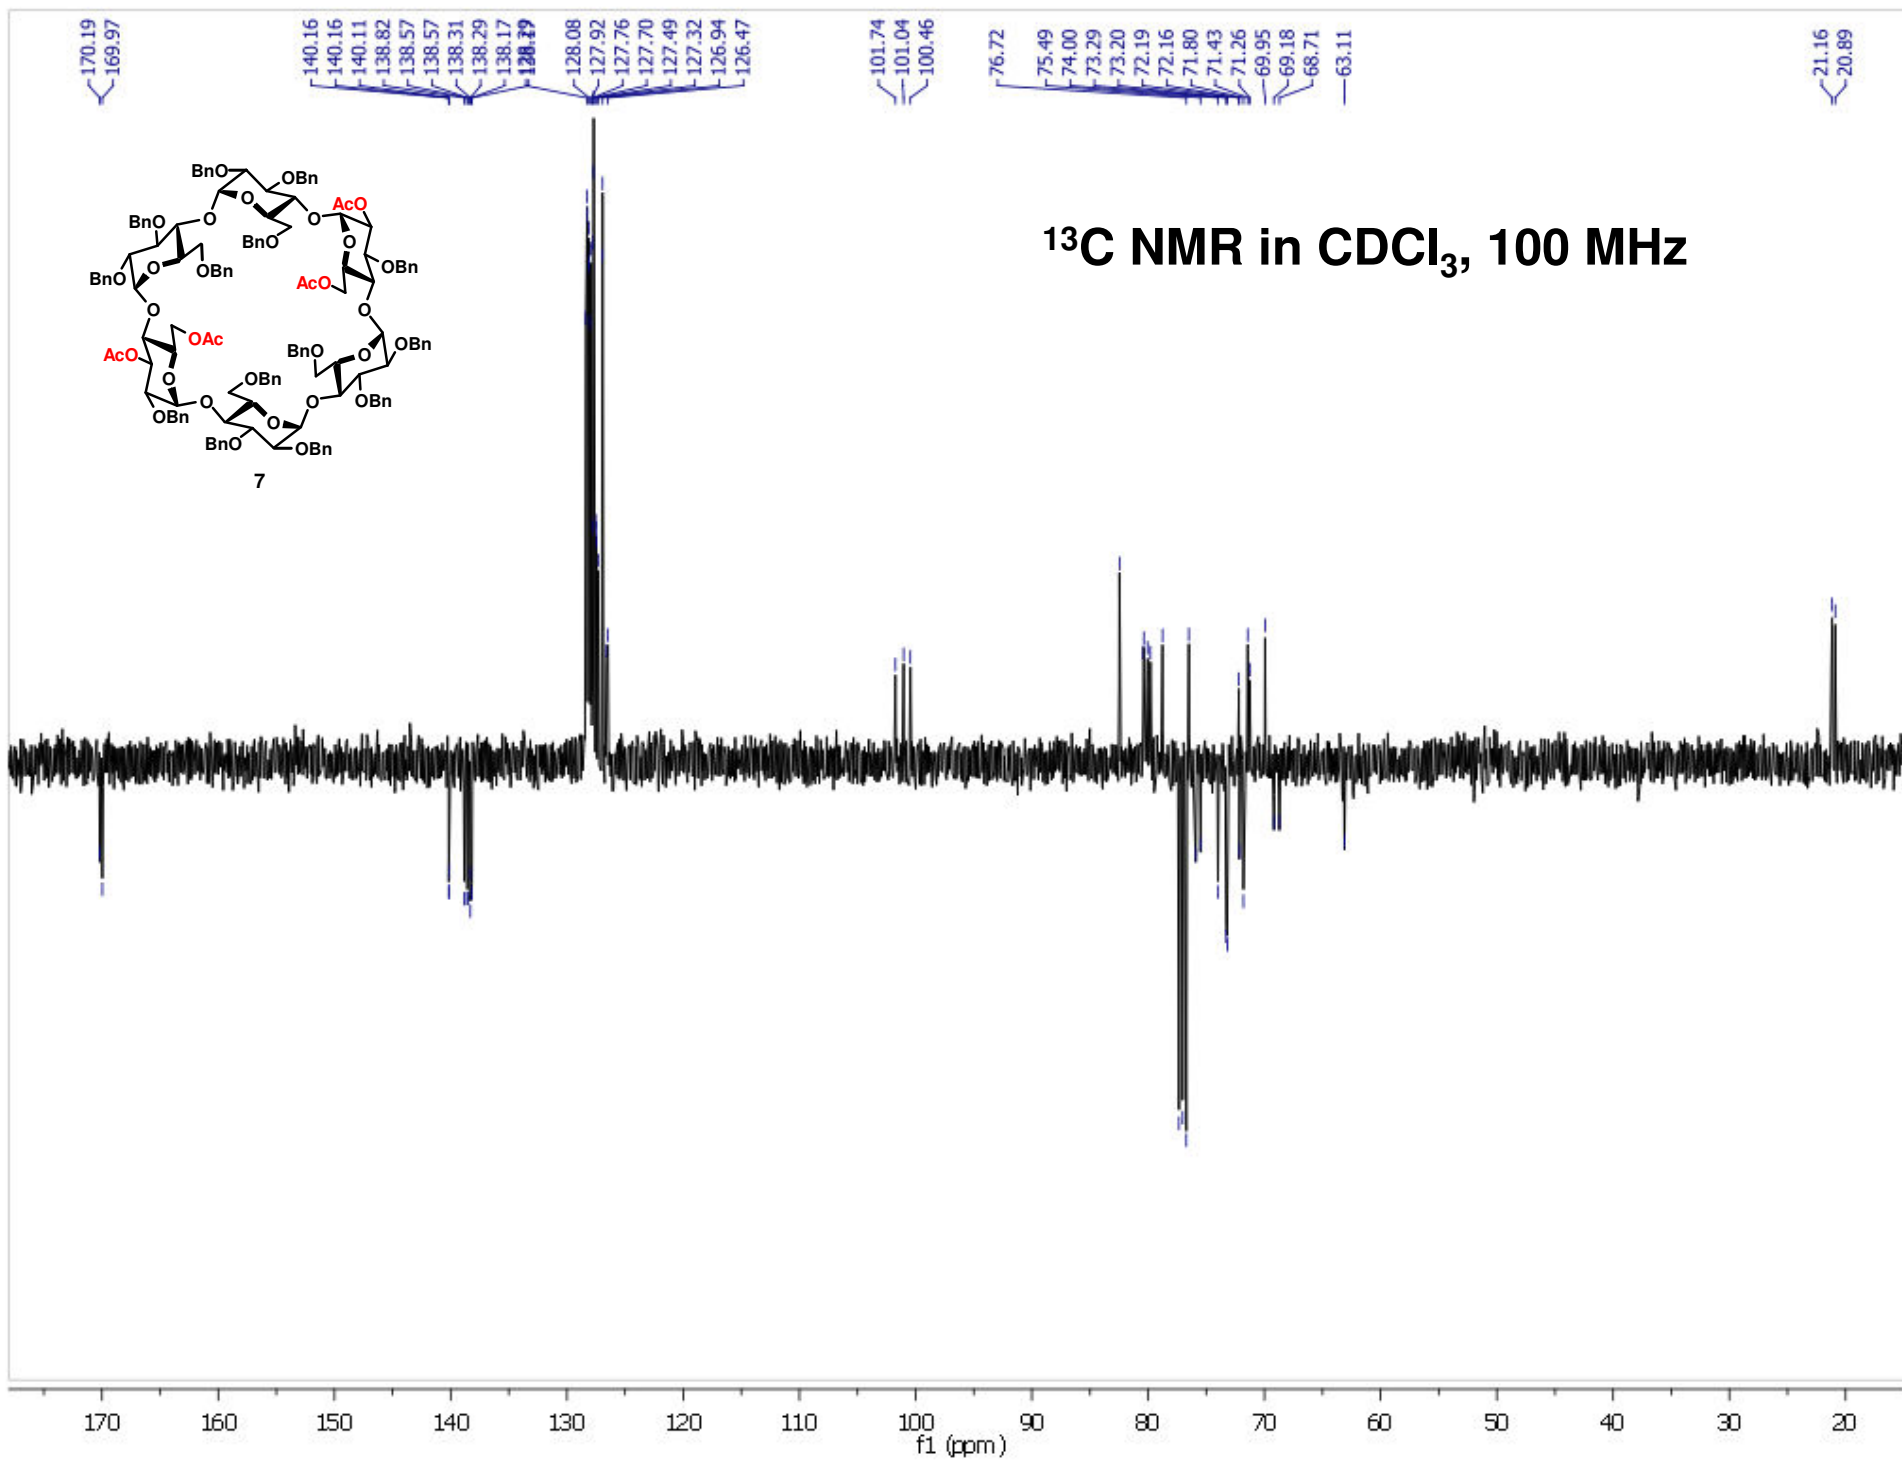







# $^1\text{H}$ - $^1\text{H}$ TOCSY NMR in $\text{CDCl}_3$ , 400 MHz

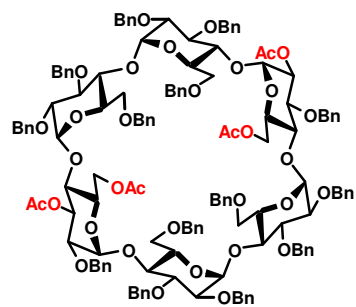

7

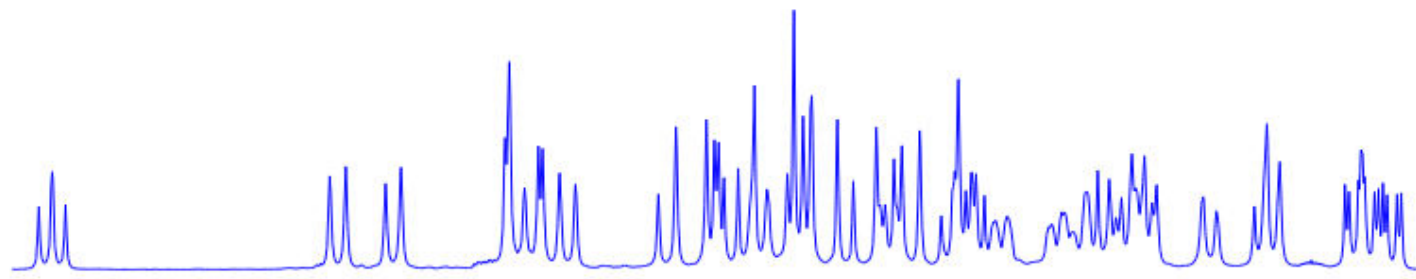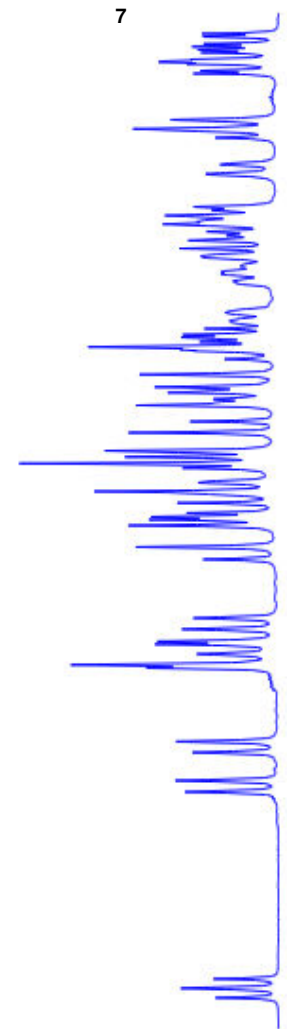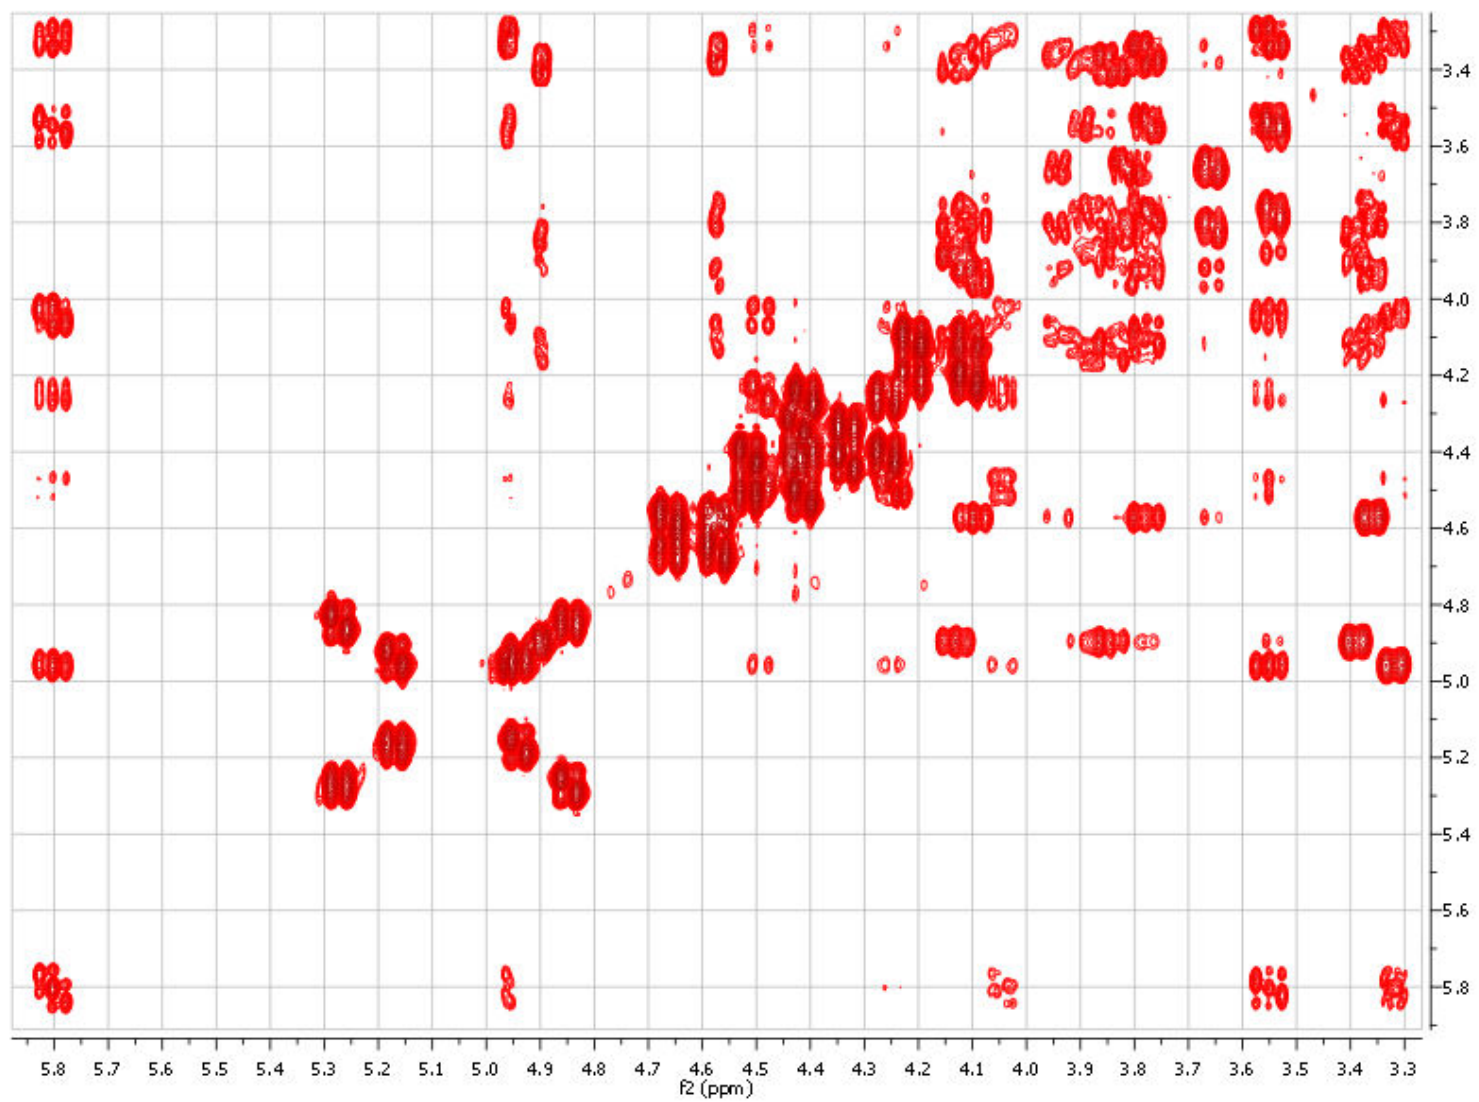

$f_1$  (ppm)

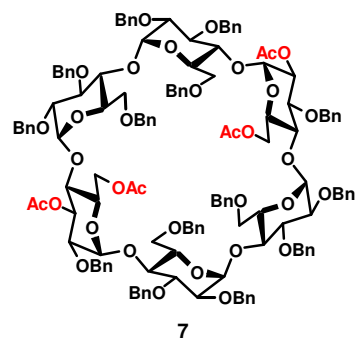

# $^1\text{H}$ - $^{13}\text{C}$ HSQC NMR in $\text{CDCl}_3$ , 400 MHz

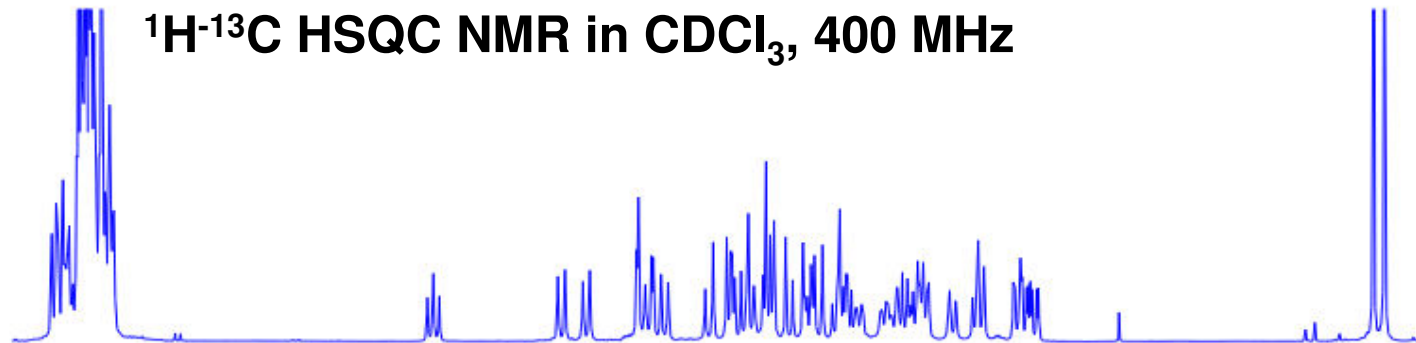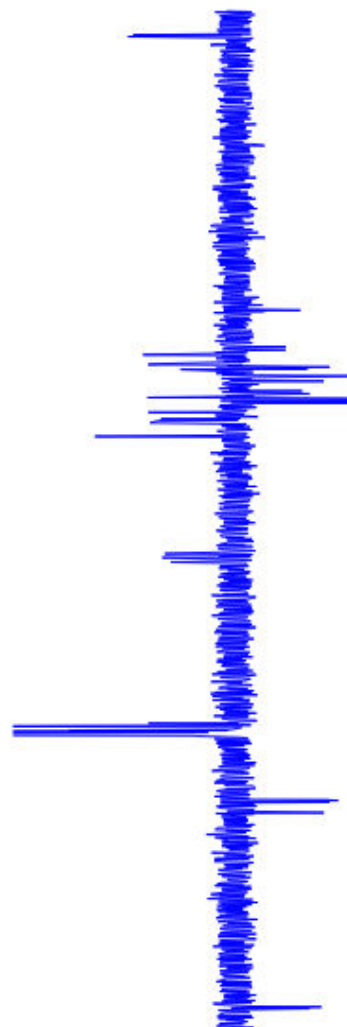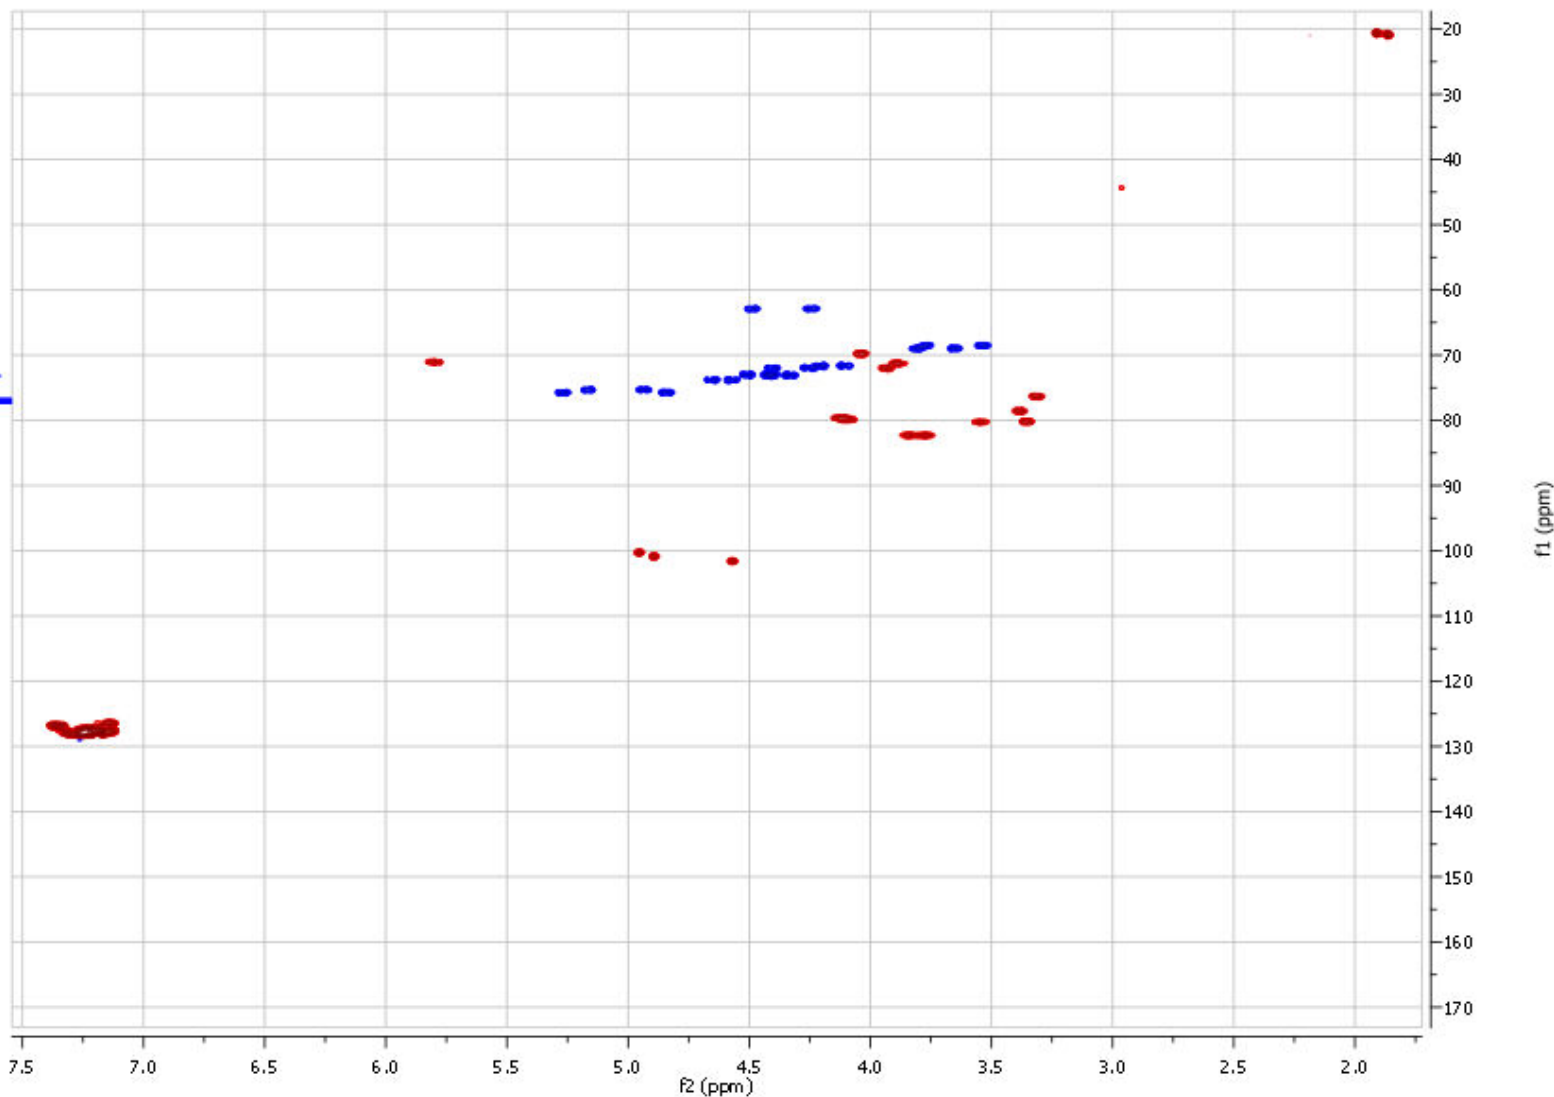

# $^1\text{H}$ - $^{13}\text{C}$ HSQC NMR in $\text{CDCl}_3$ , 400 MHz

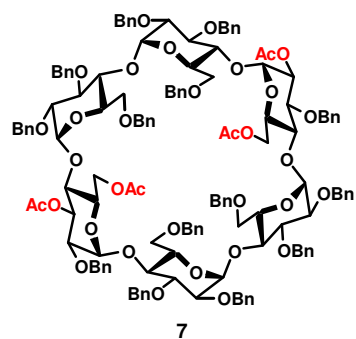

7

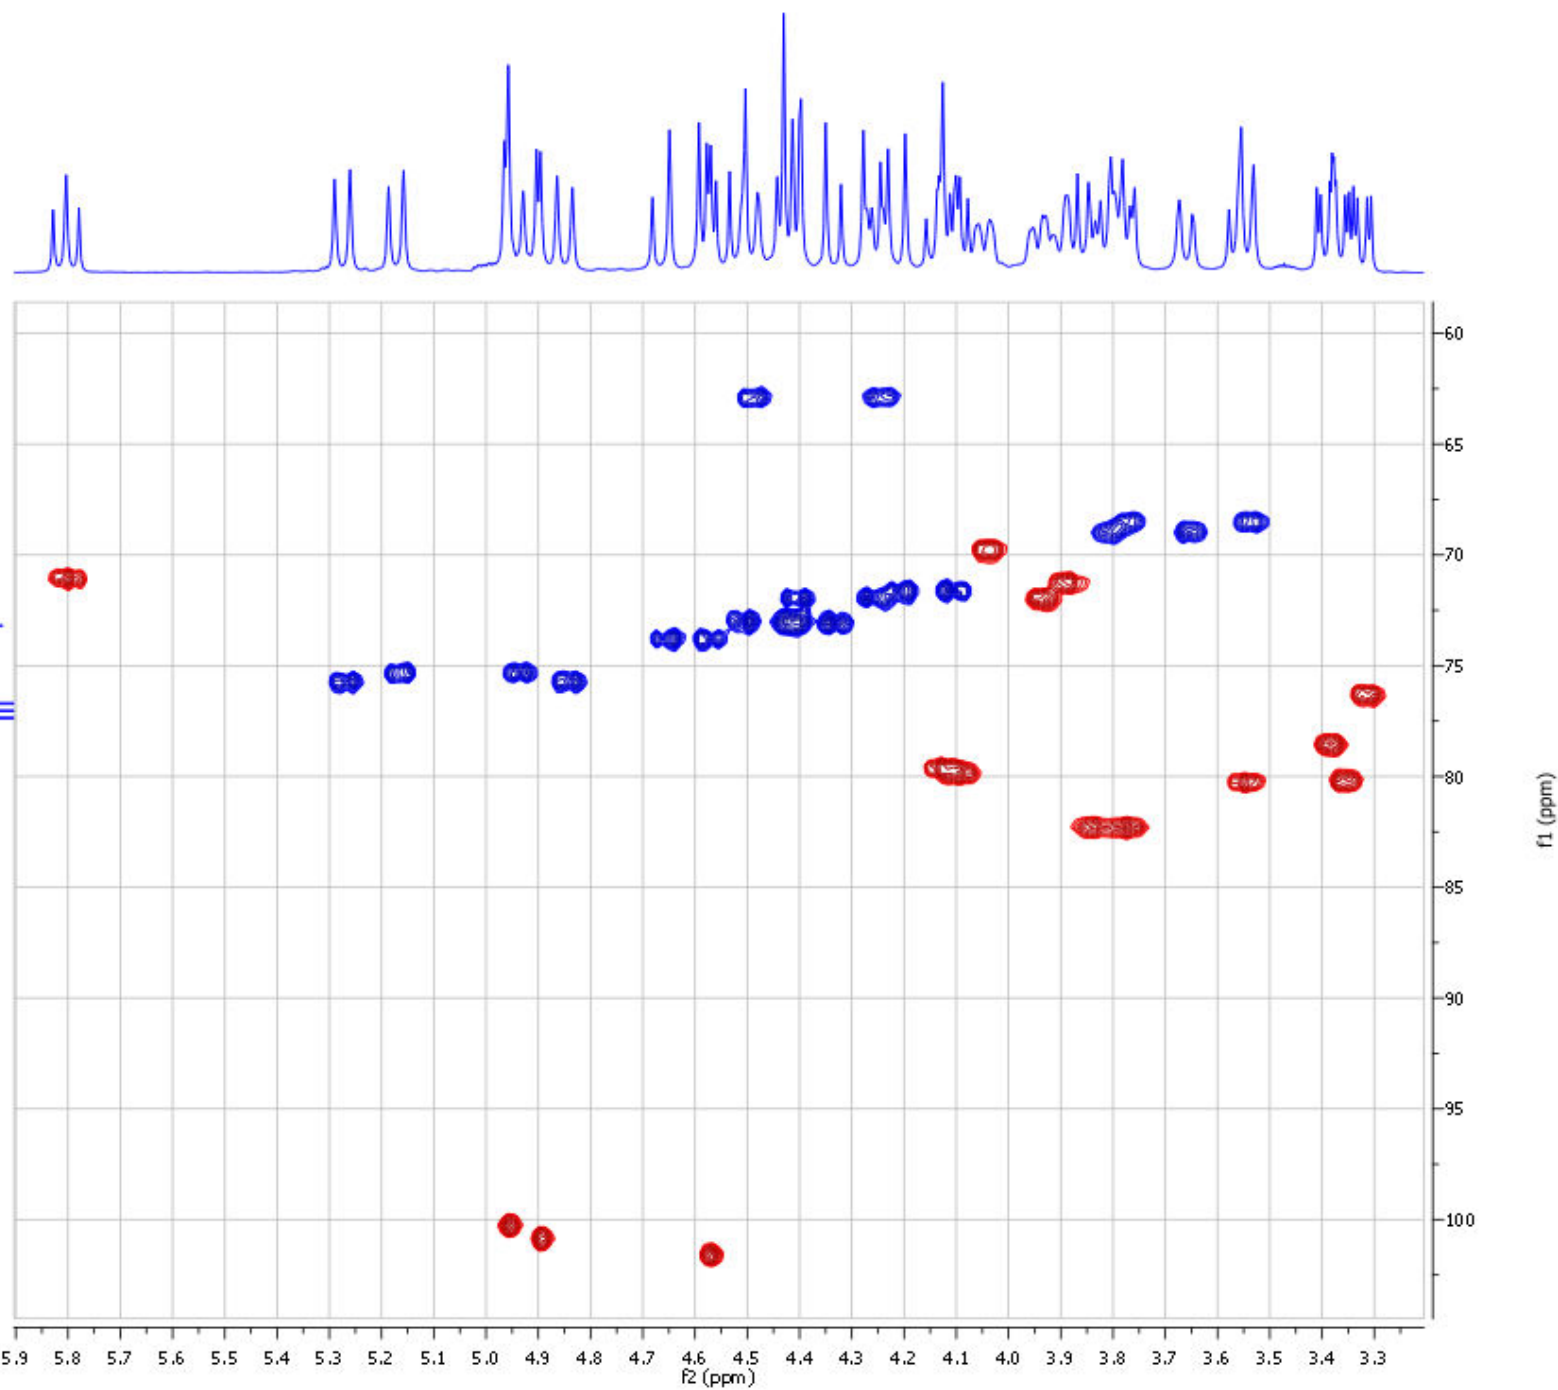

# <sup>1</sup>H NMR in CDCl<sub>3</sub>, 400 MHz

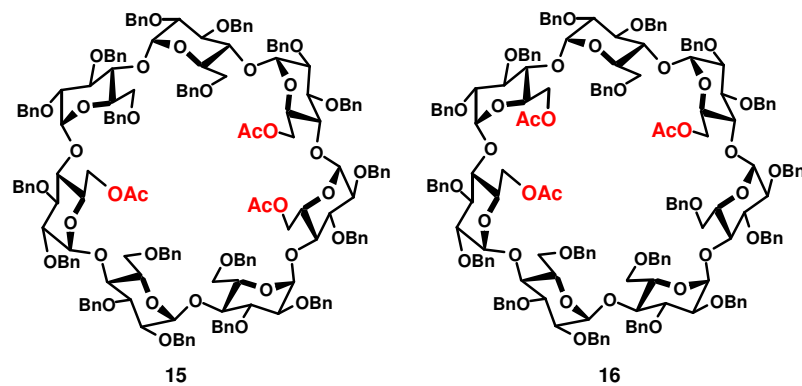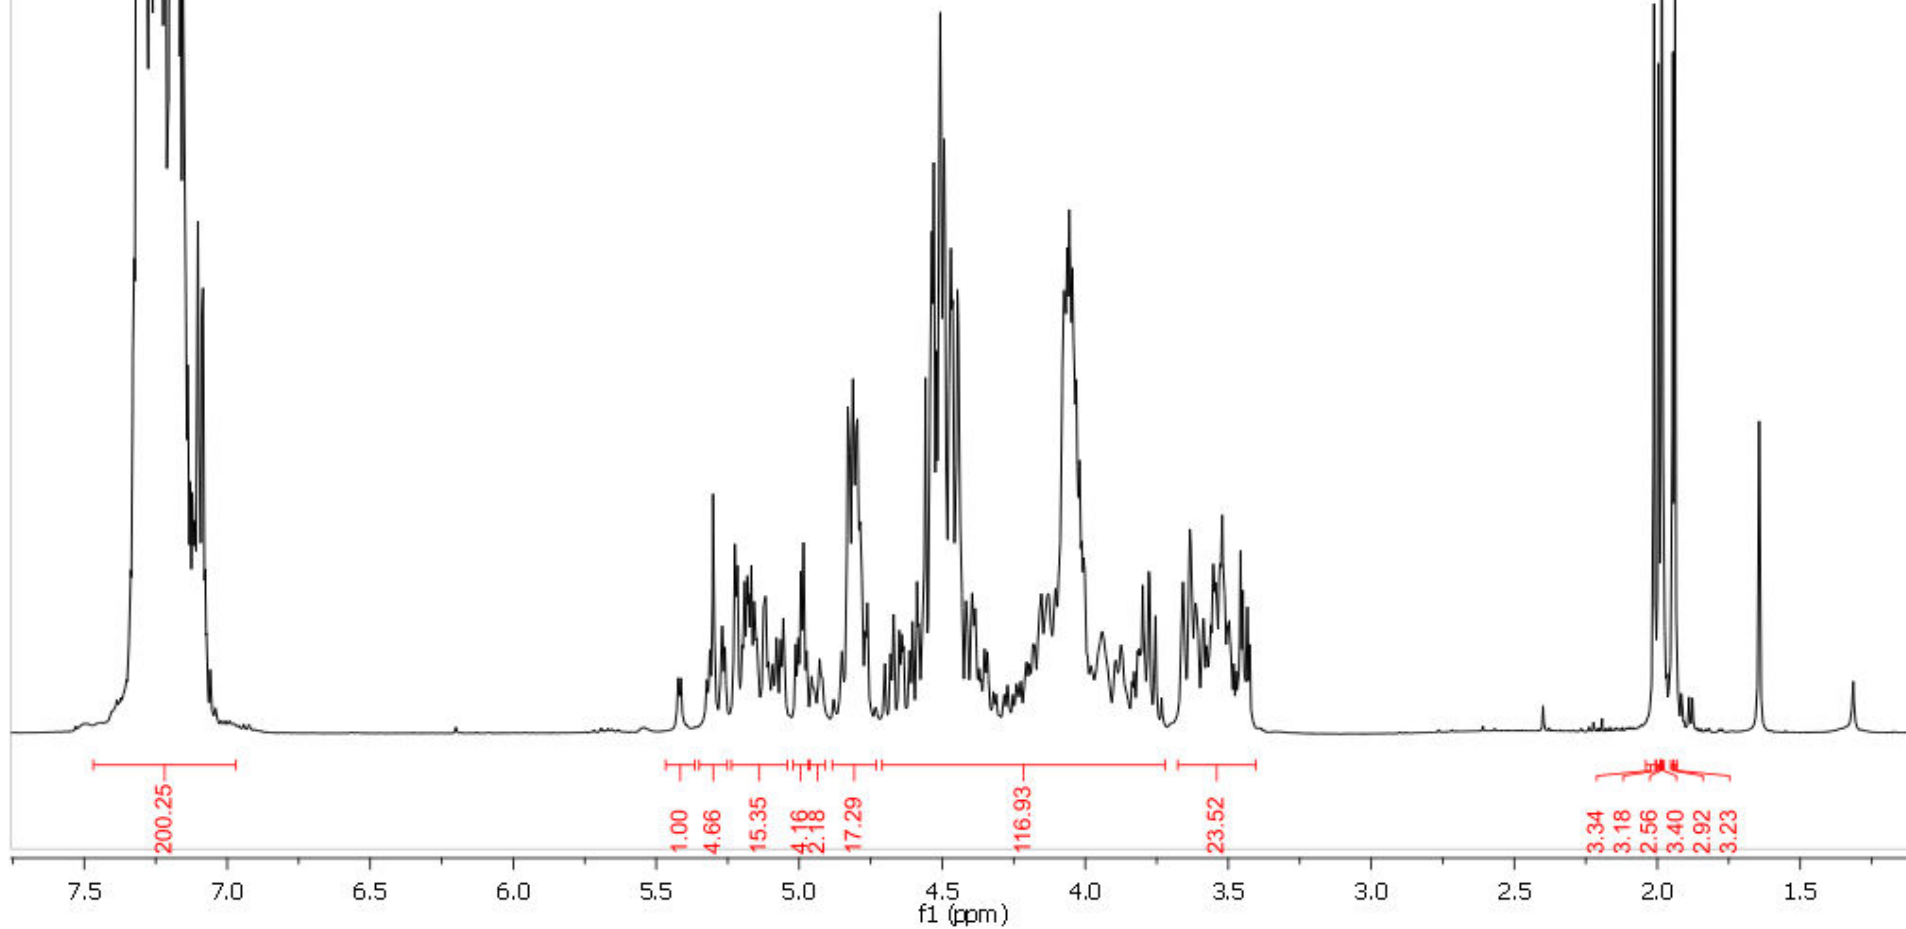



# $^{13}\text{C}$ NMR in $\text{CDCl}_3$ , 100 MHz

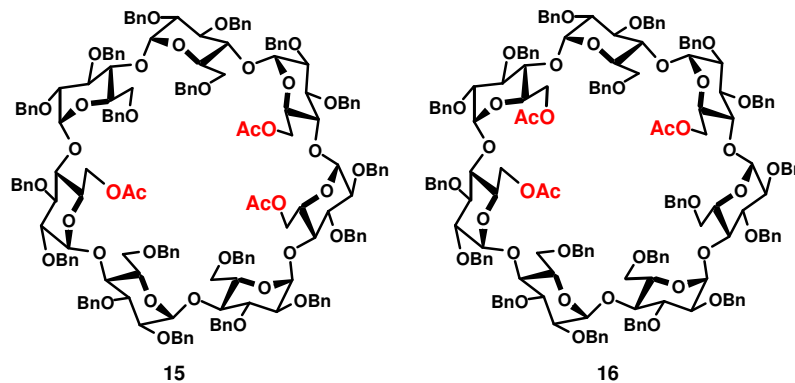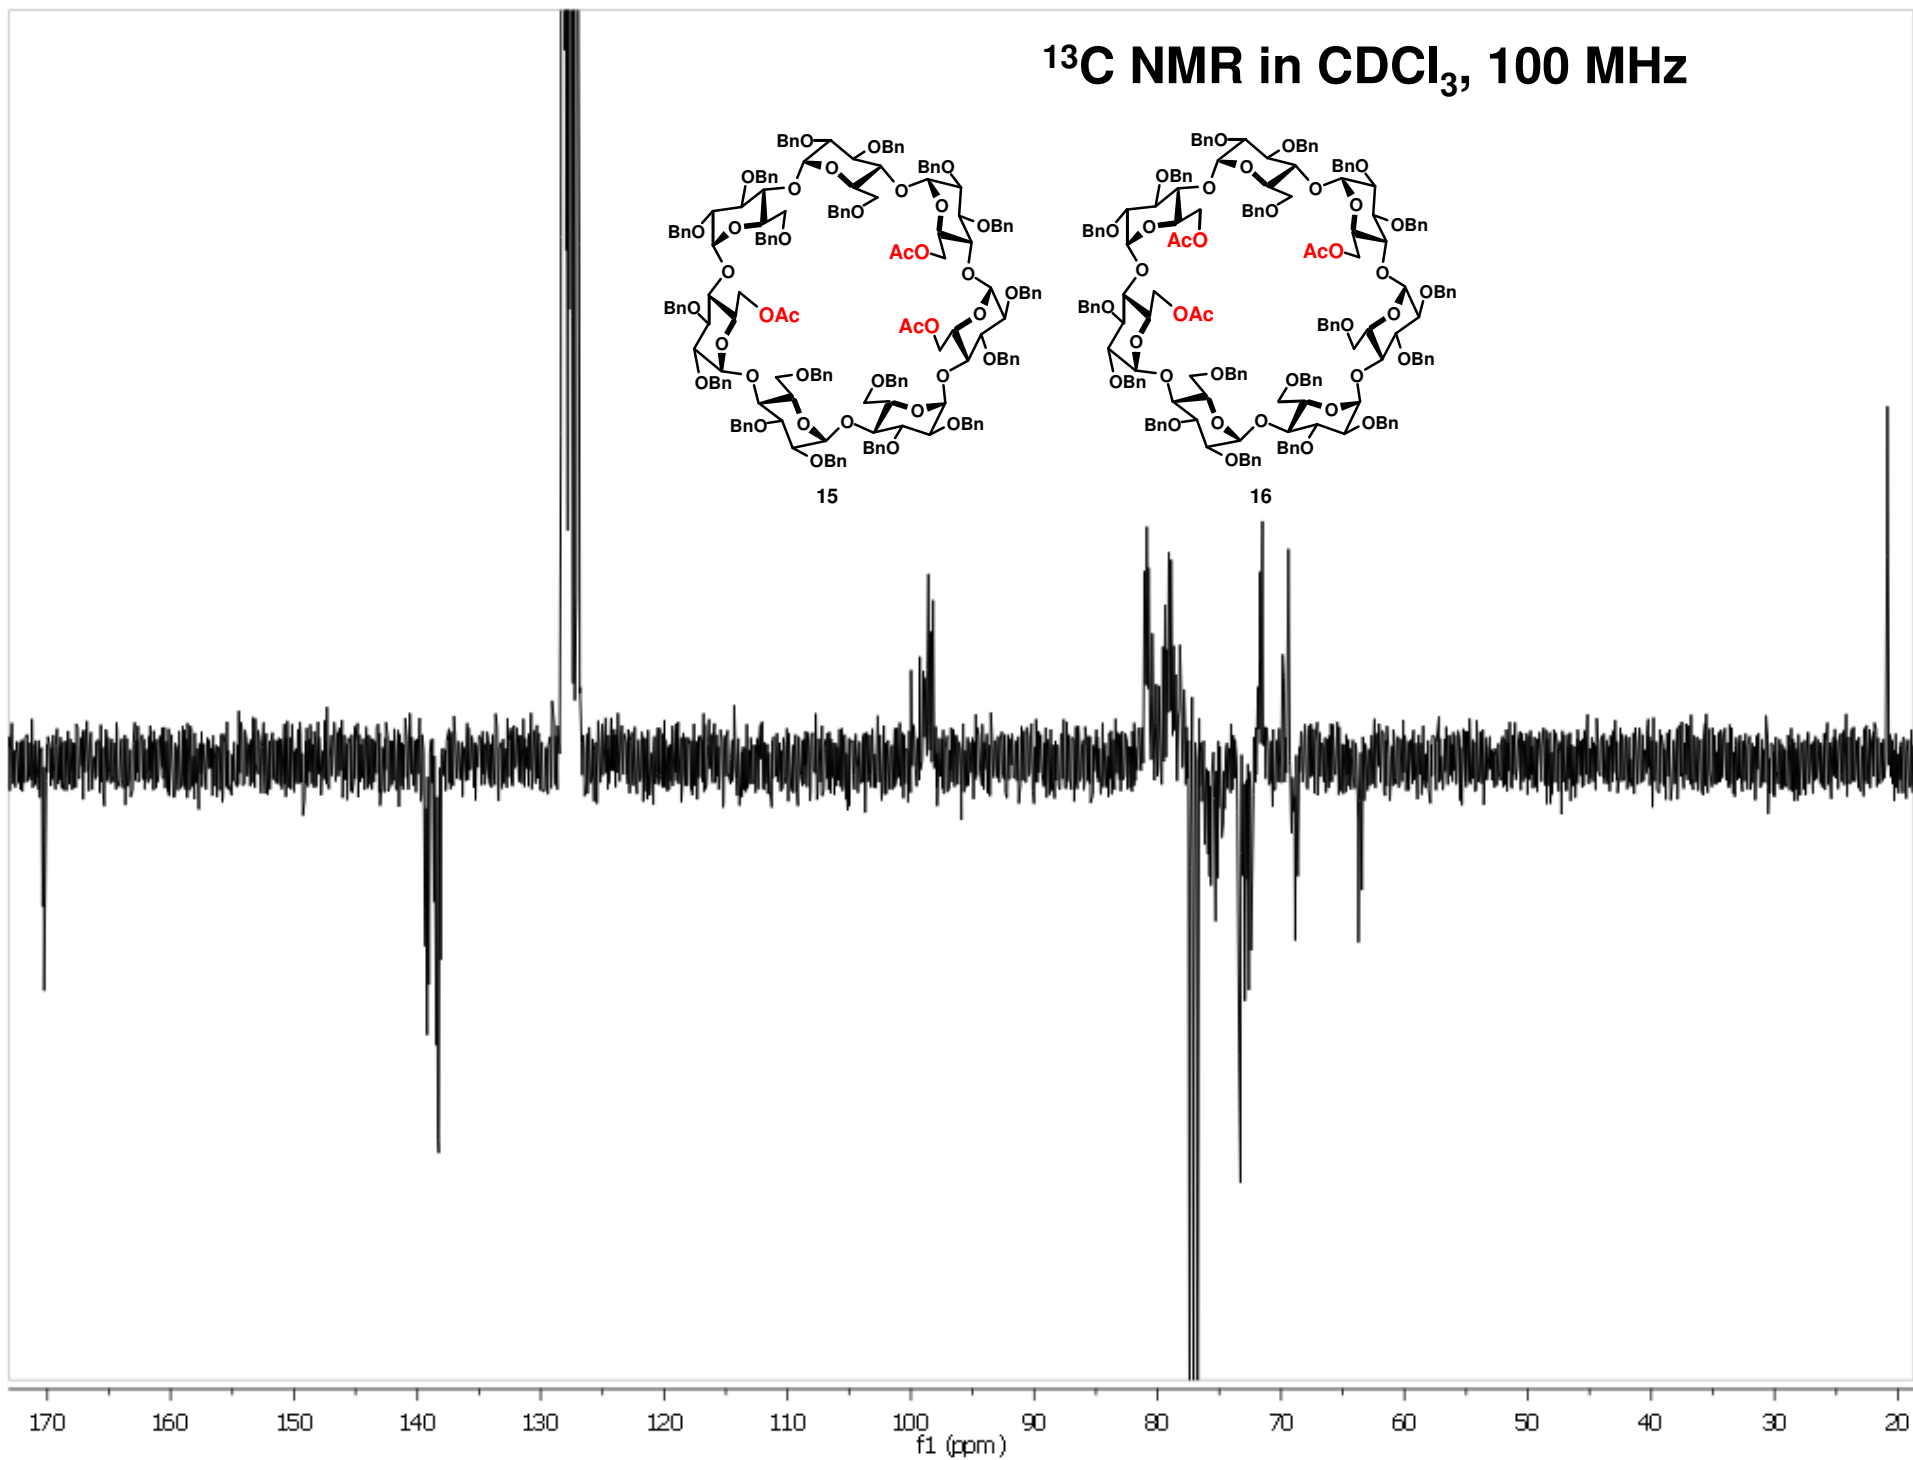

# $^1\text{H}$ NMR in $\text{CD}_3\text{OD}$ , 400 MHz

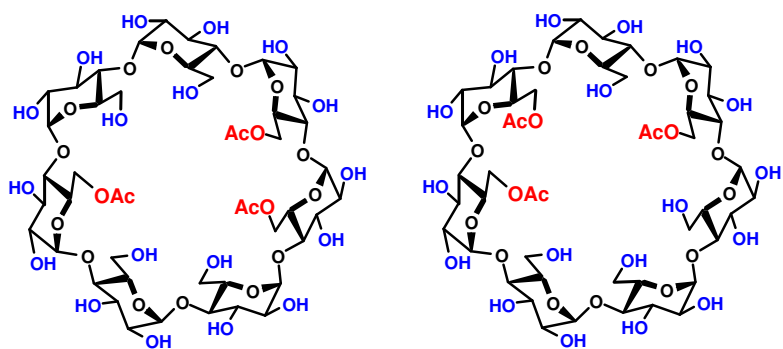

1 : 1 Mixture

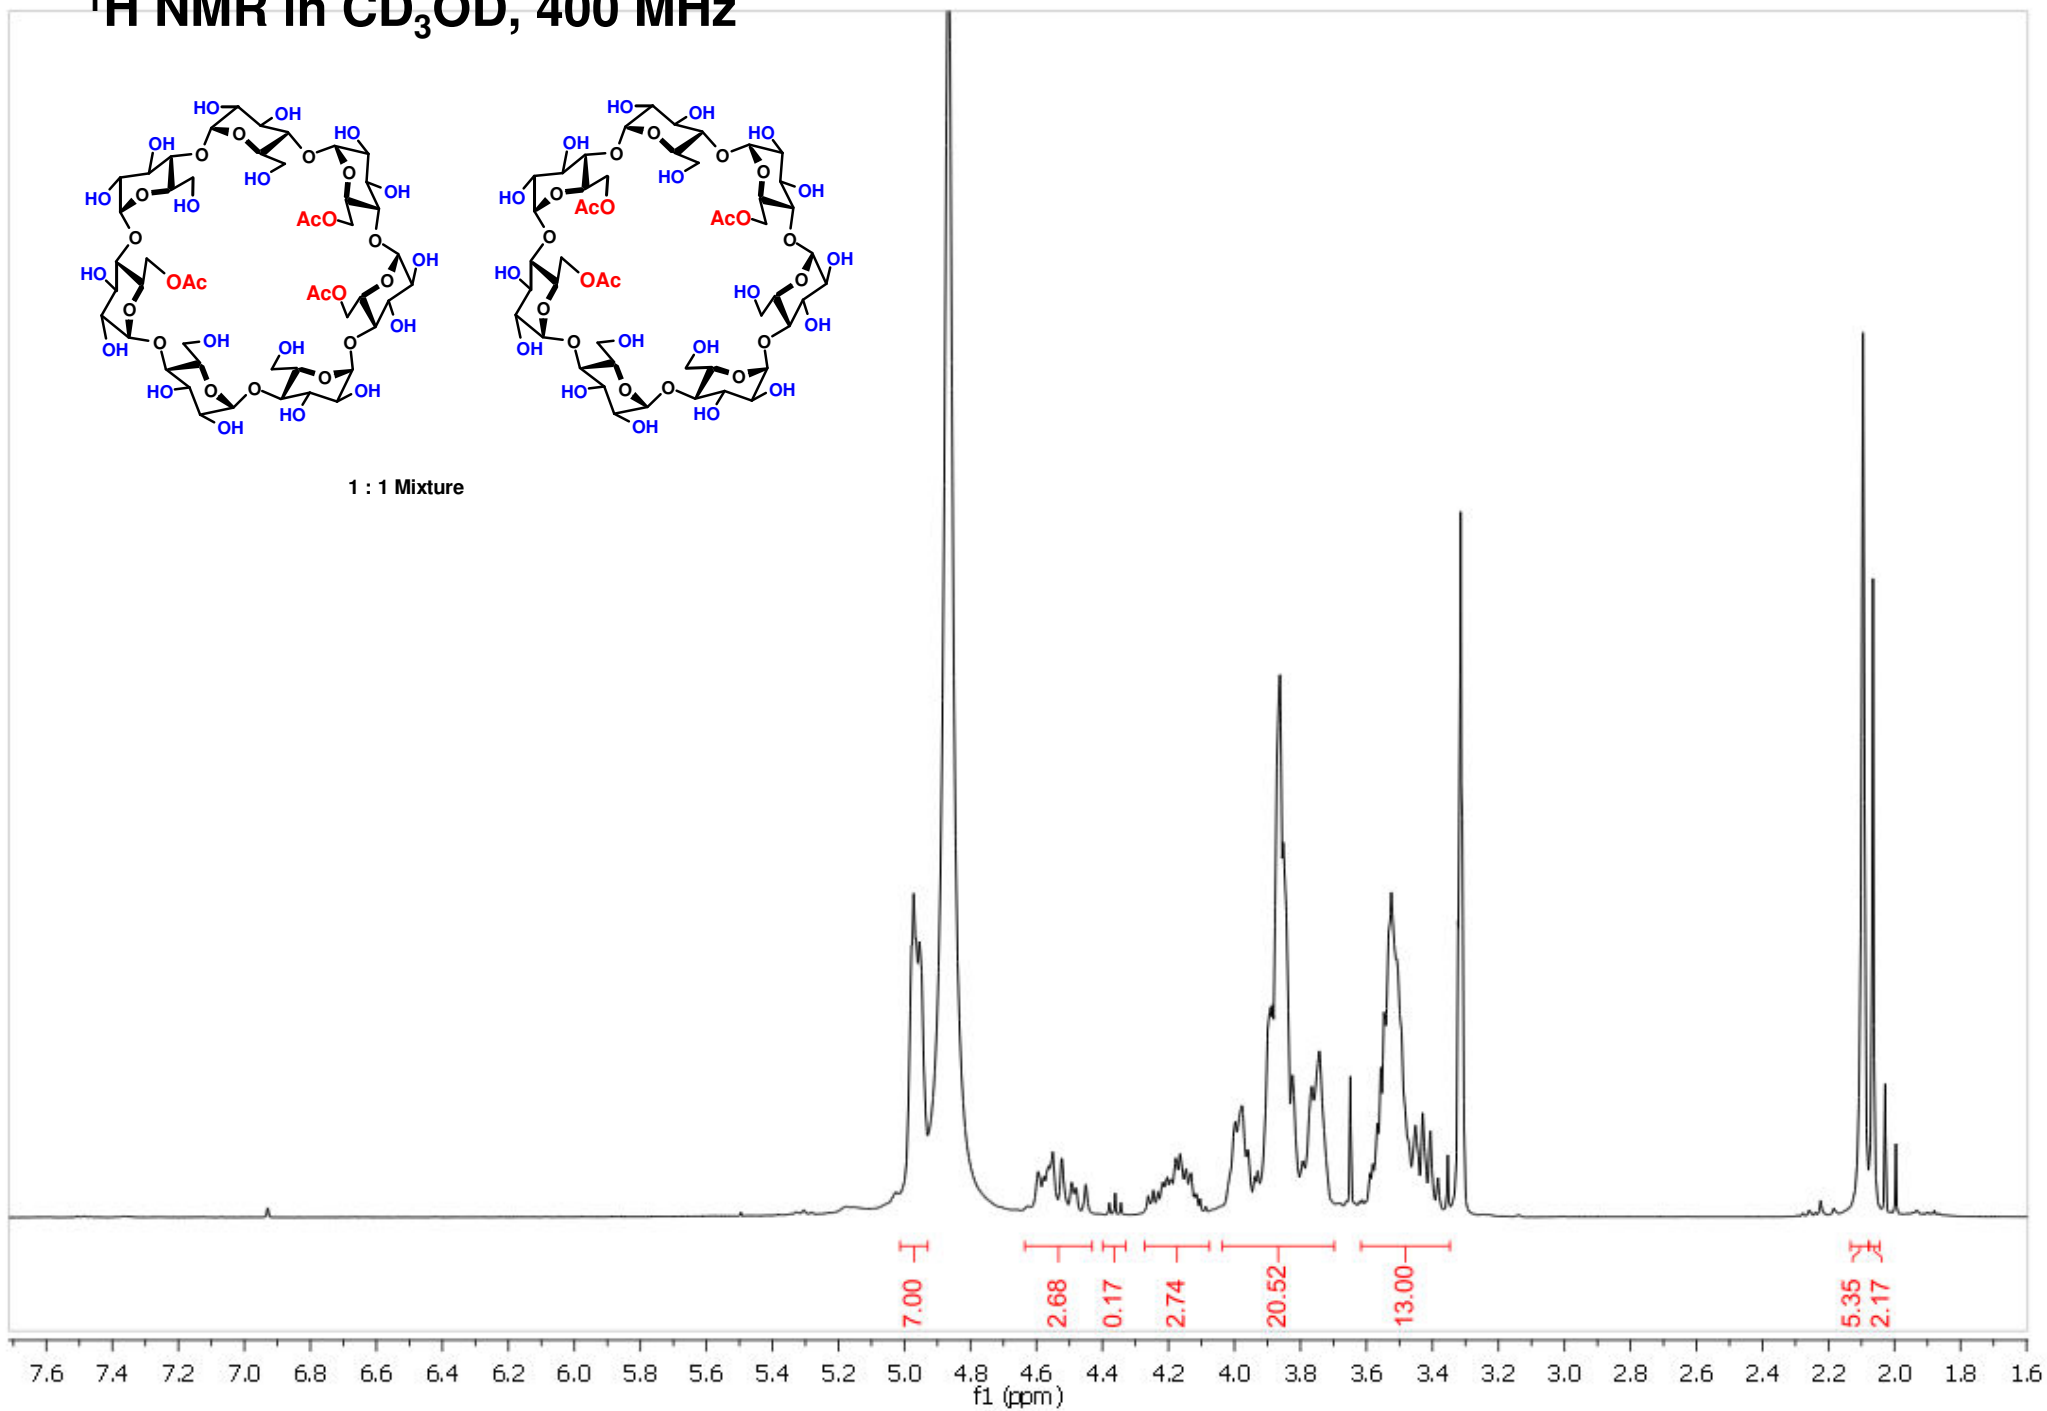



**$^{13}\text{C}$  NMR in  $\text{CD}_3\text{OD}$ , 100 MHz**

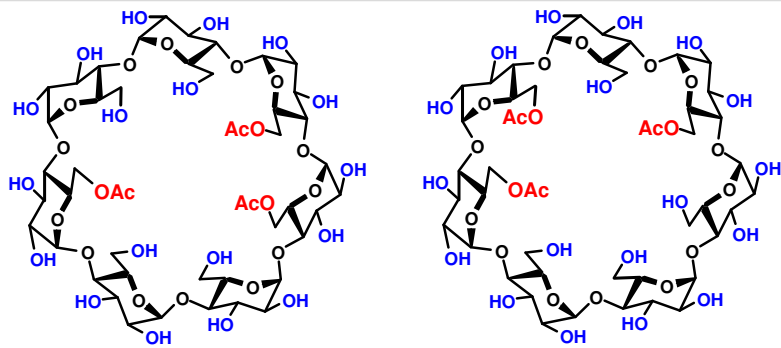

1 : 1 Mixture

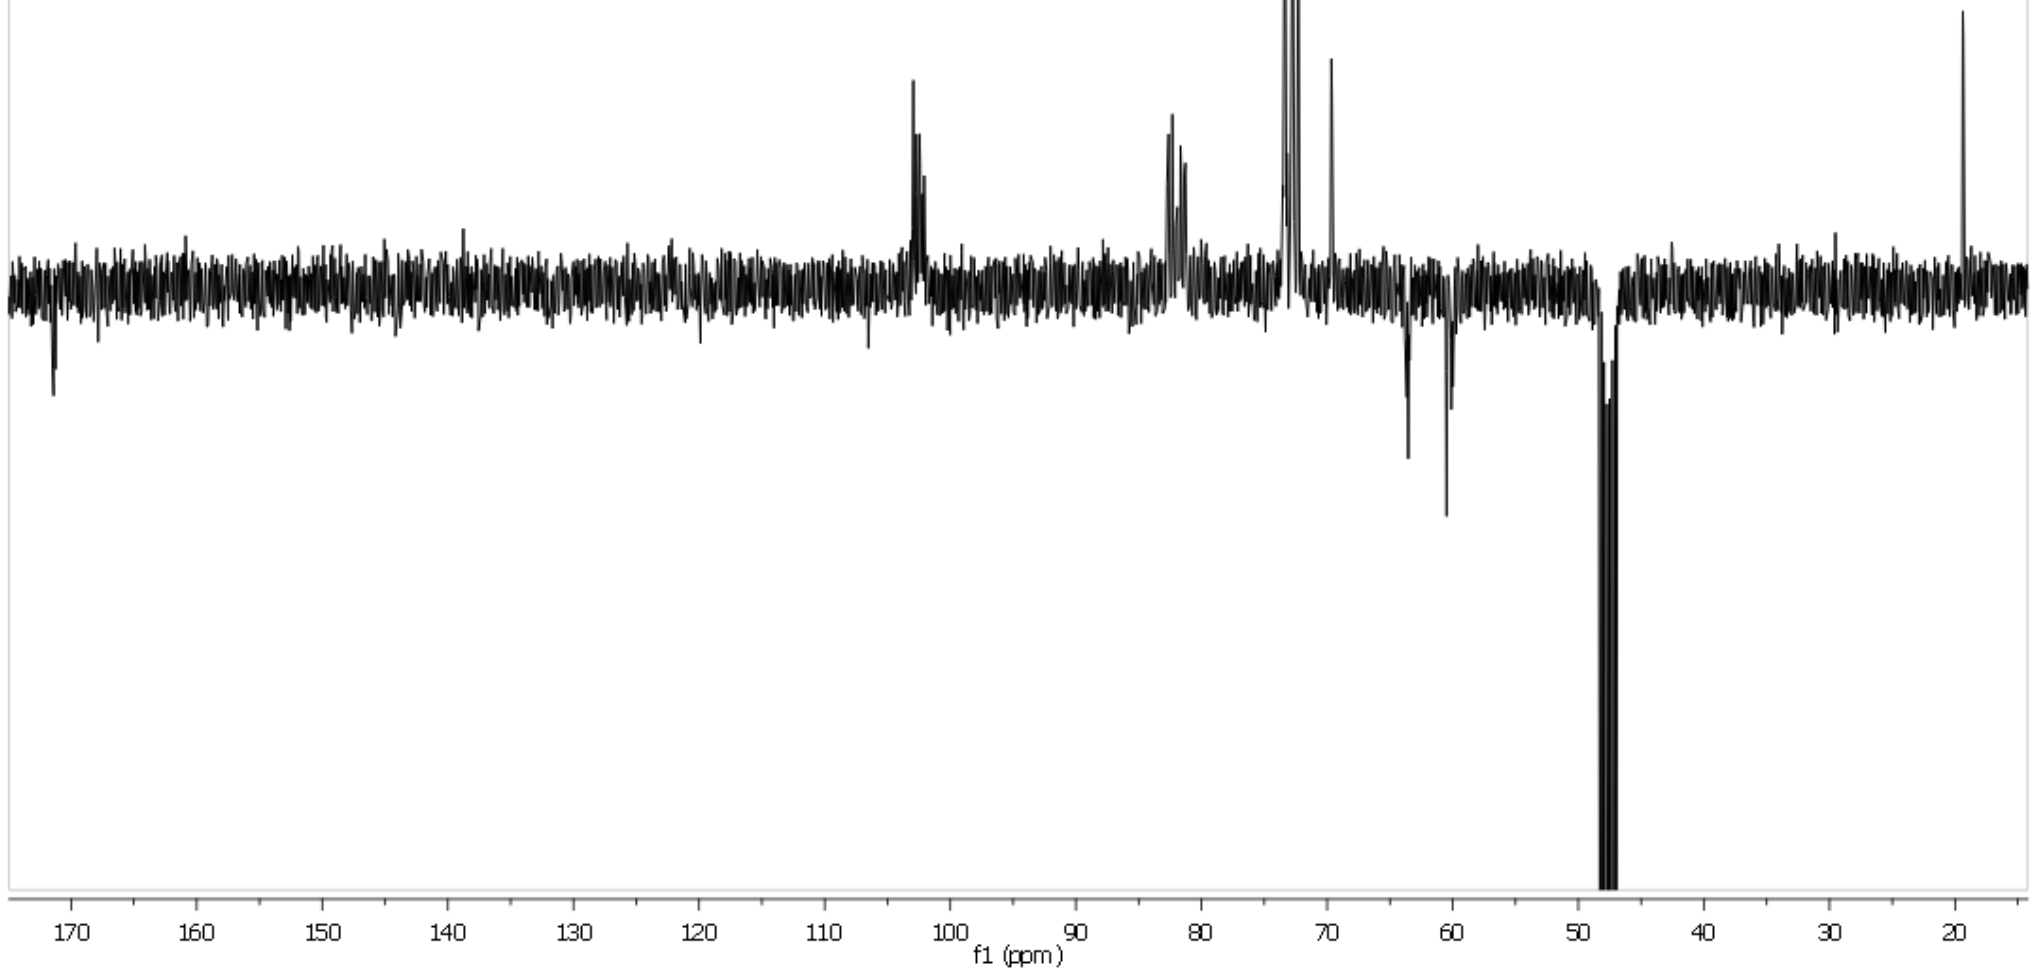

# $^1\text{H}$ NMR in $\text{CDCl}_3$ , 400 MHz

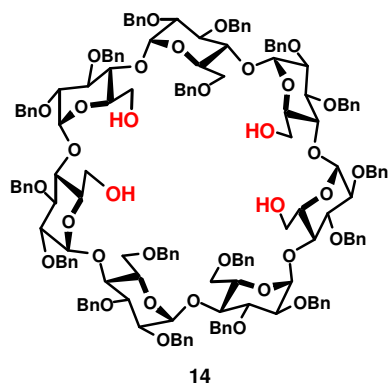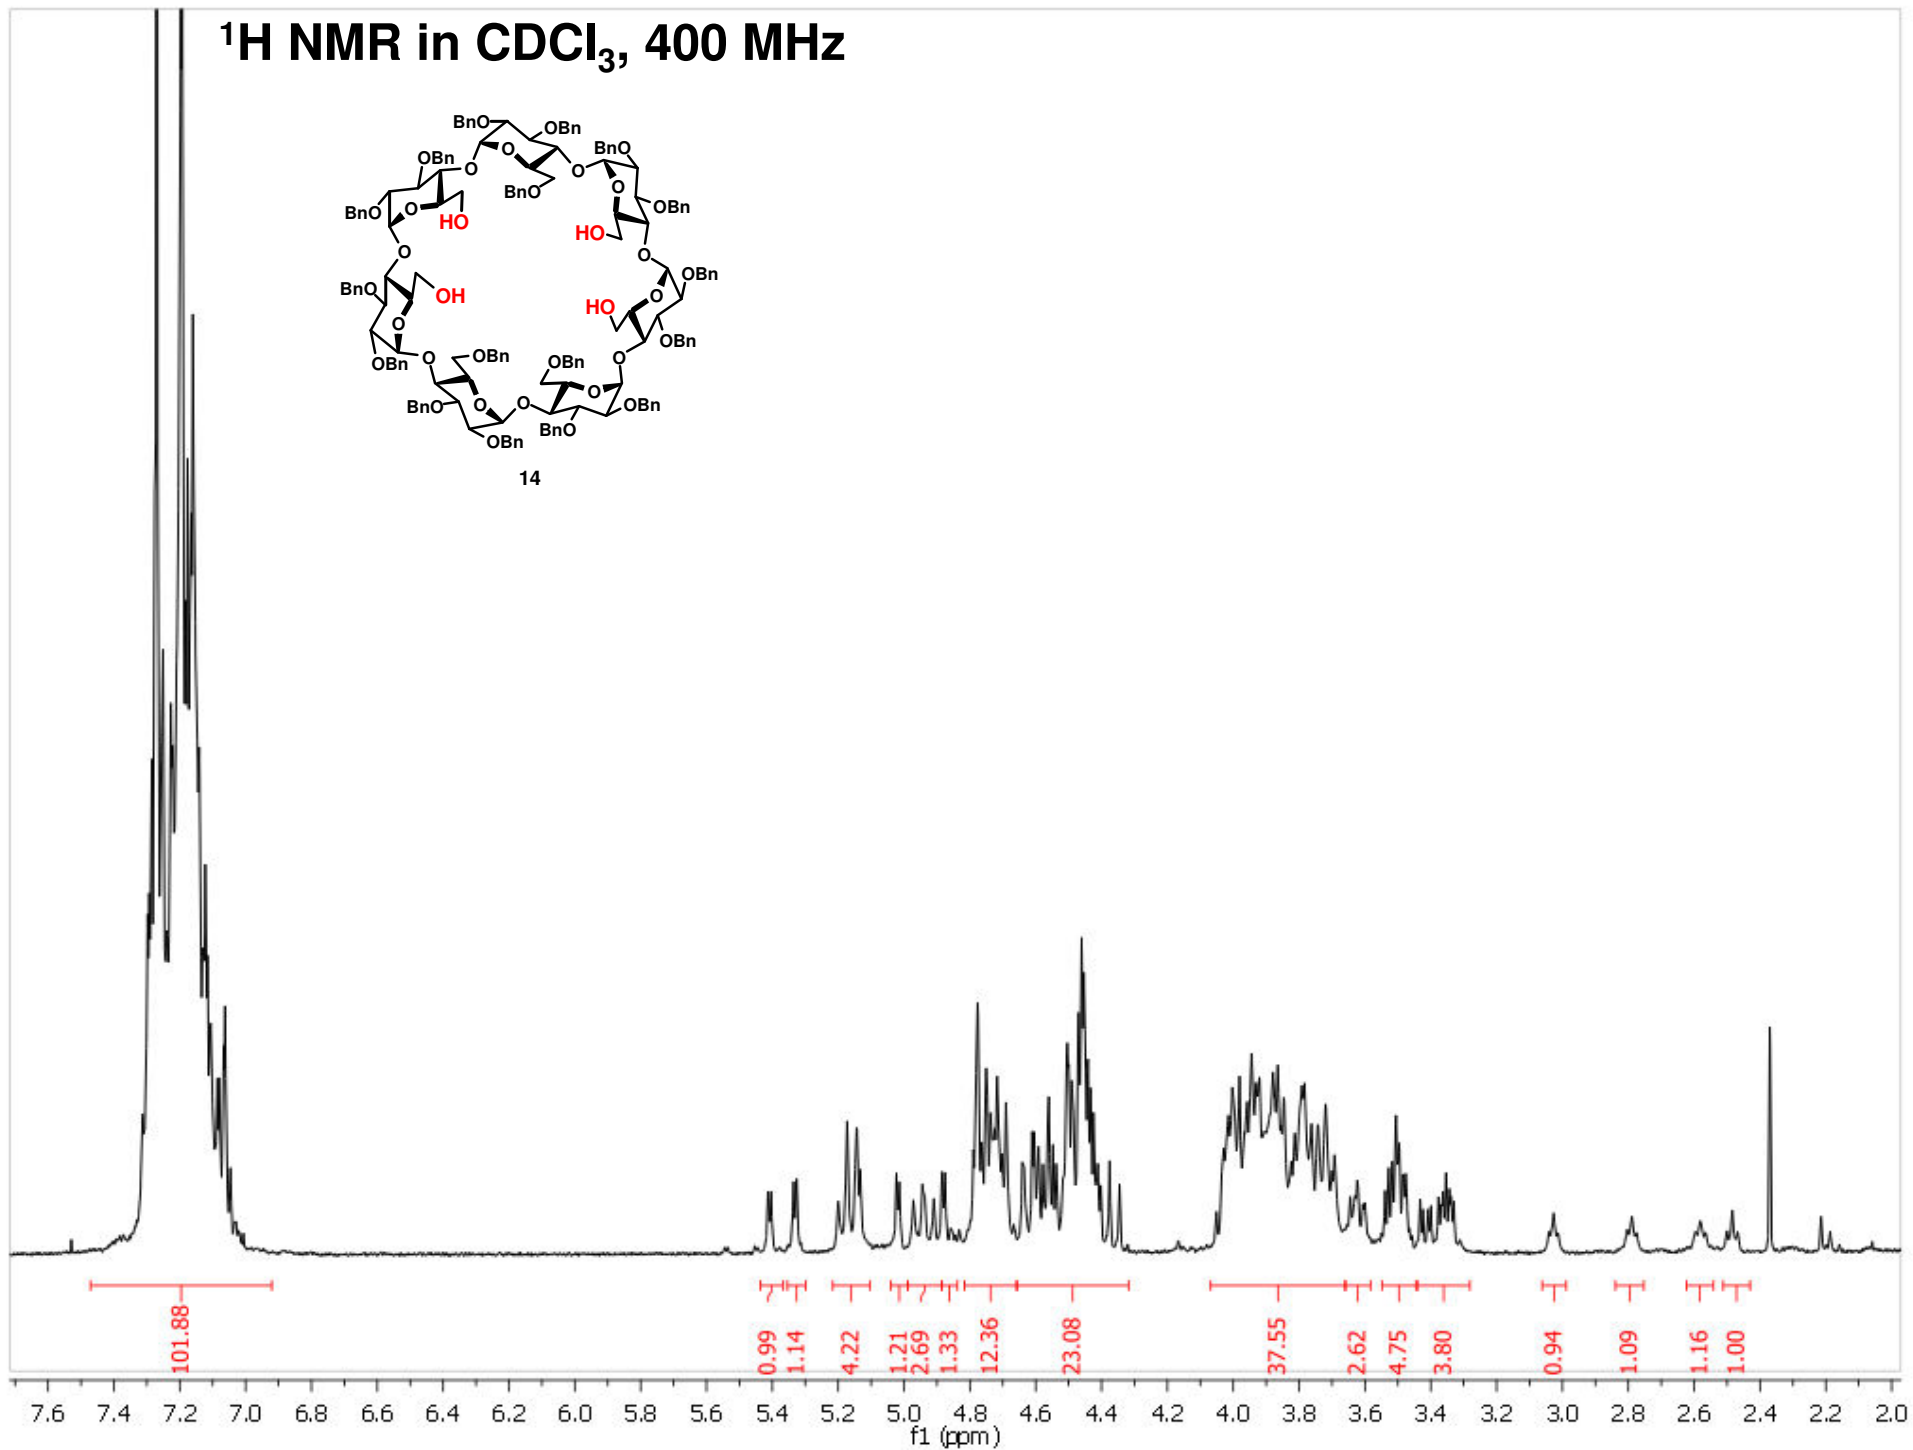

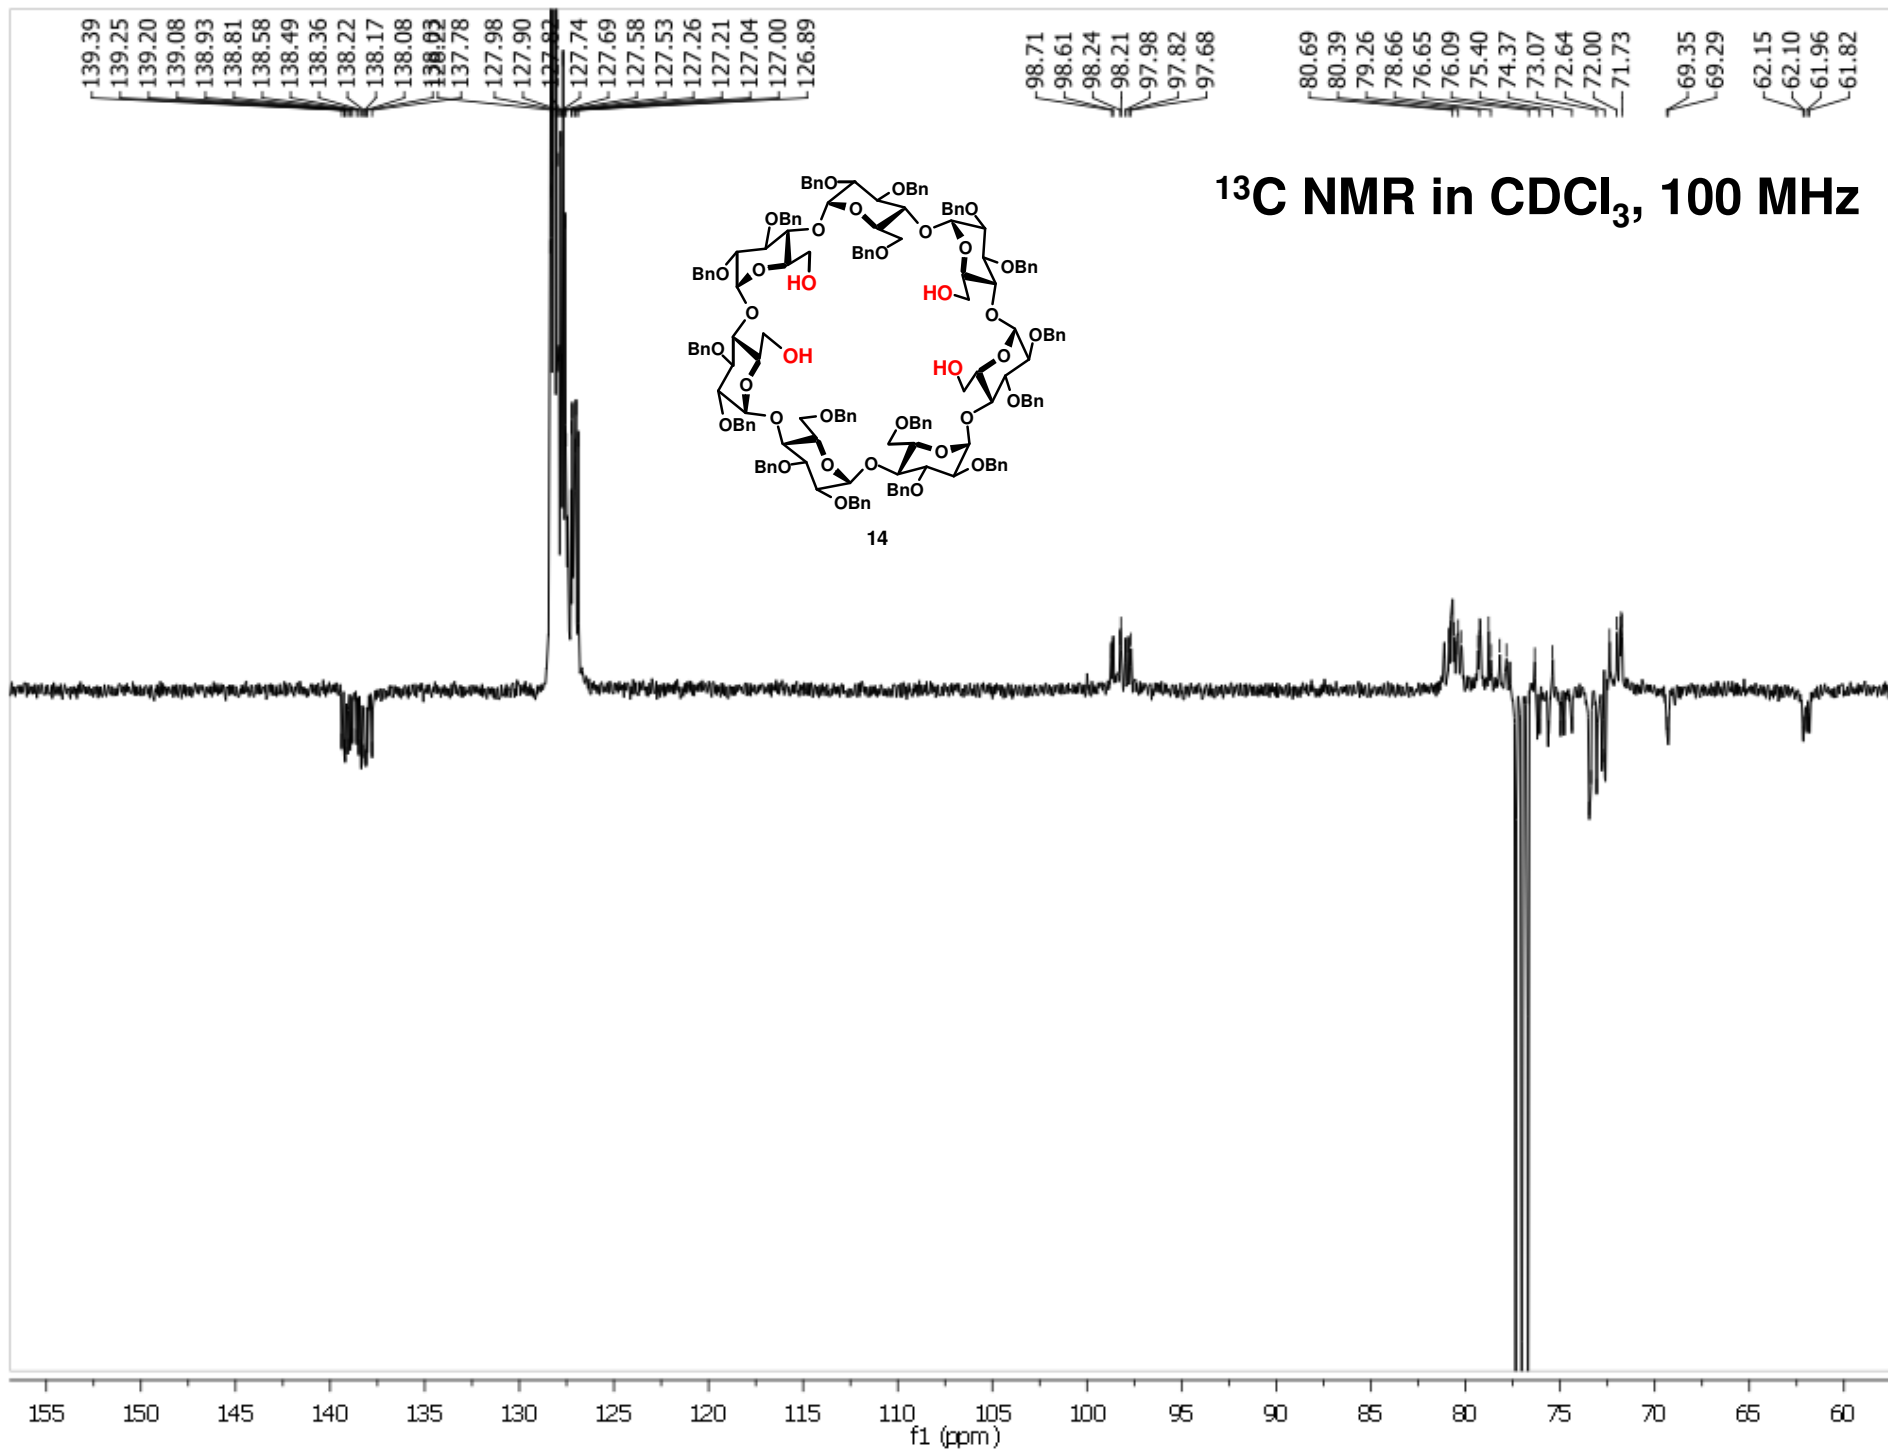

# $^1\text{H}$ - $^1\text{H}$ COSY NMR in $\text{CDCl}_3$ , 400 MHz

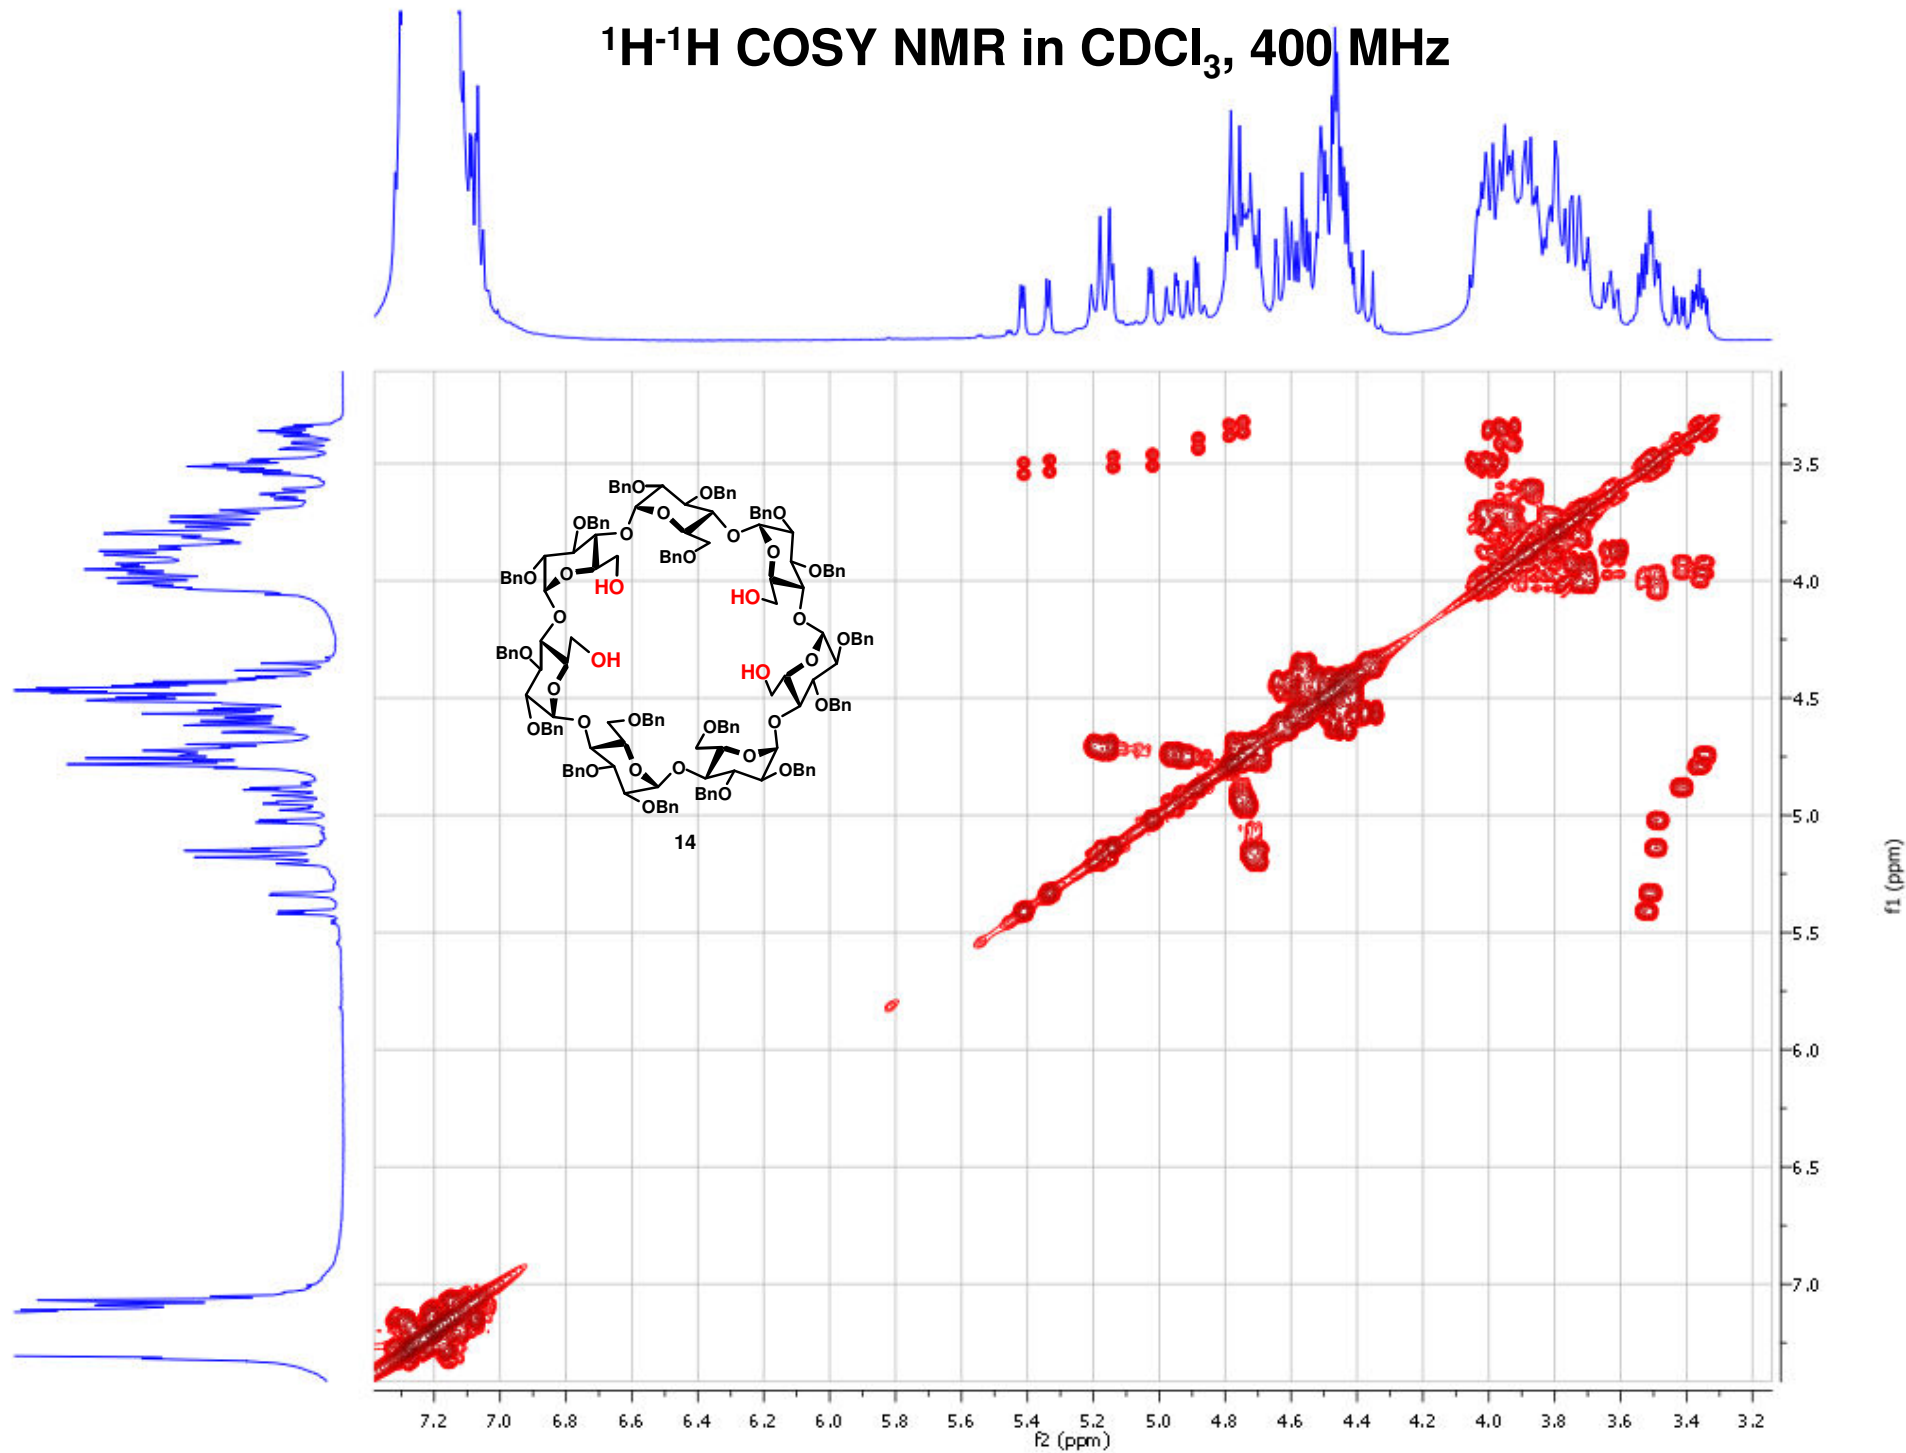

# $^1\text{H}$ - $^{13}\text{C}$ HSQC NMR in $\text{CDCl}_3$ , 400 MHz

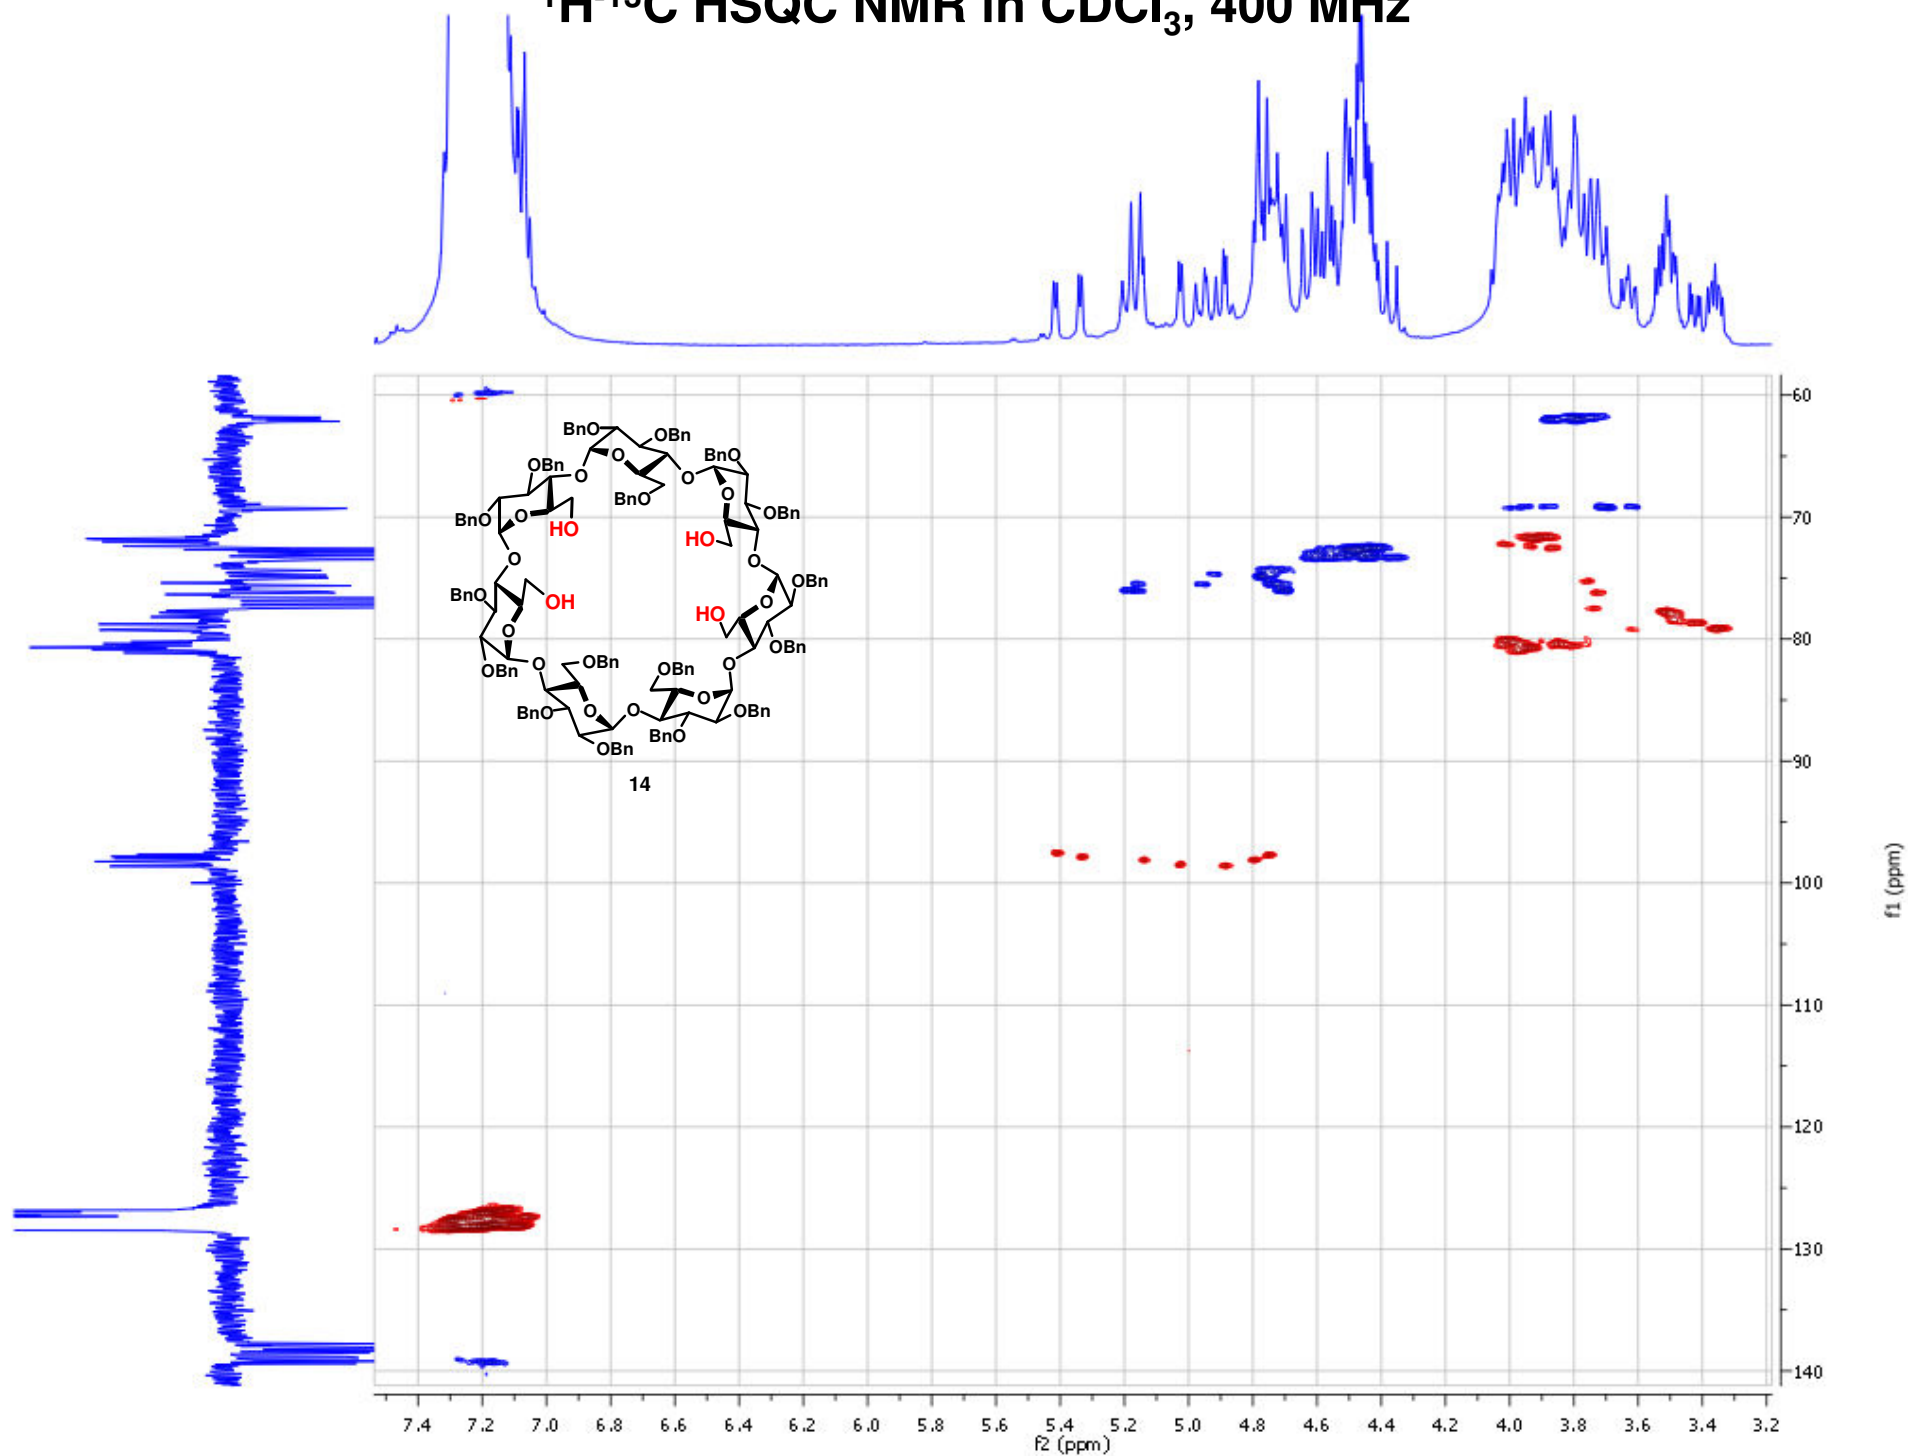

# $^1\text{H}$ NMR in $\text{CDCl}_3$ , 400 MHz

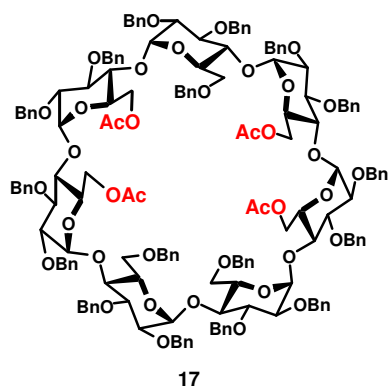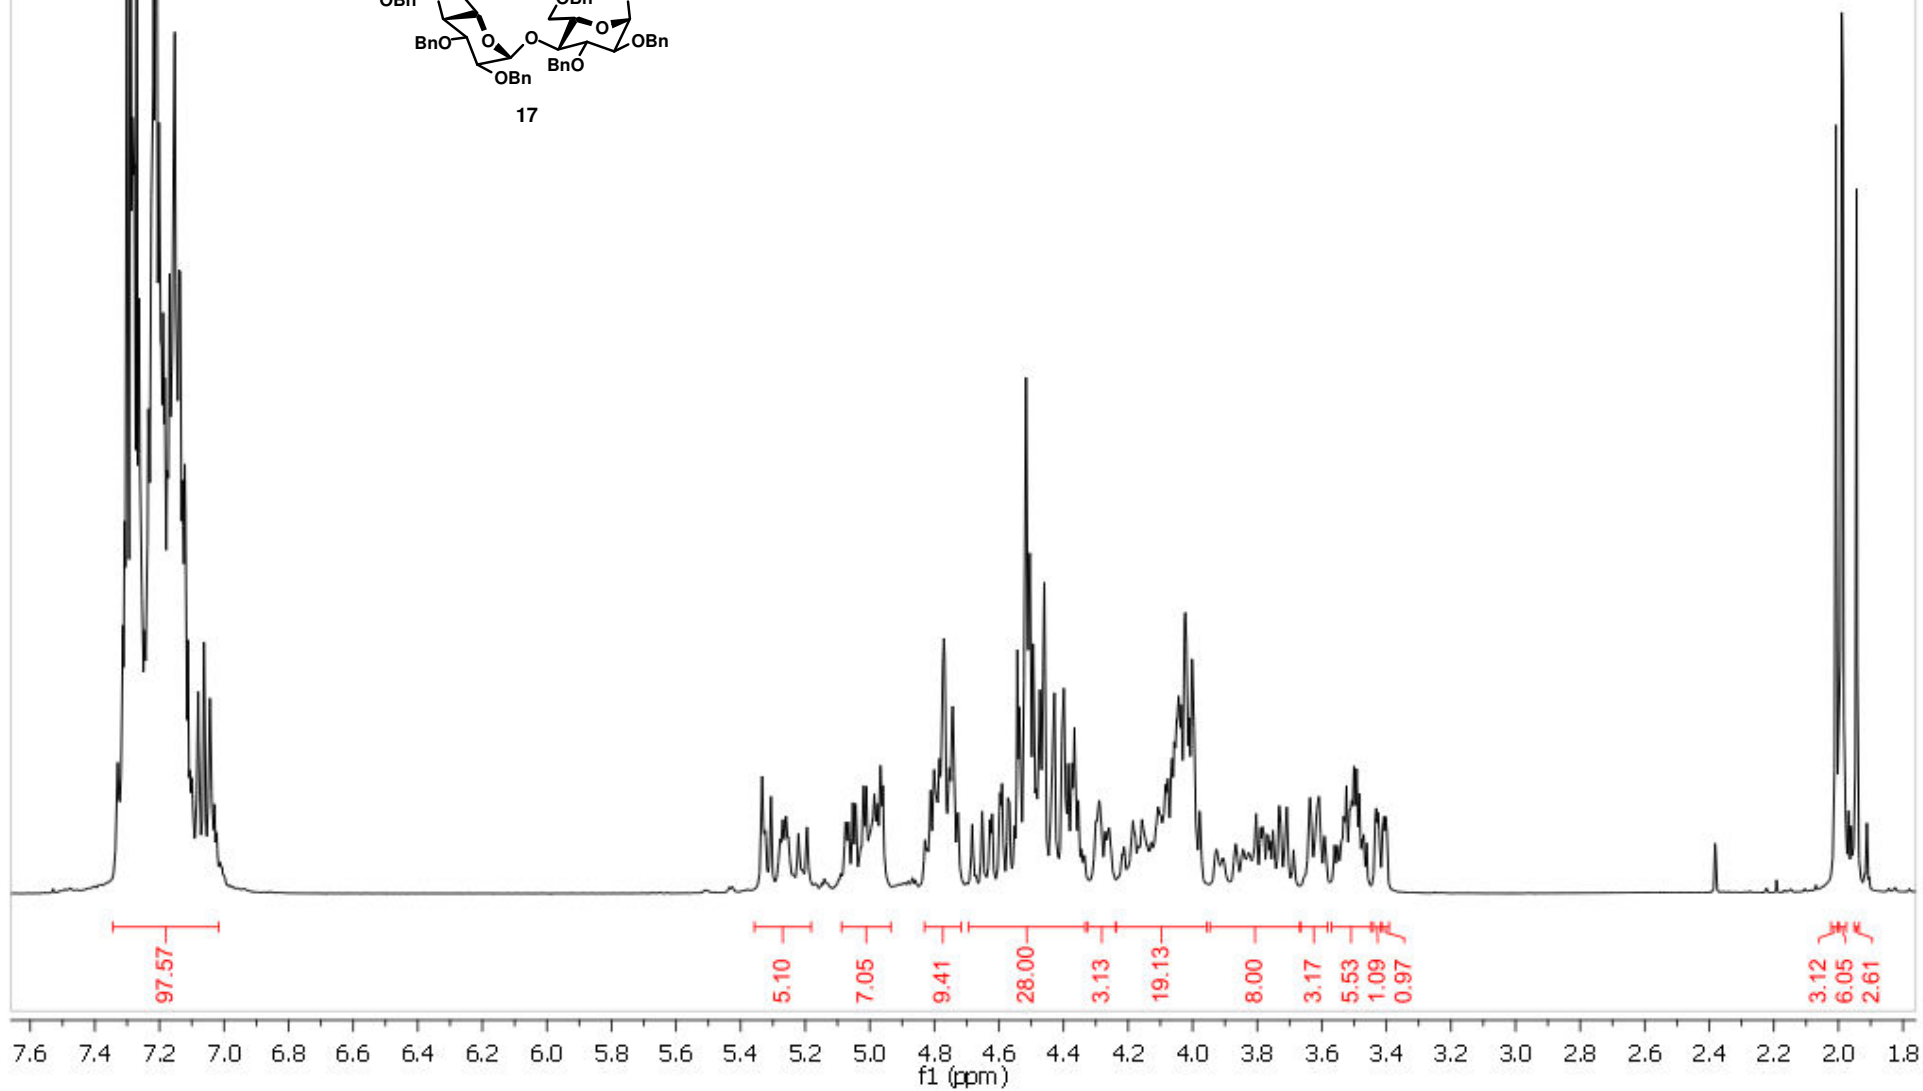

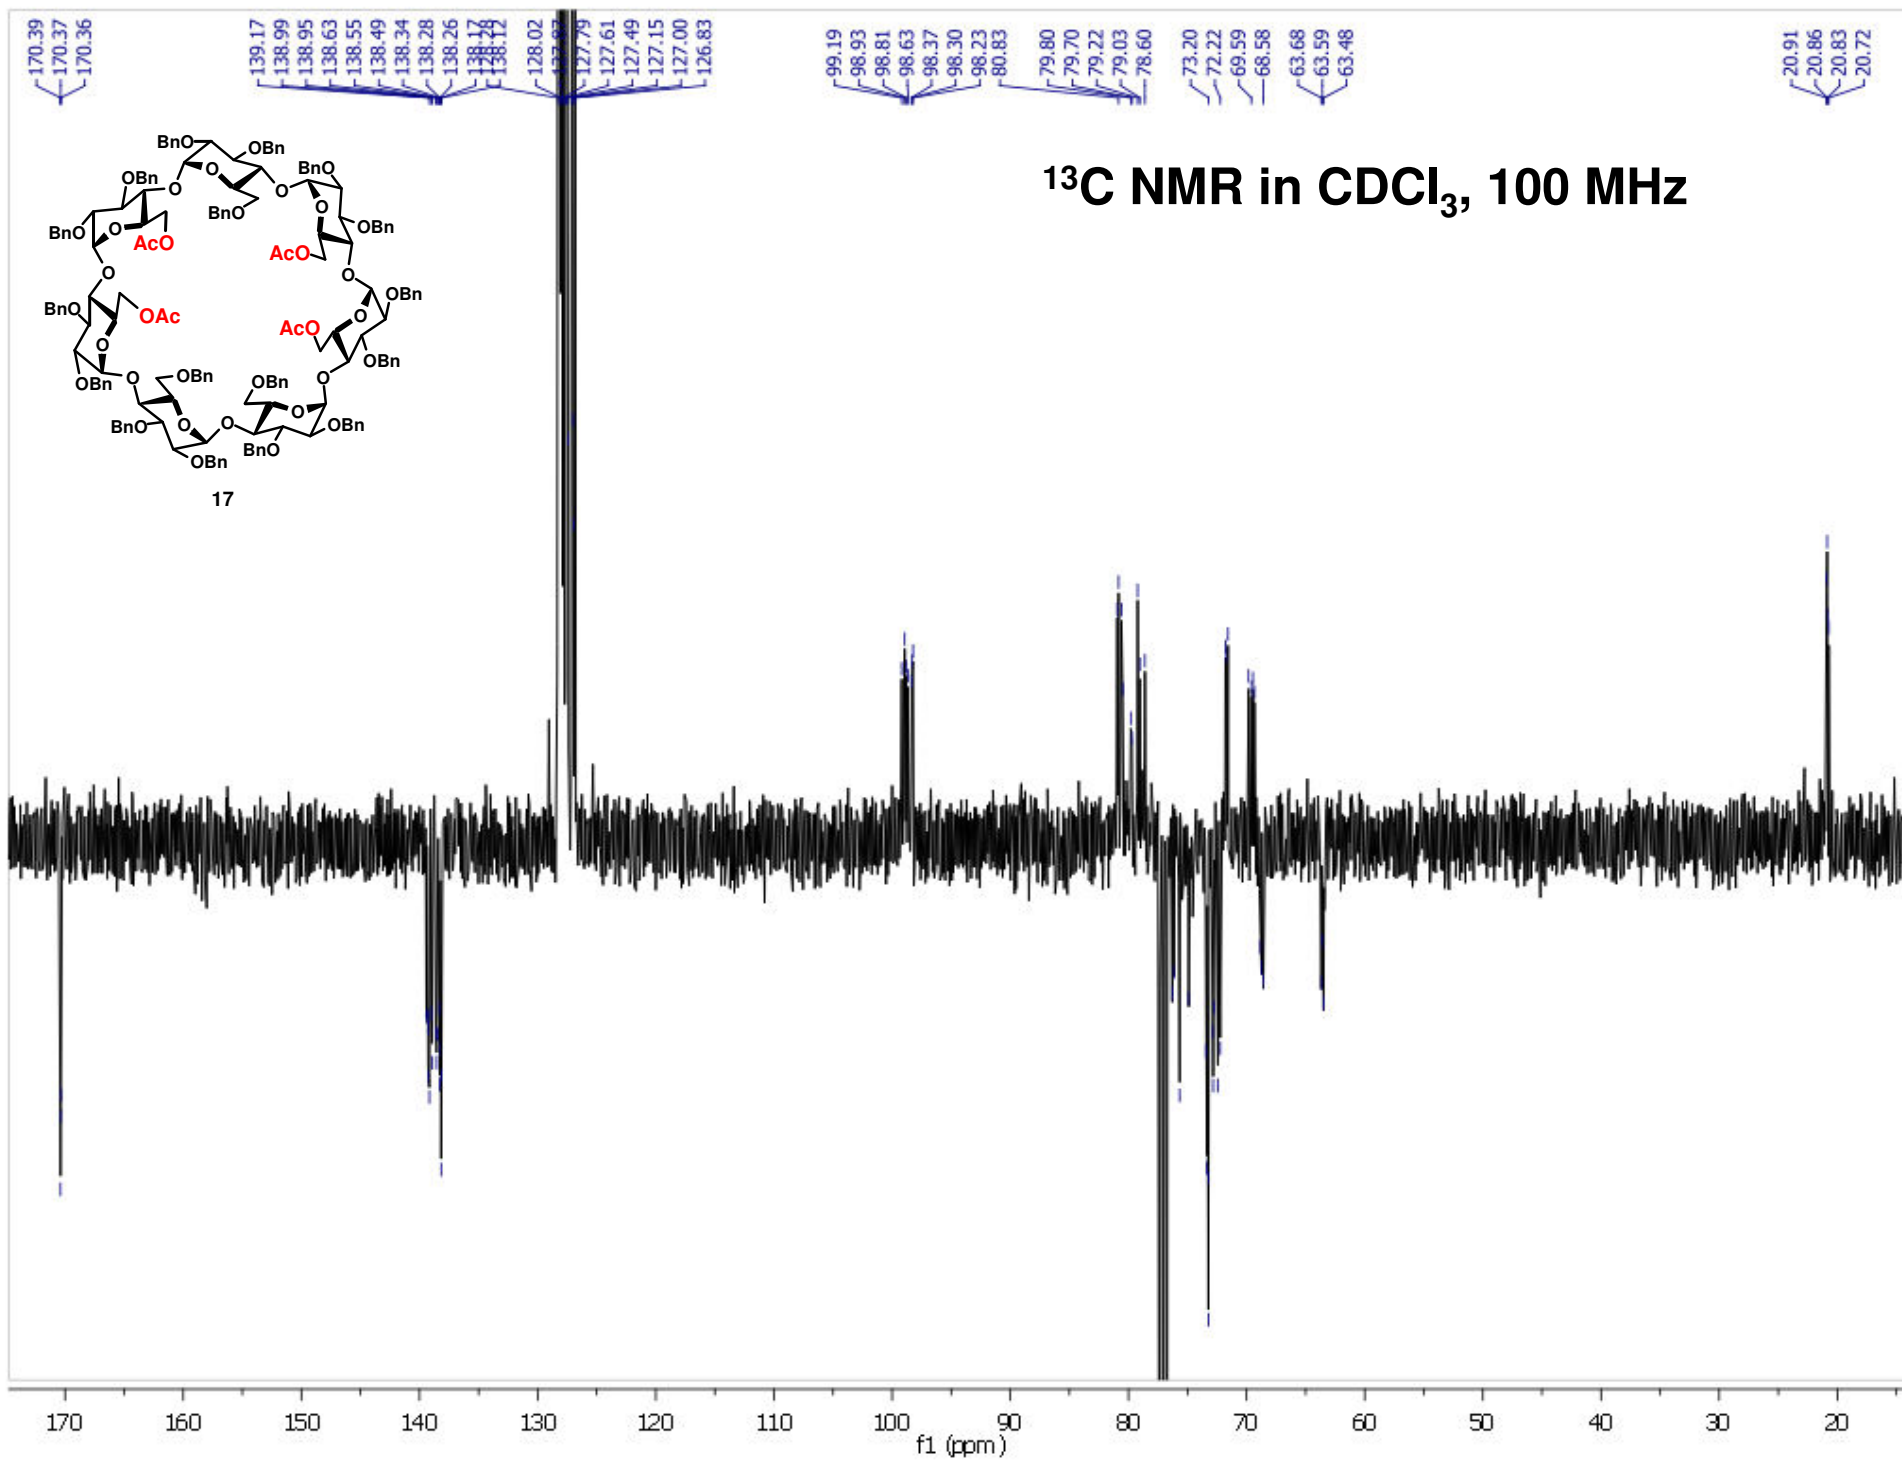

# $^1\text{H}$ - $^1\text{H}$ COSY NMR in $\text{CDCl}_3$ , 400 MHz

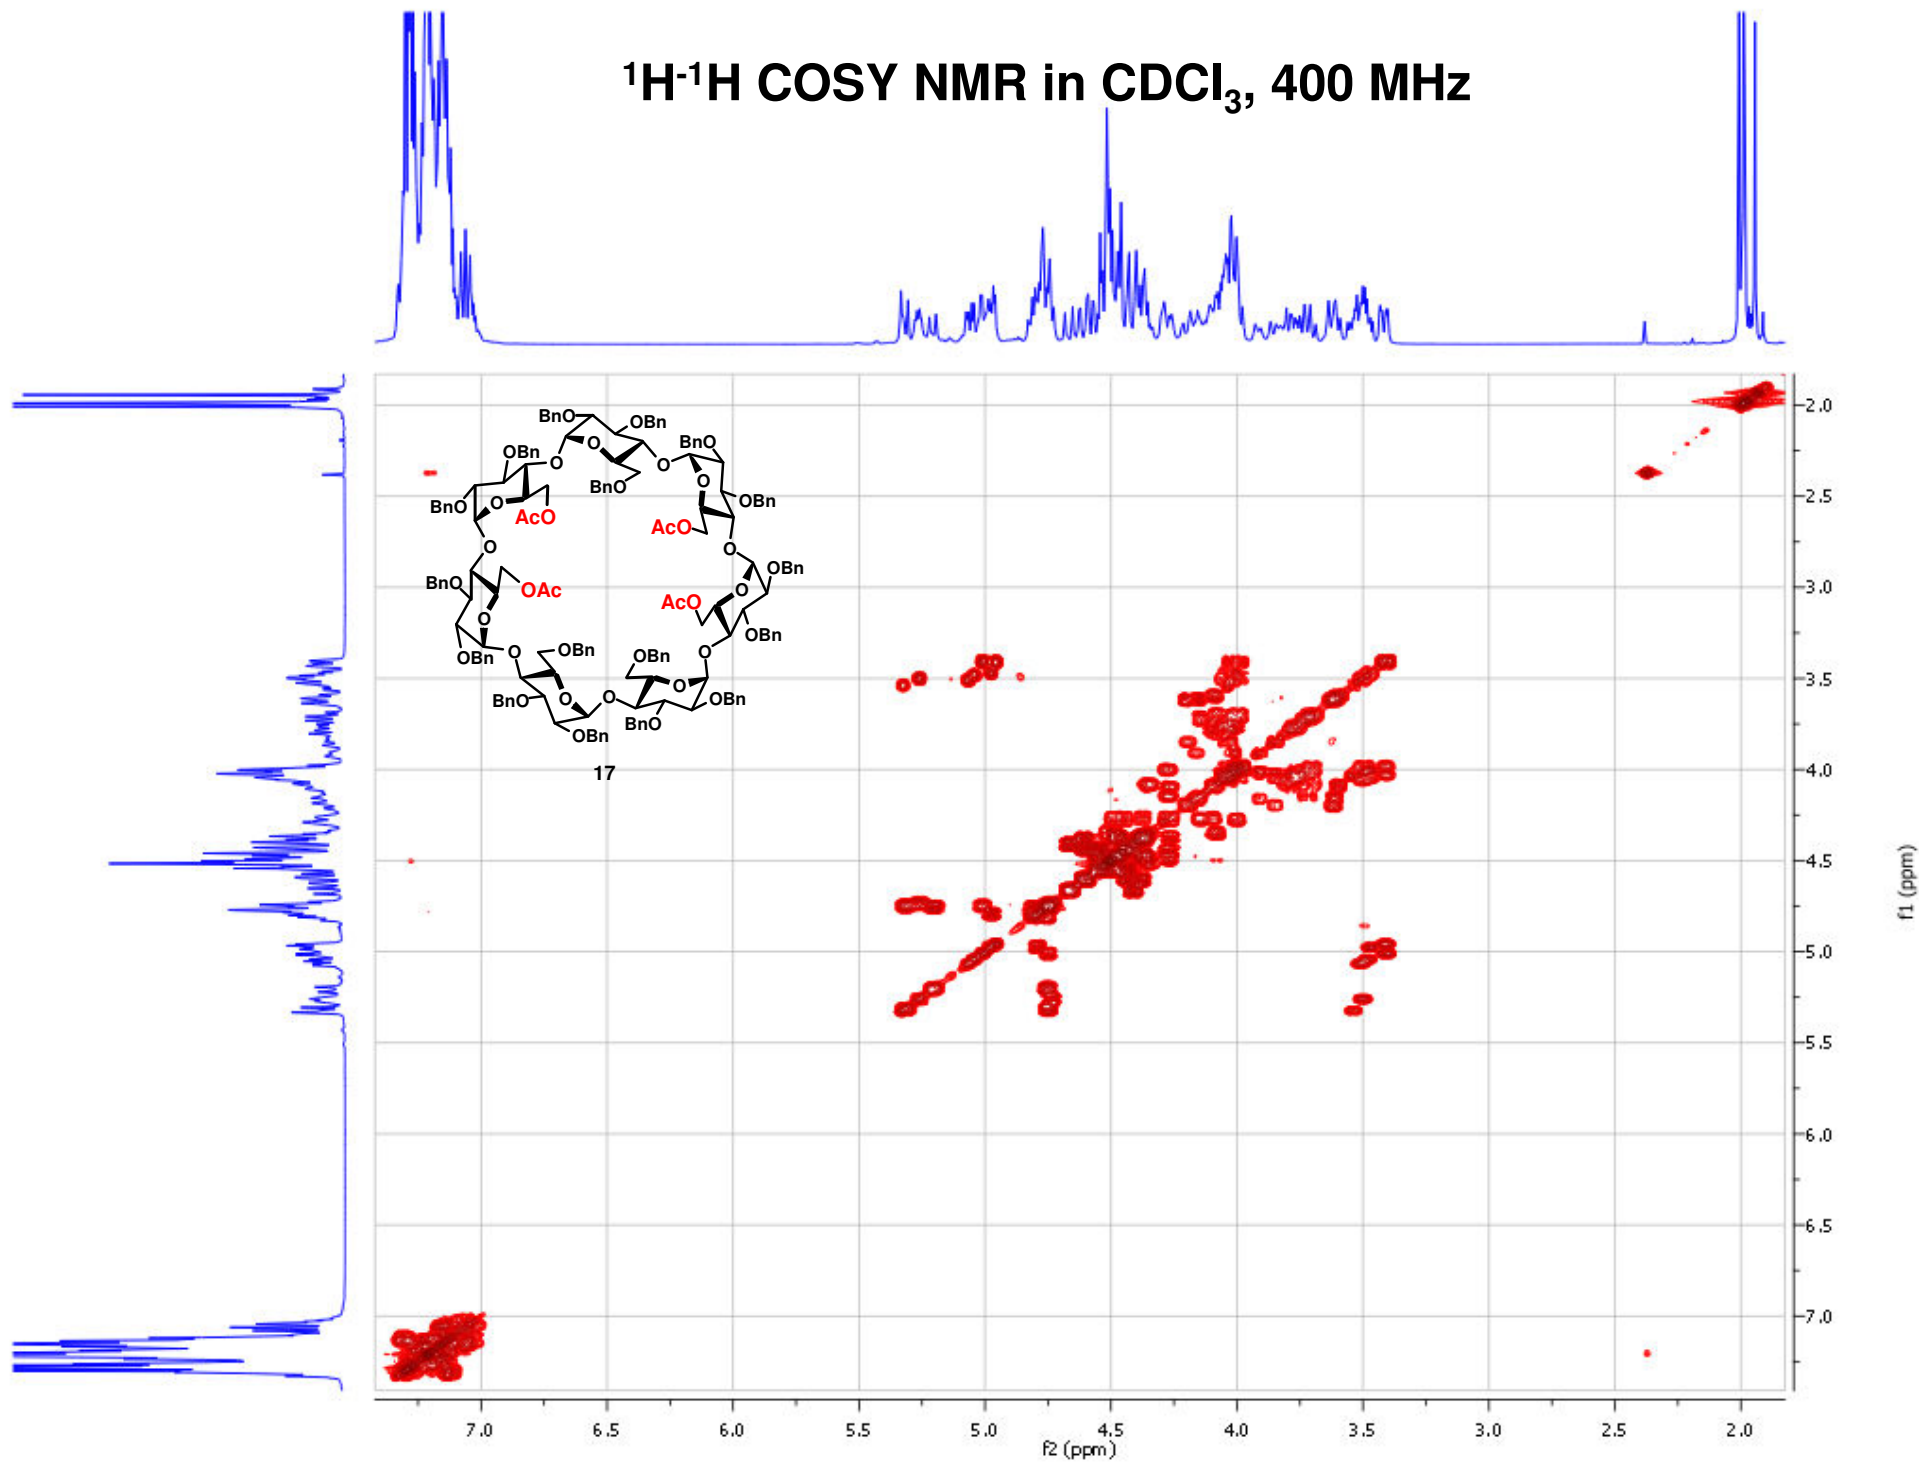



# $^1\text{H}$ - $^{13}\text{C}$ HSQC NMR in $\text{CDCl}_3$ , 400 MHz

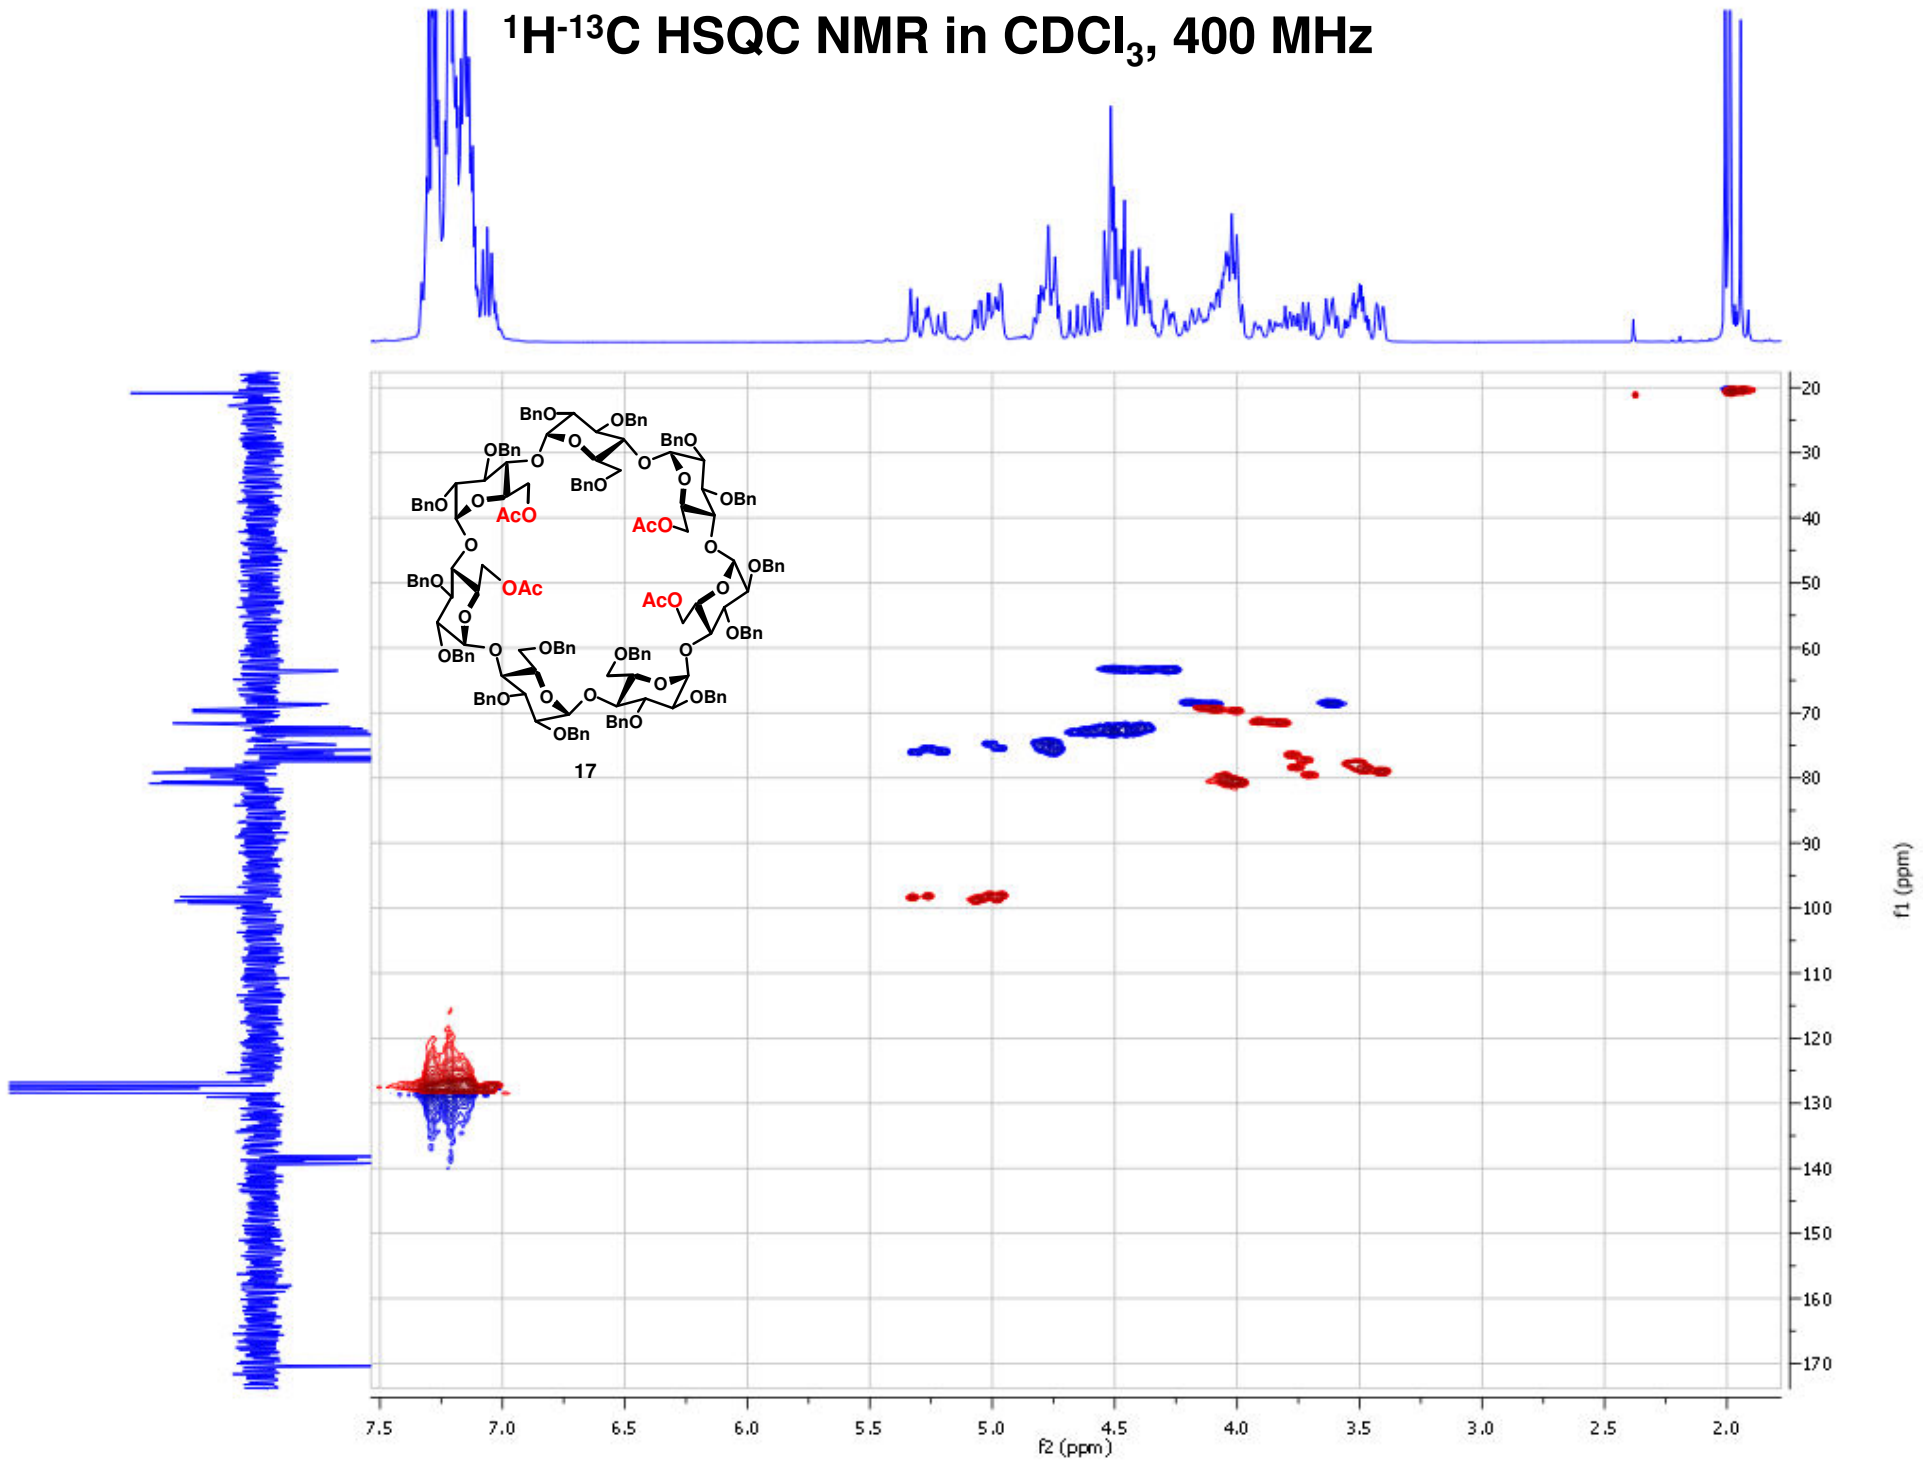

# <sup>1</sup>H NMR in CD<sub>3</sub>OD, 400 MHz

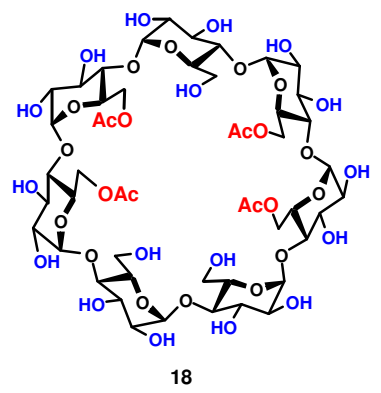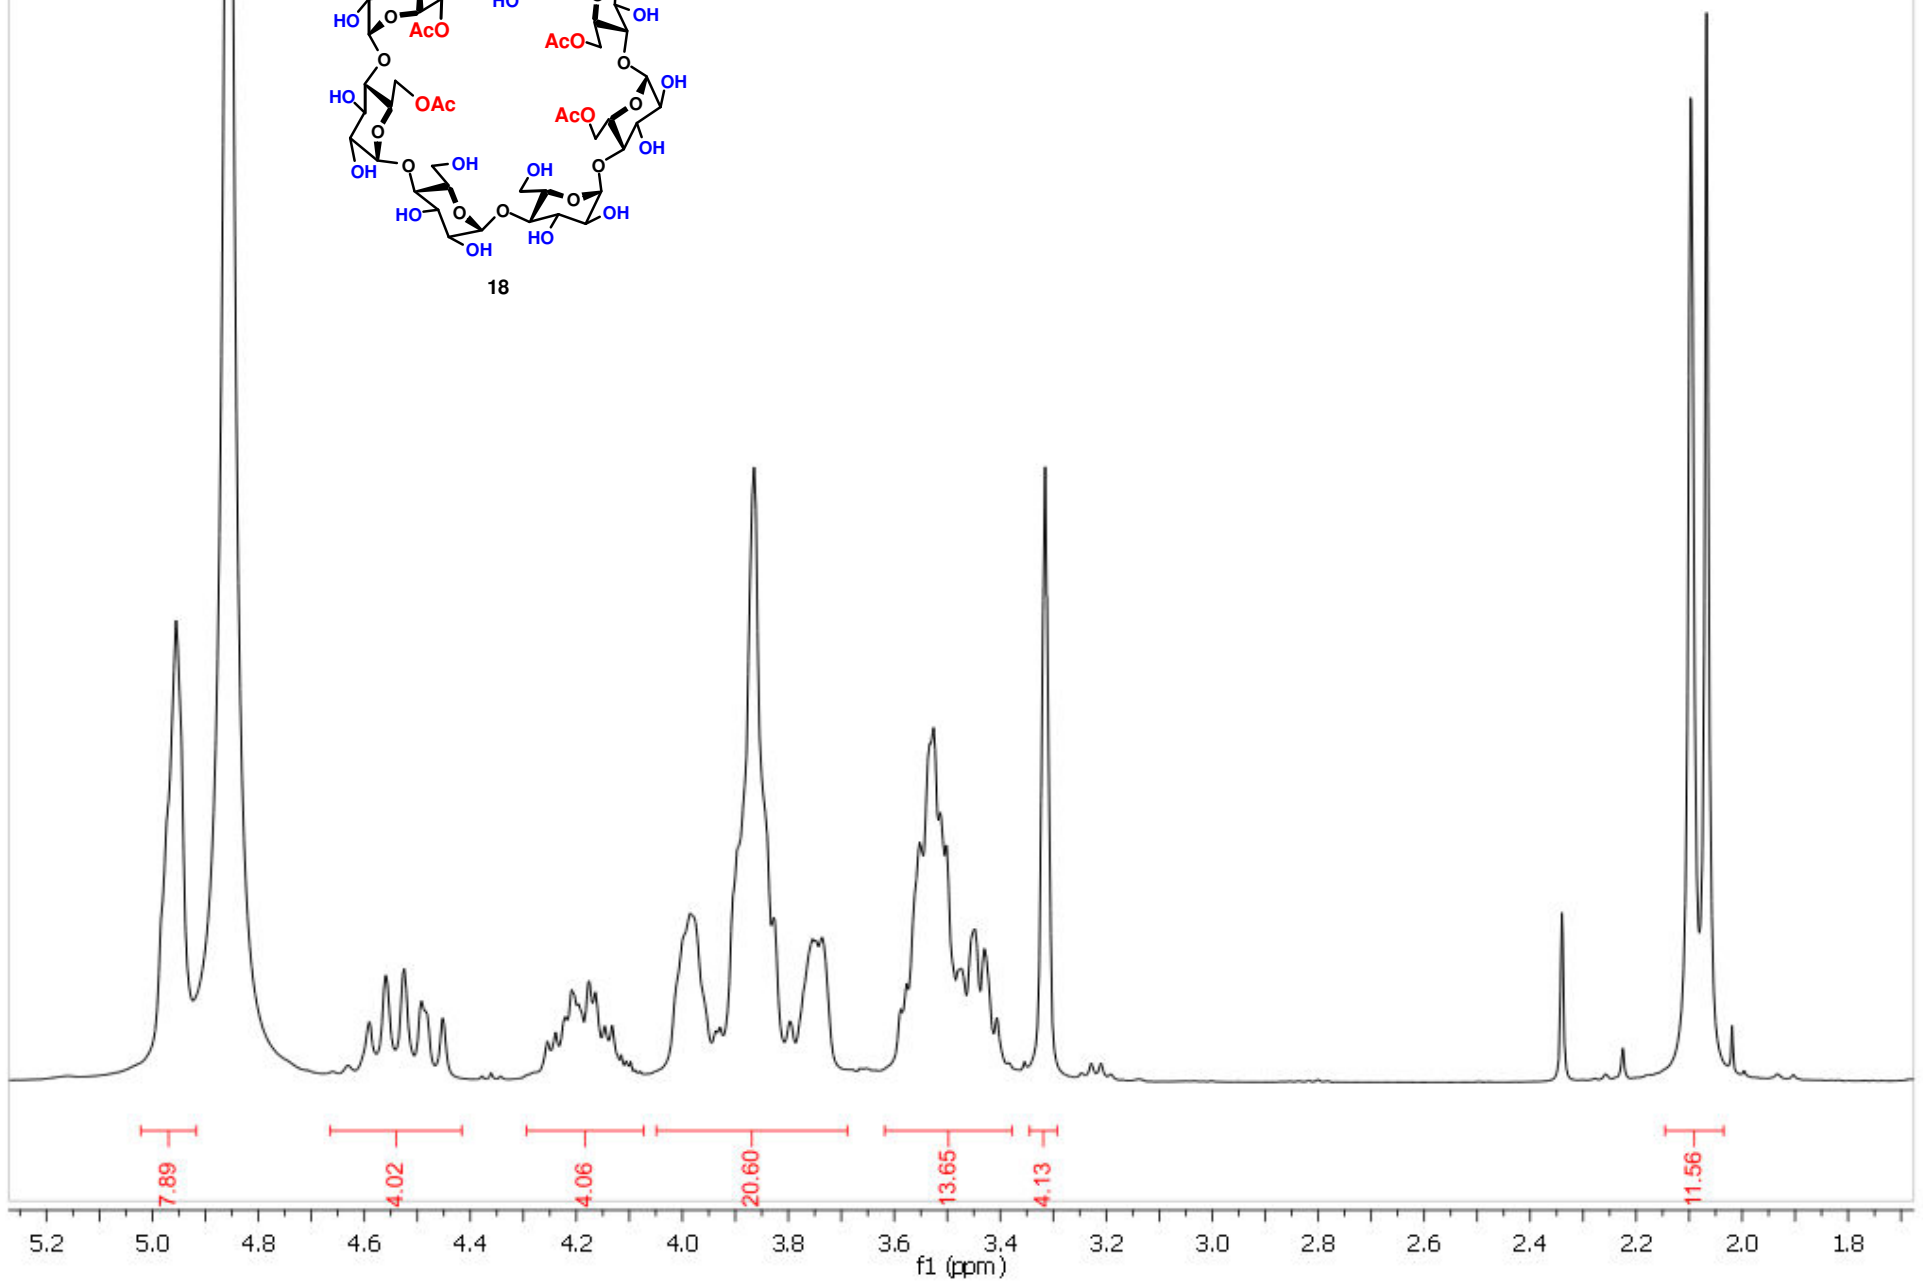

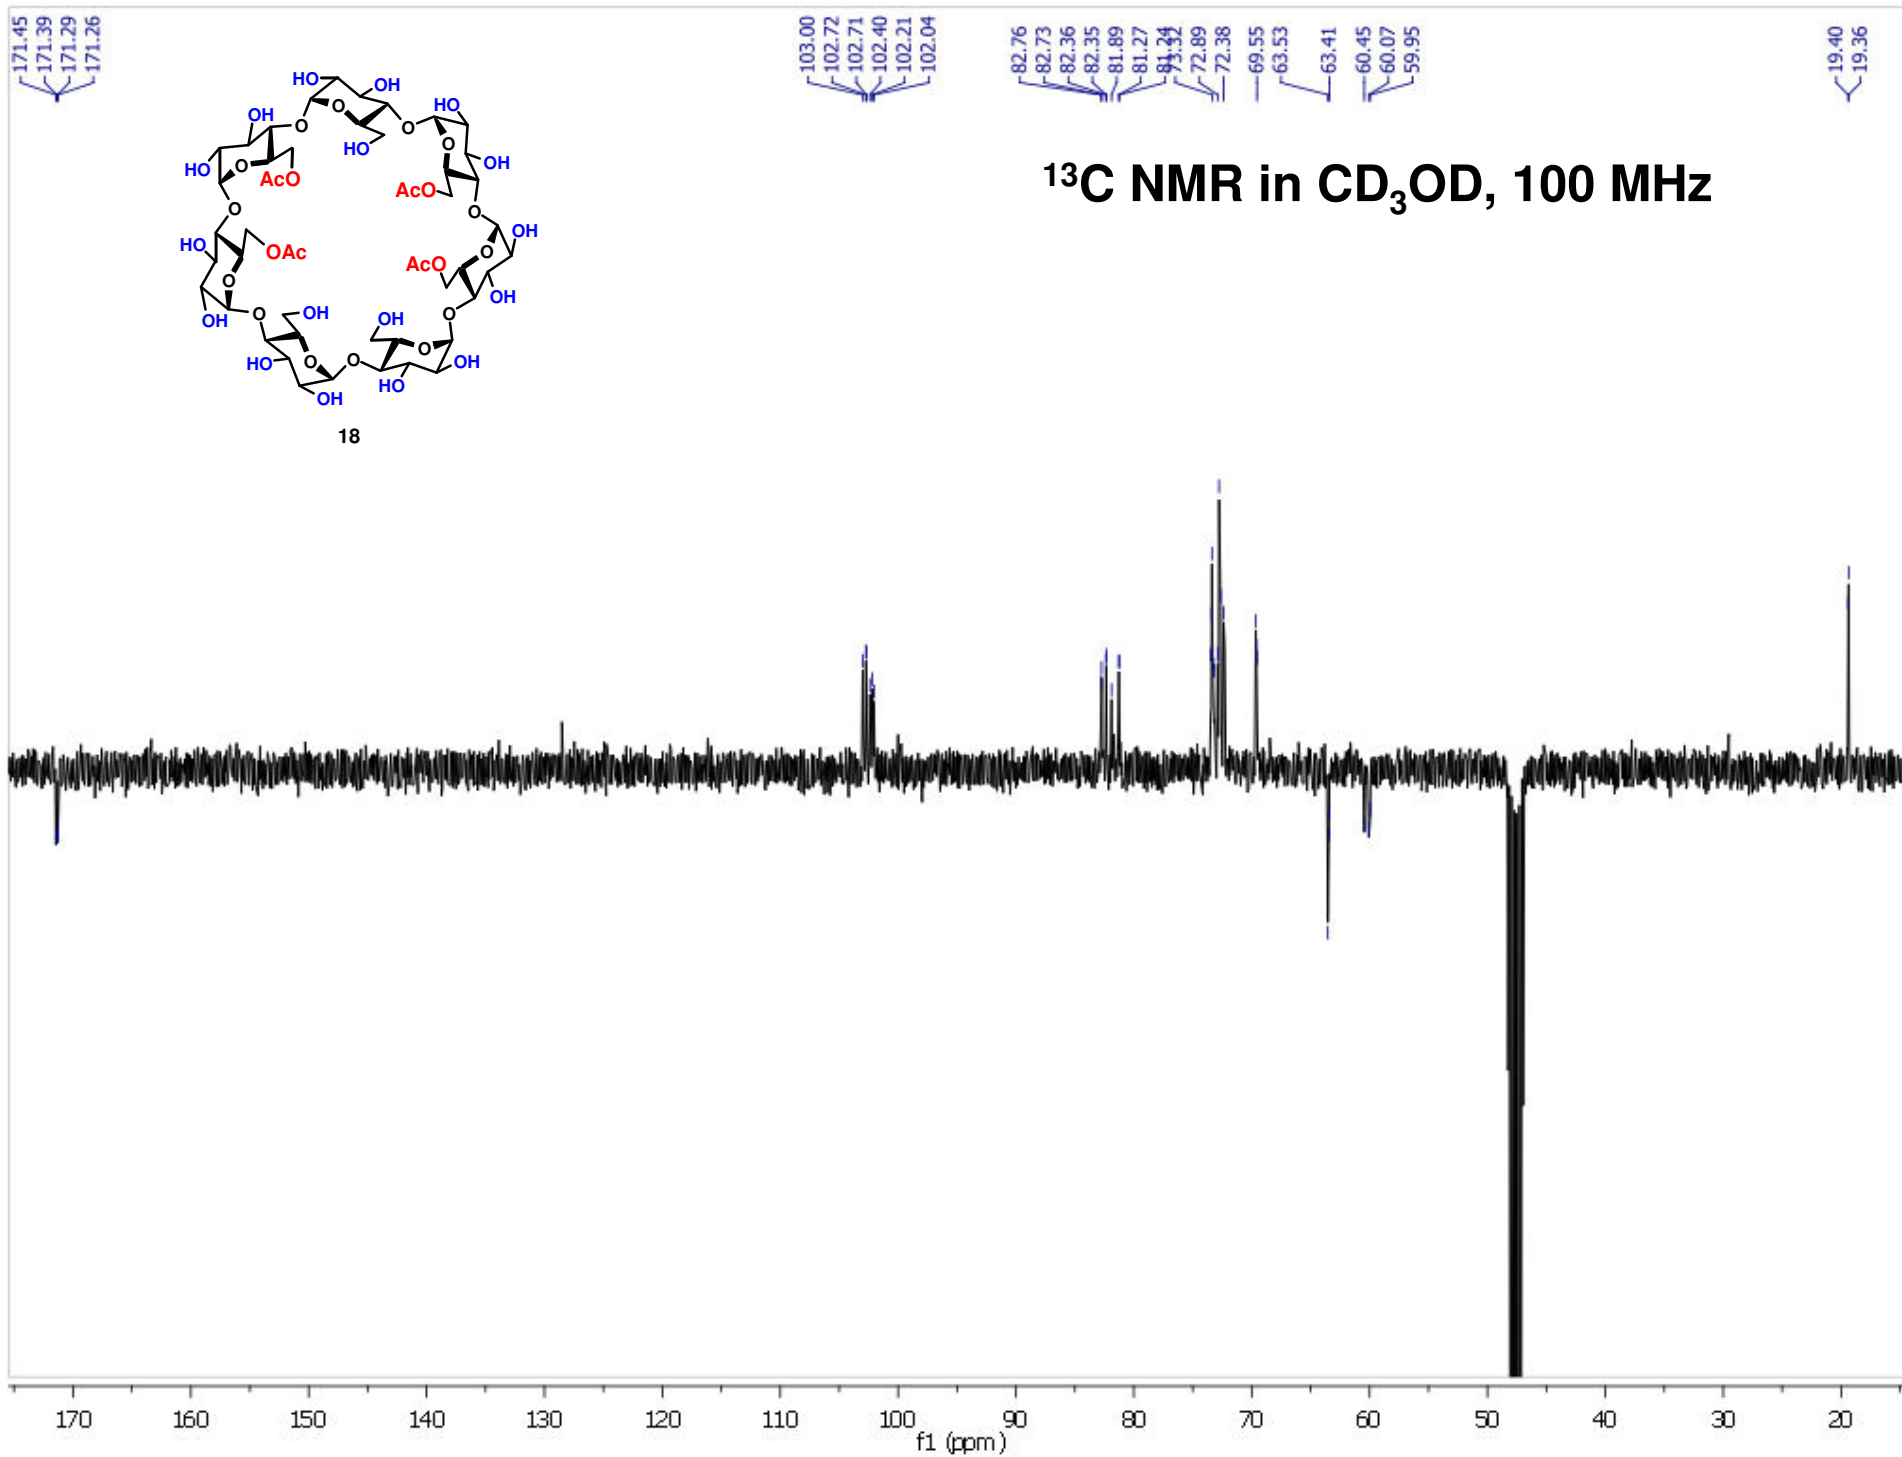

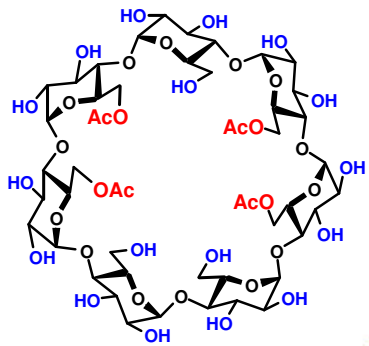

18

# $^1\text{H}$ - $^1\text{H}$ COSY NMR in $\text{CD}_3\text{OD}$ , 400 MHz

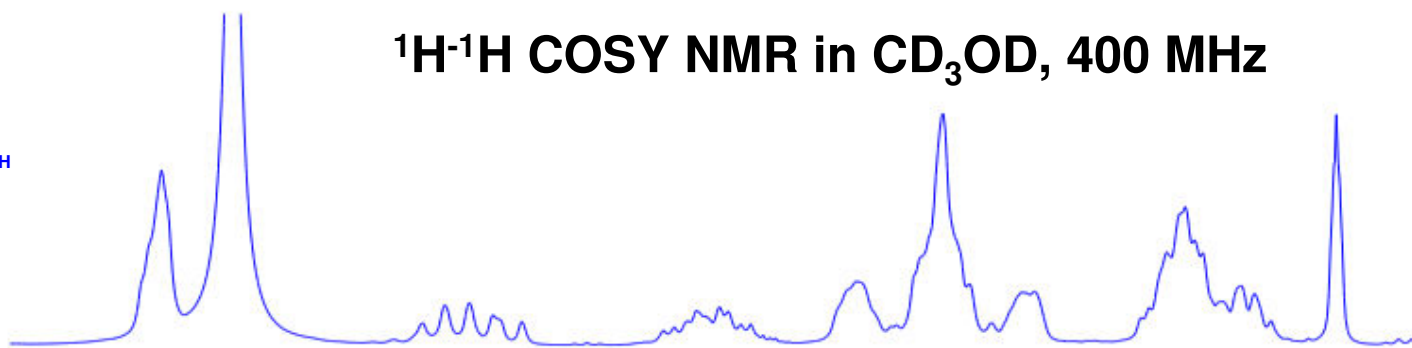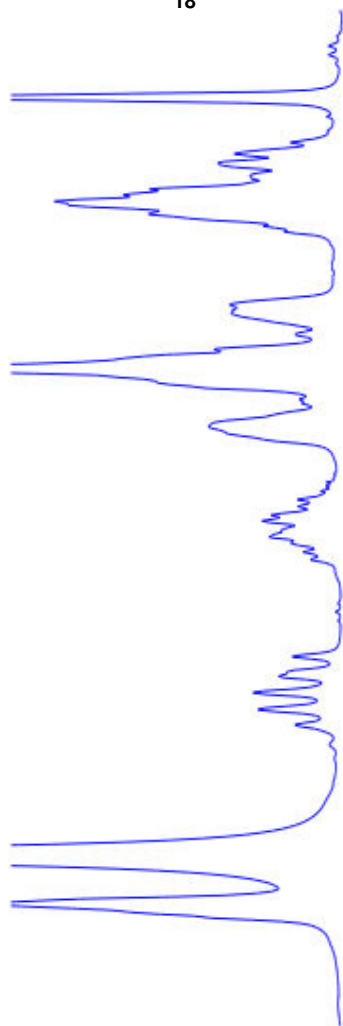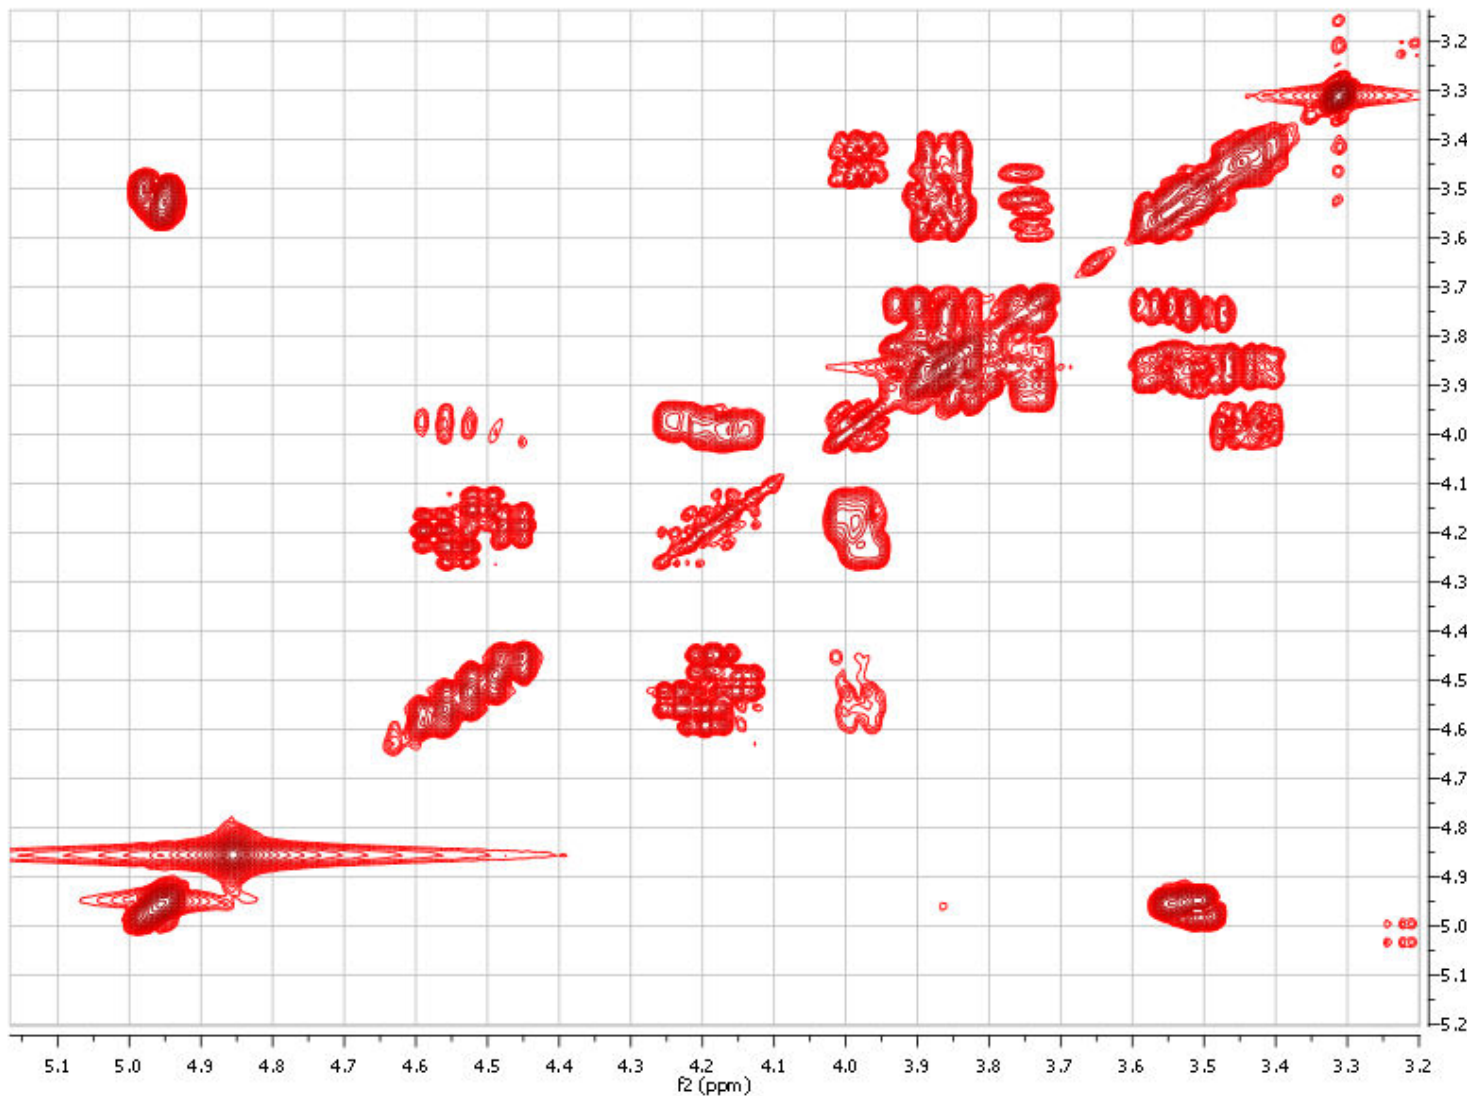

f1 (ppm)

# <sup>1</sup>H NMR in CDCl<sub>3</sub>, 400 MHz

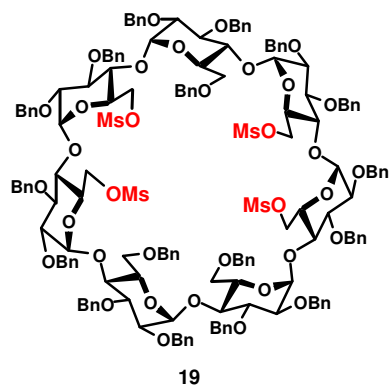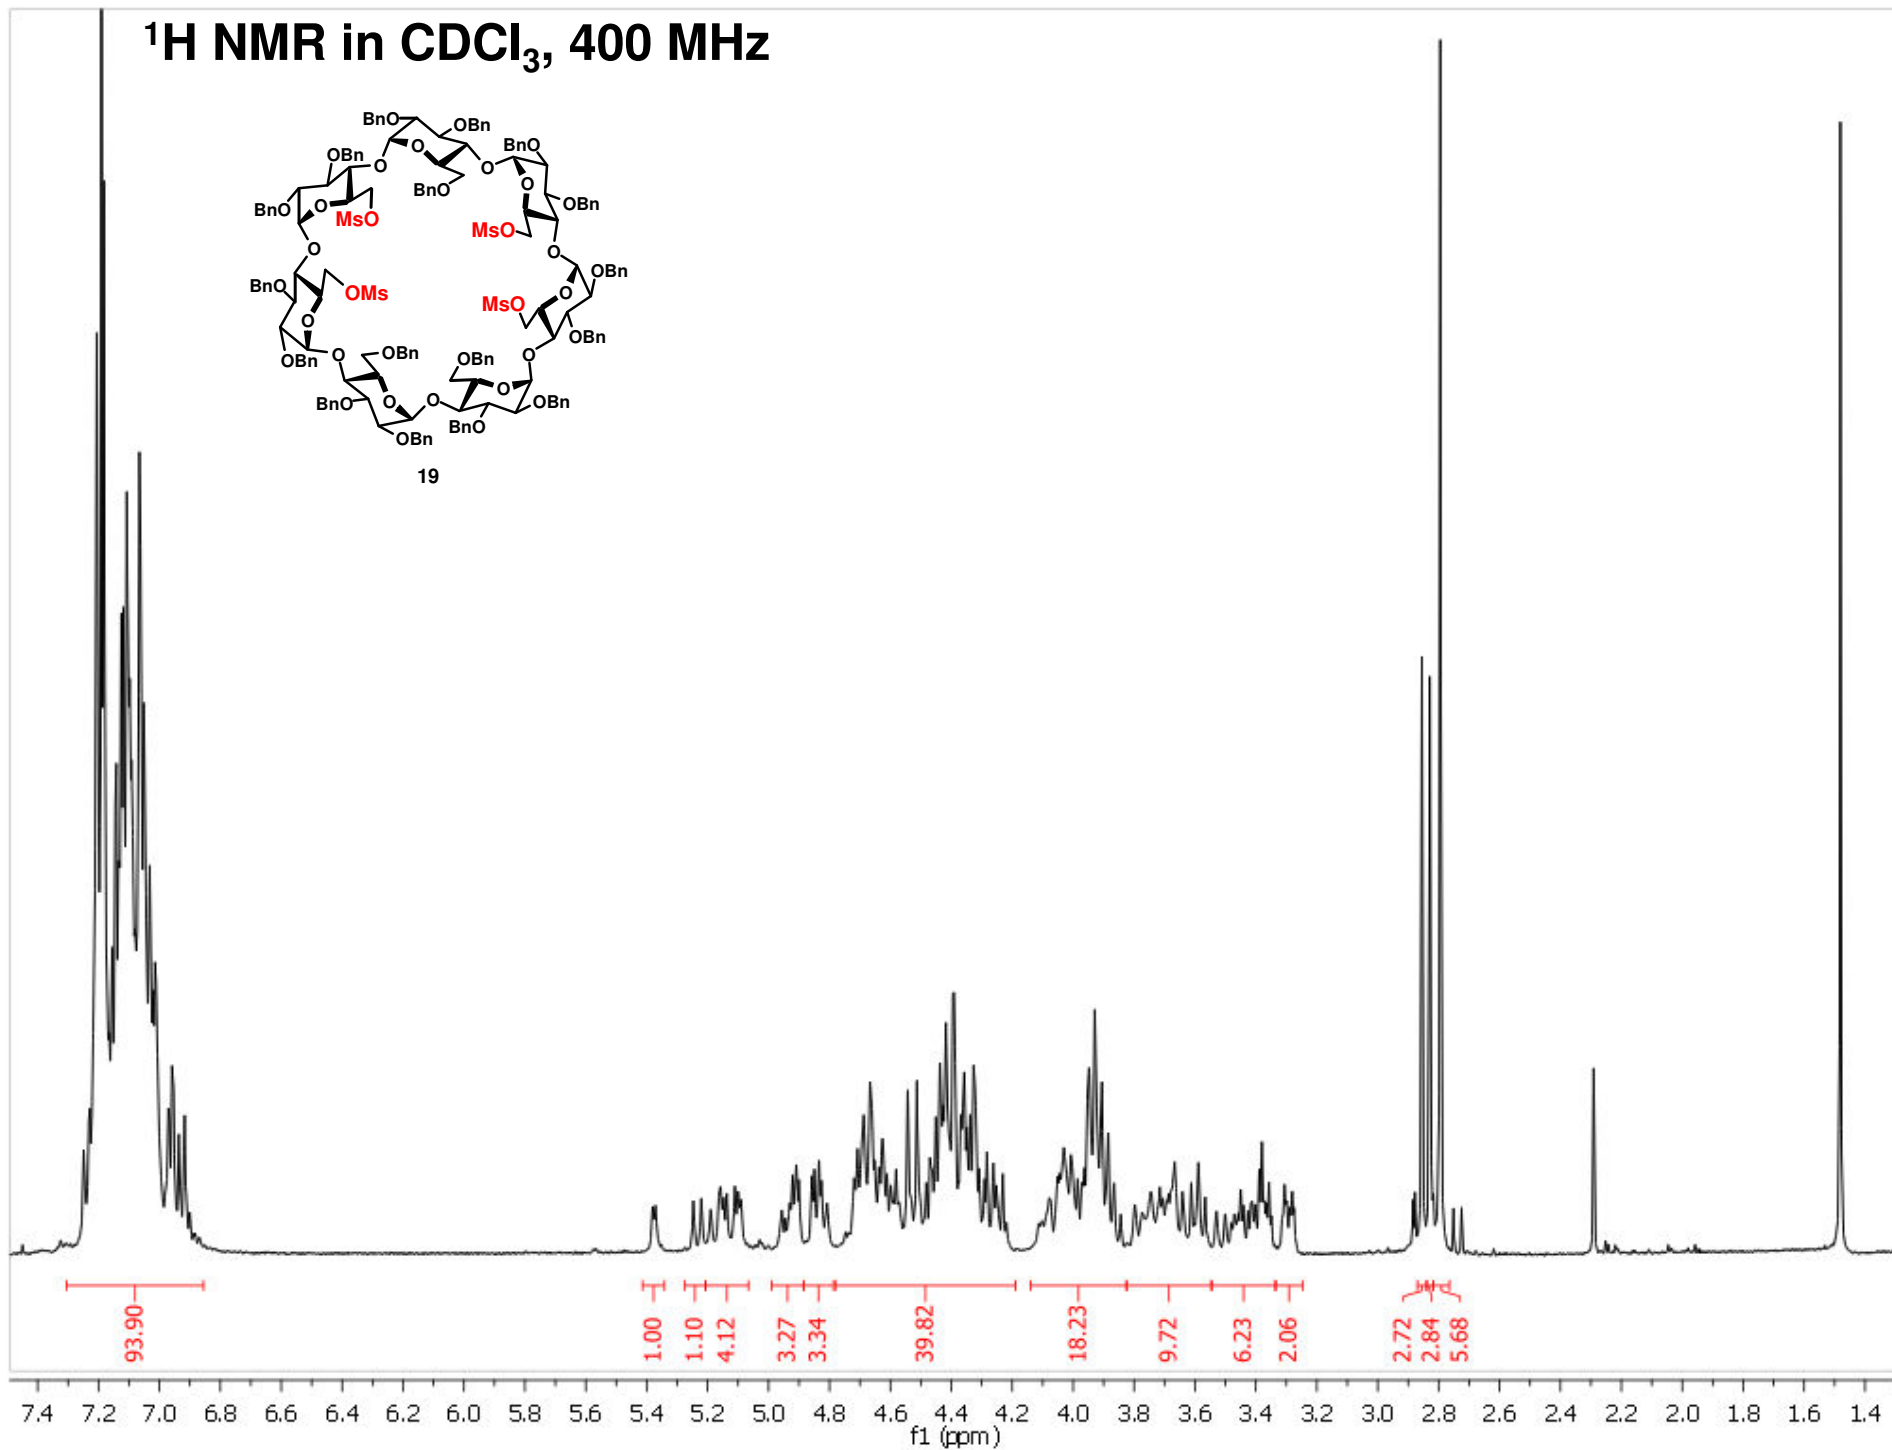

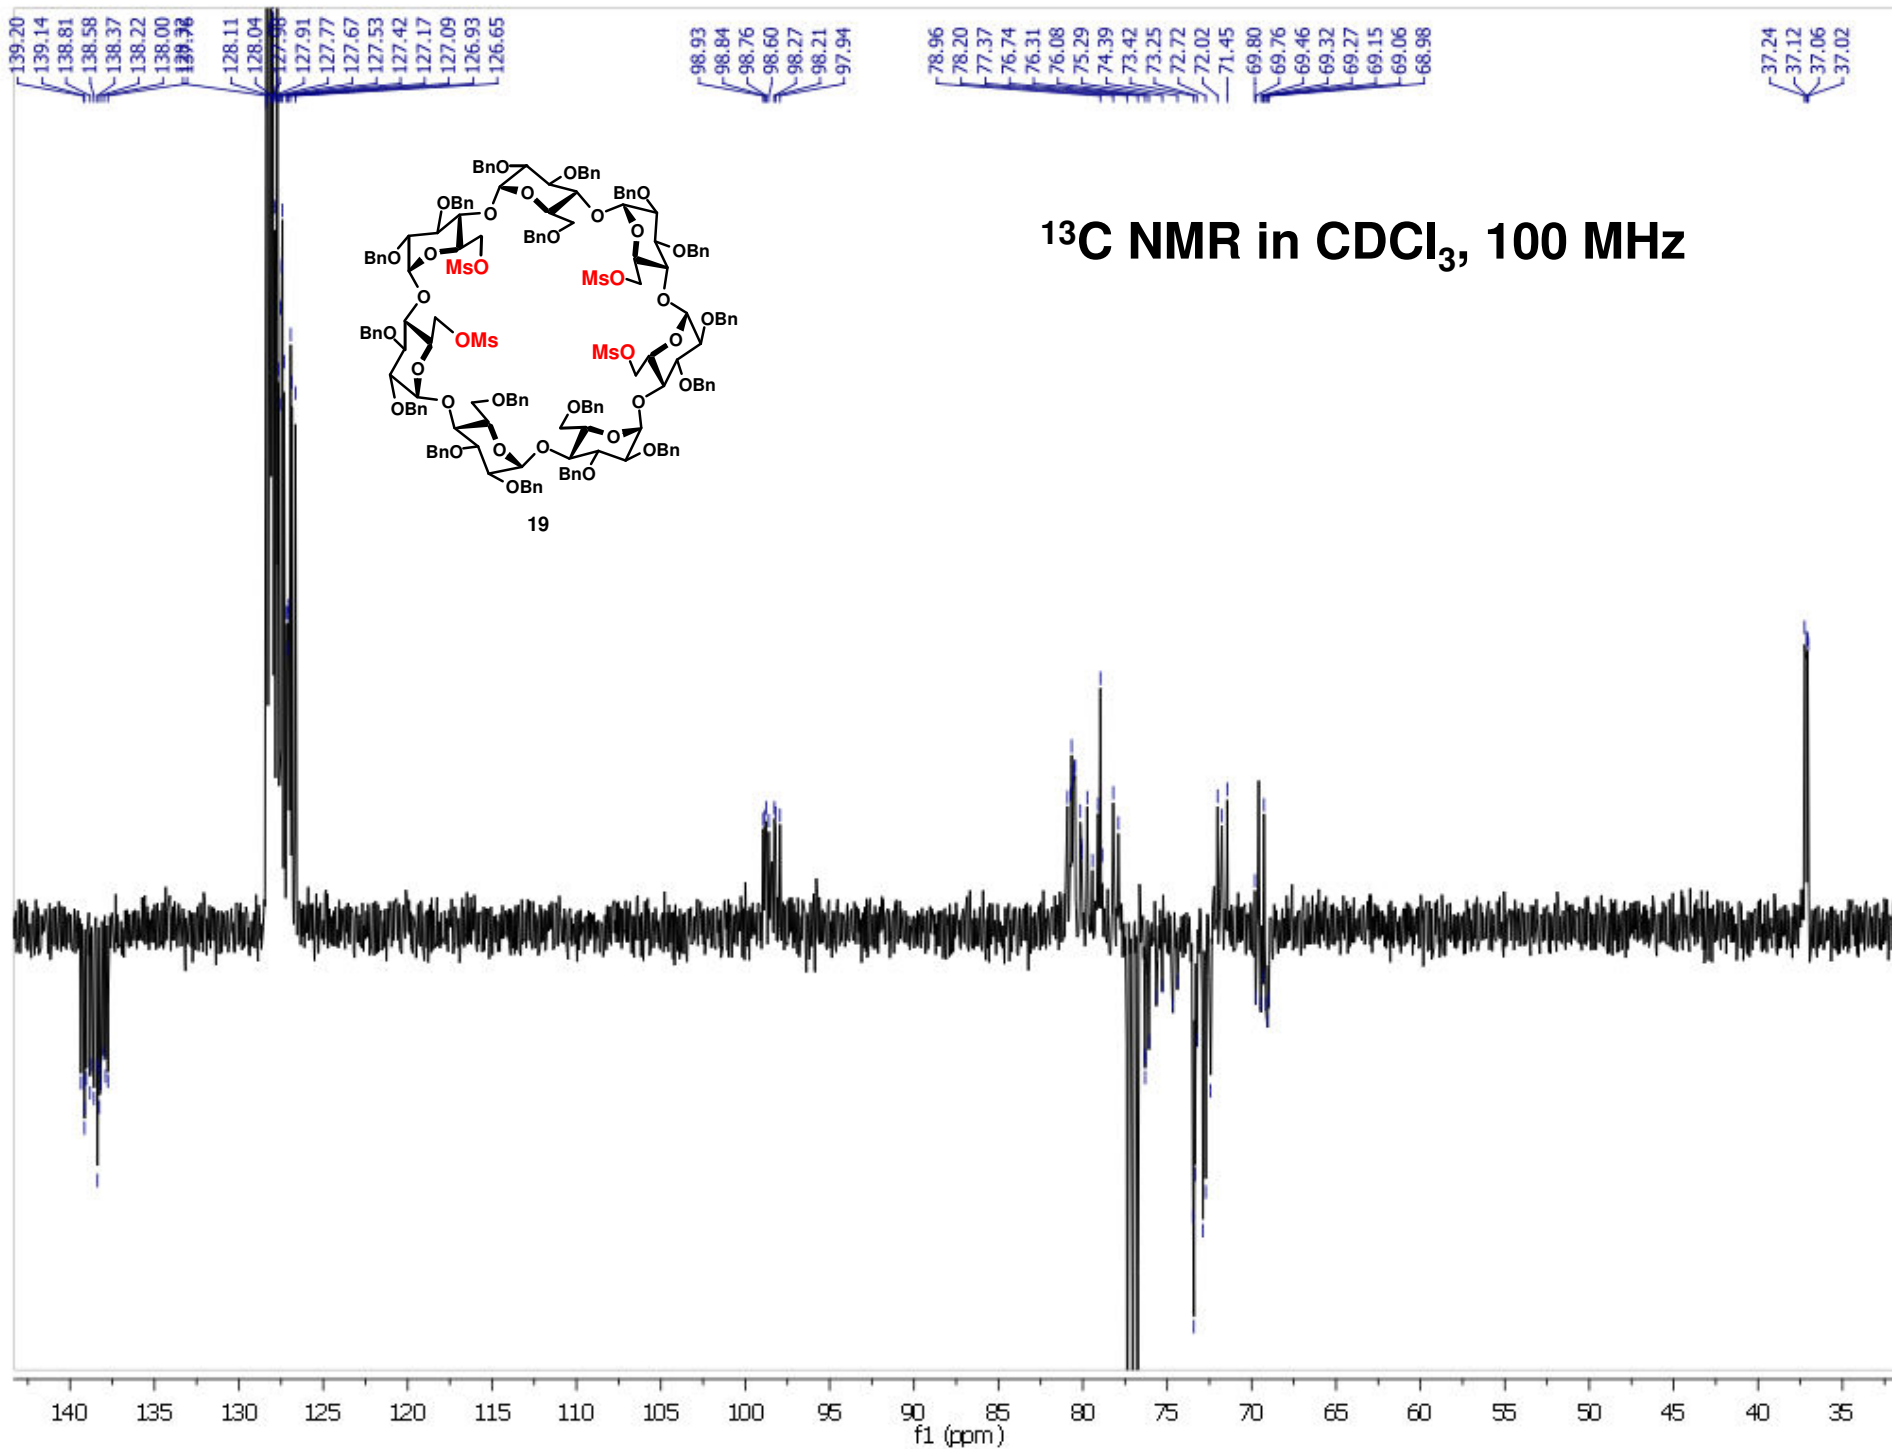



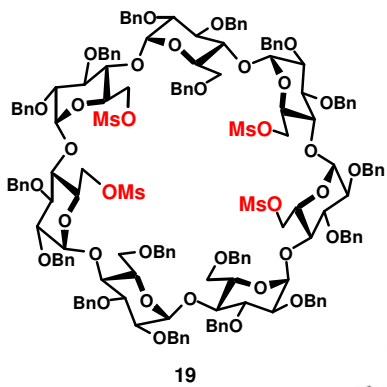

**$^1\text{H}-^1\text{H}$  COSY NMR in  $\text{CDCl}_3$ , 400 MHz**

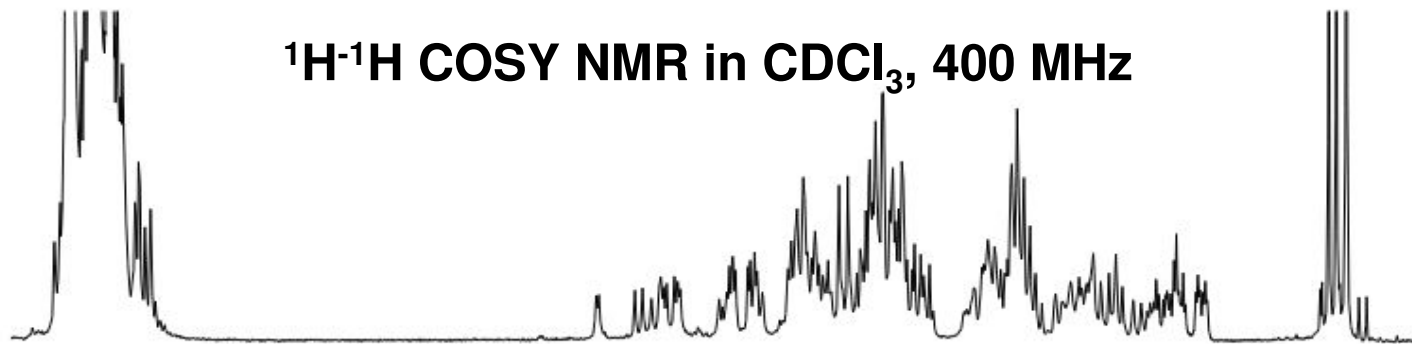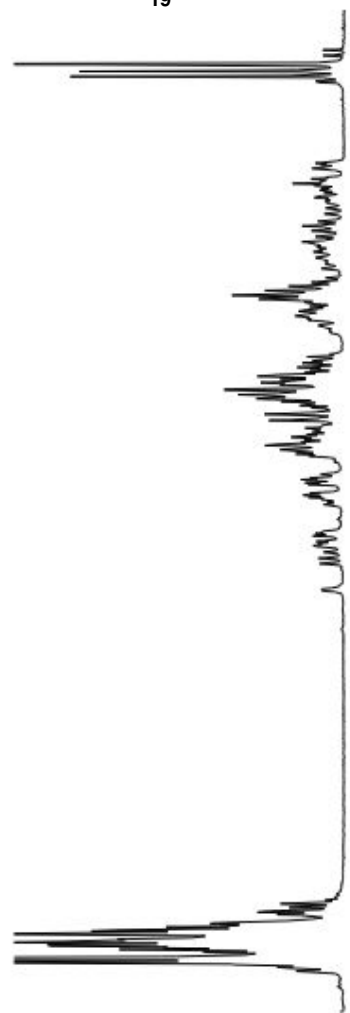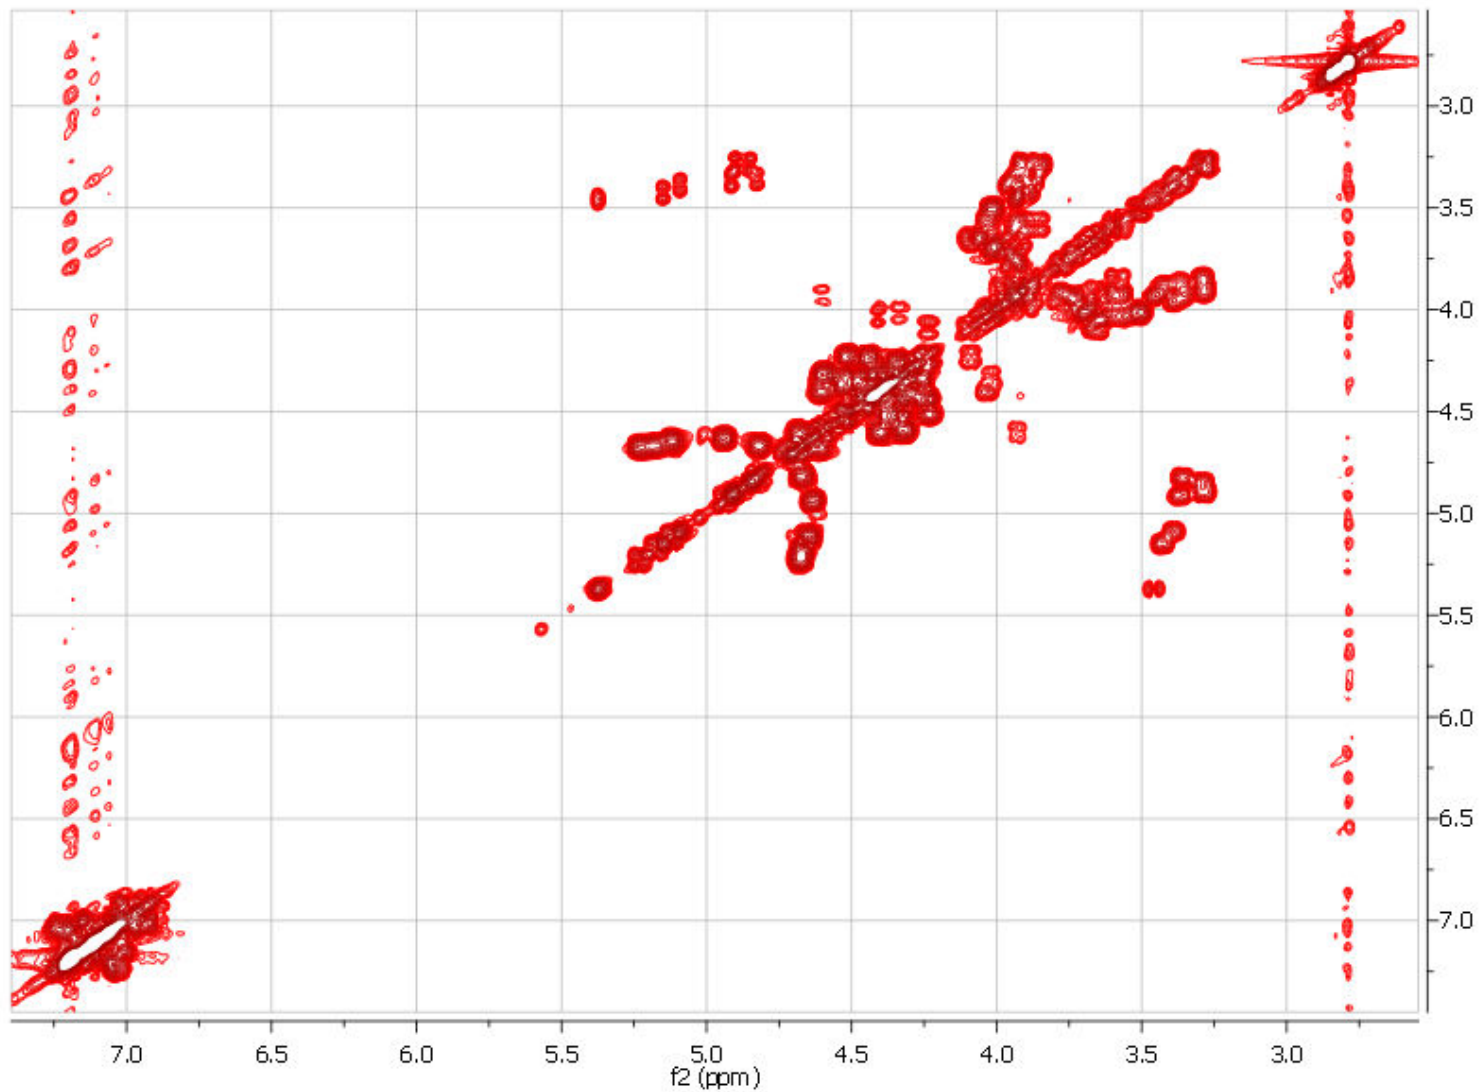

# <sup>1</sup>H NMR in CDCl<sub>3</sub>, 400 MHz

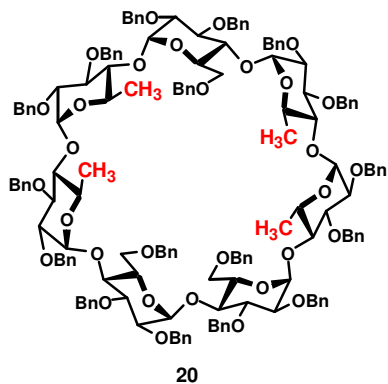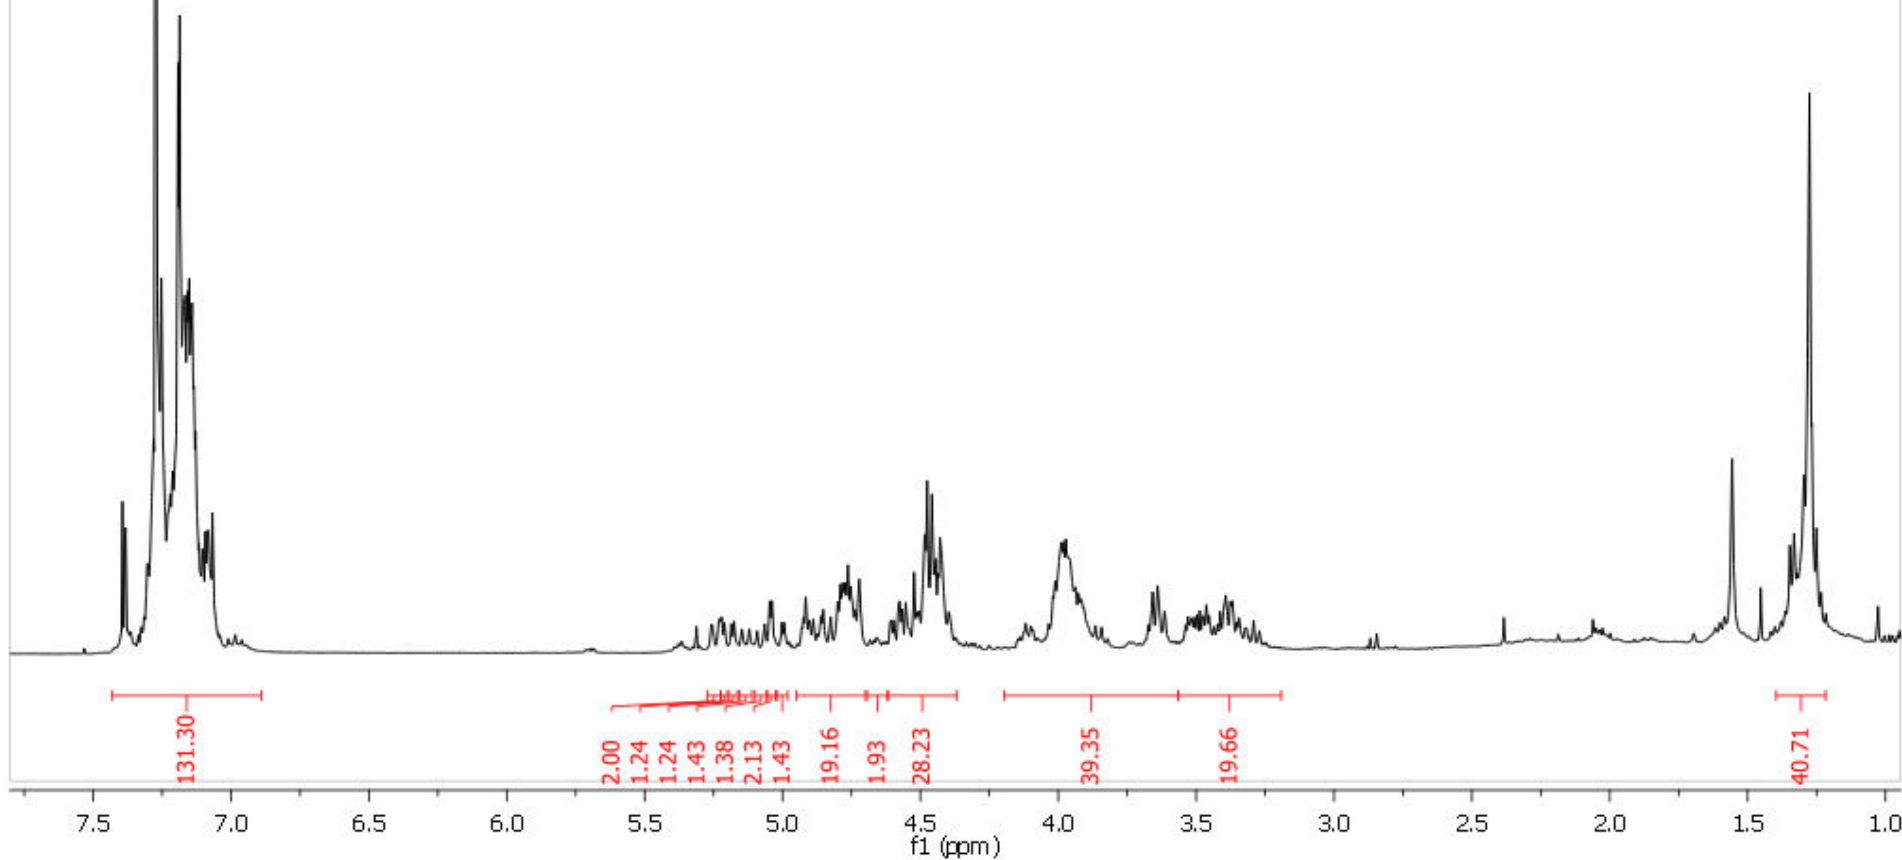

# <sup>1</sup>H NMR in Pyridine-d<sub>5</sub>, 400 MHz

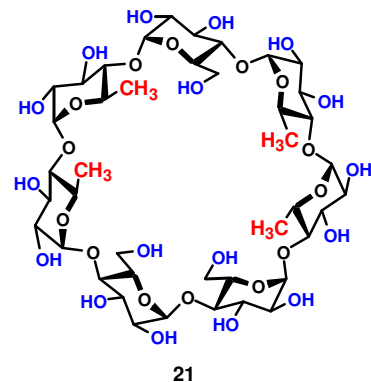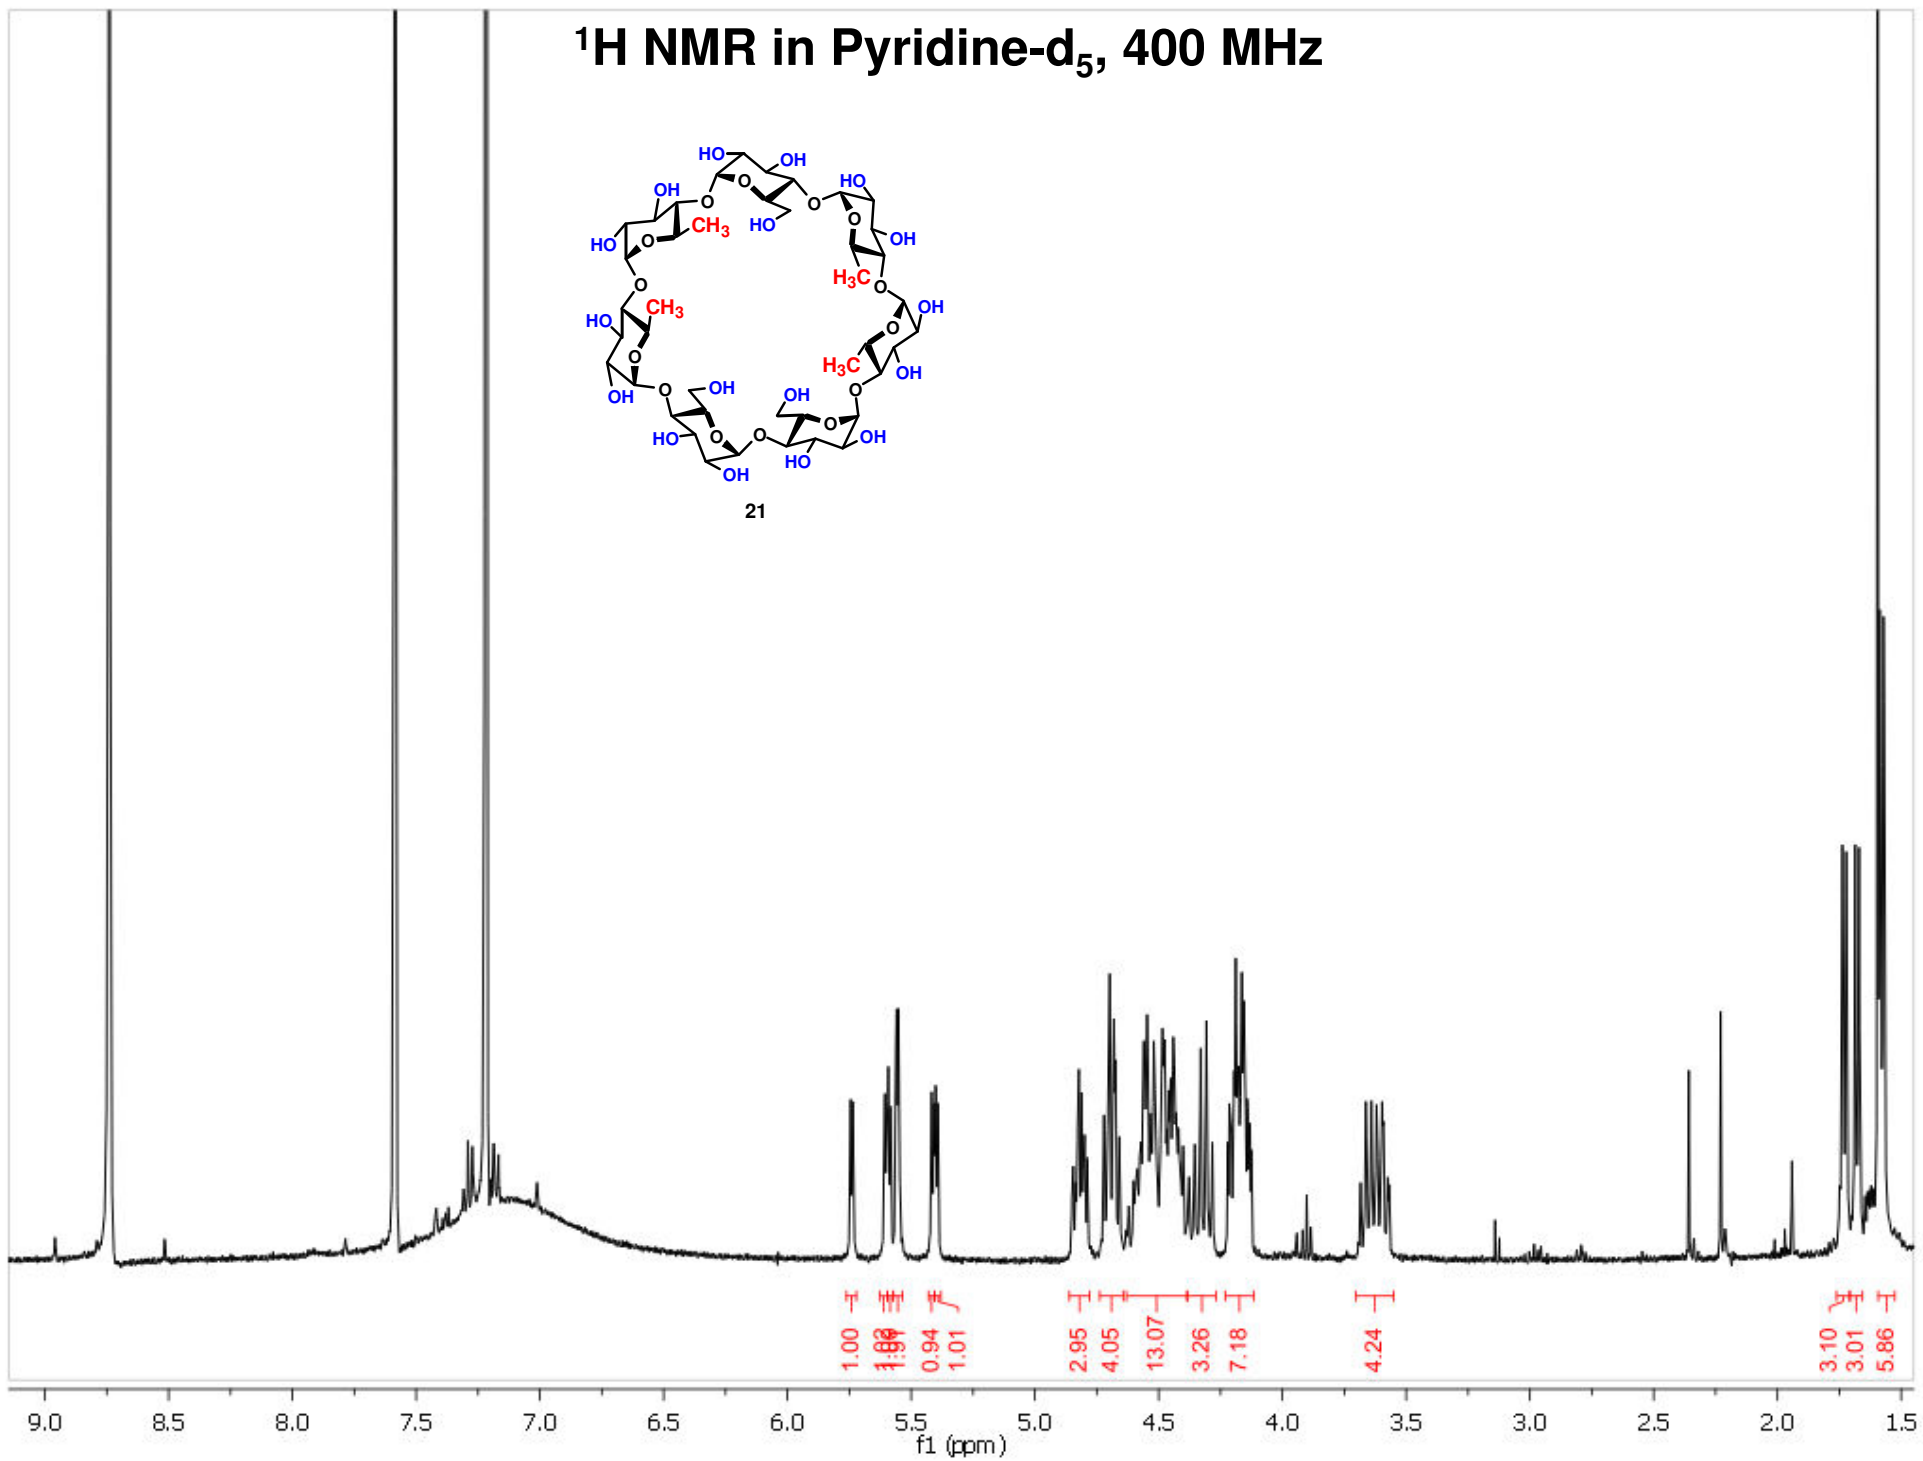

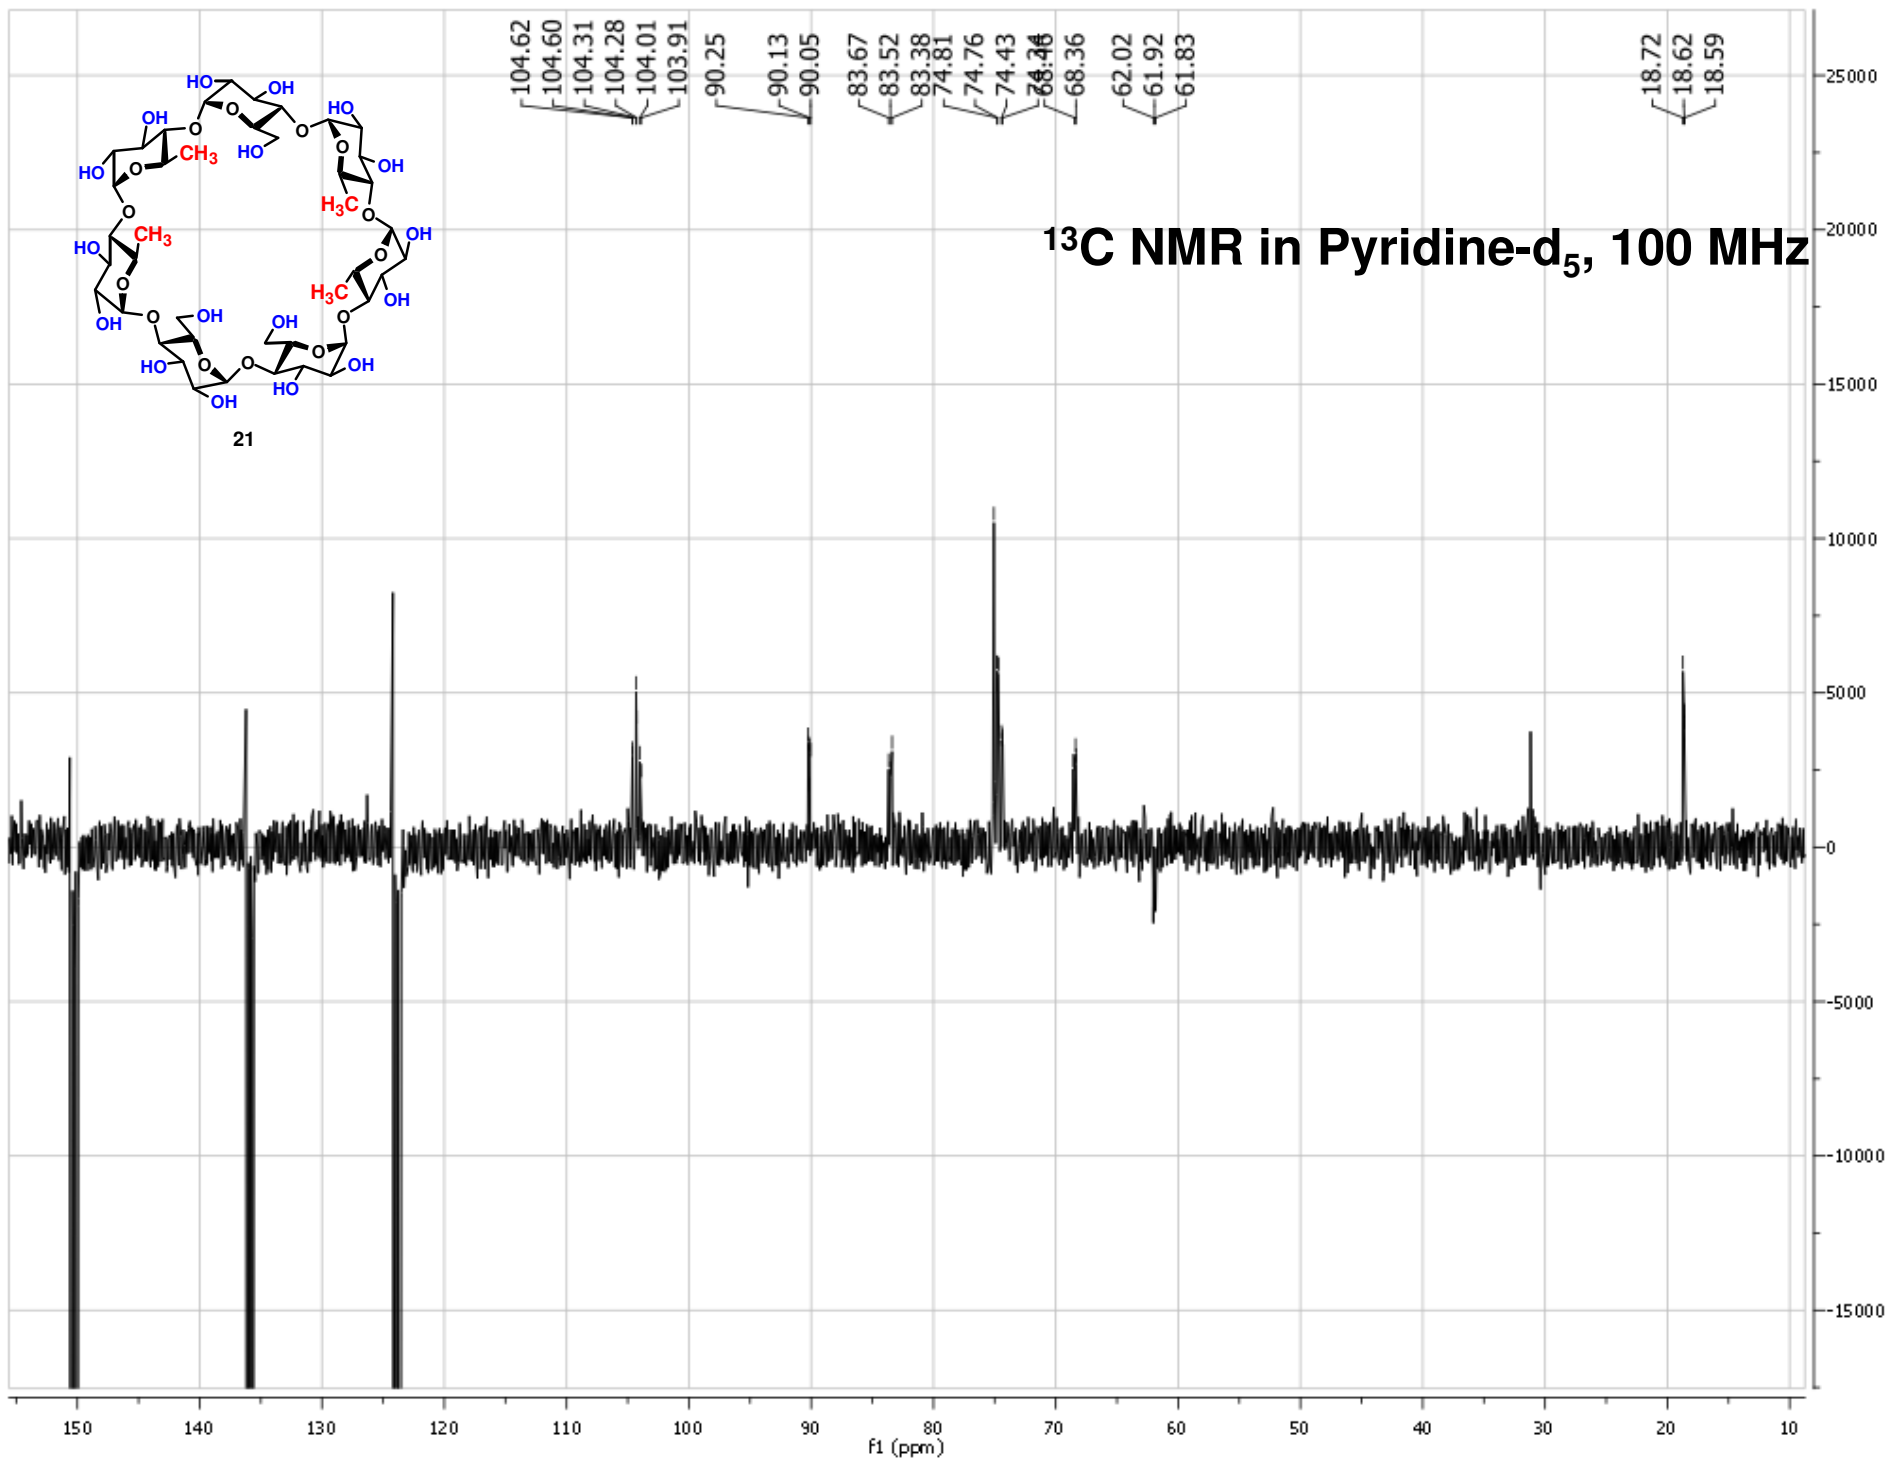

# $^1\text{H}$ - $^1\text{H}$ TOCSY NMR in Pyridine- $\text{d}_5$ , 400 MHz

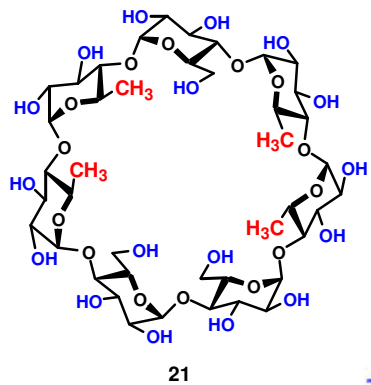

21

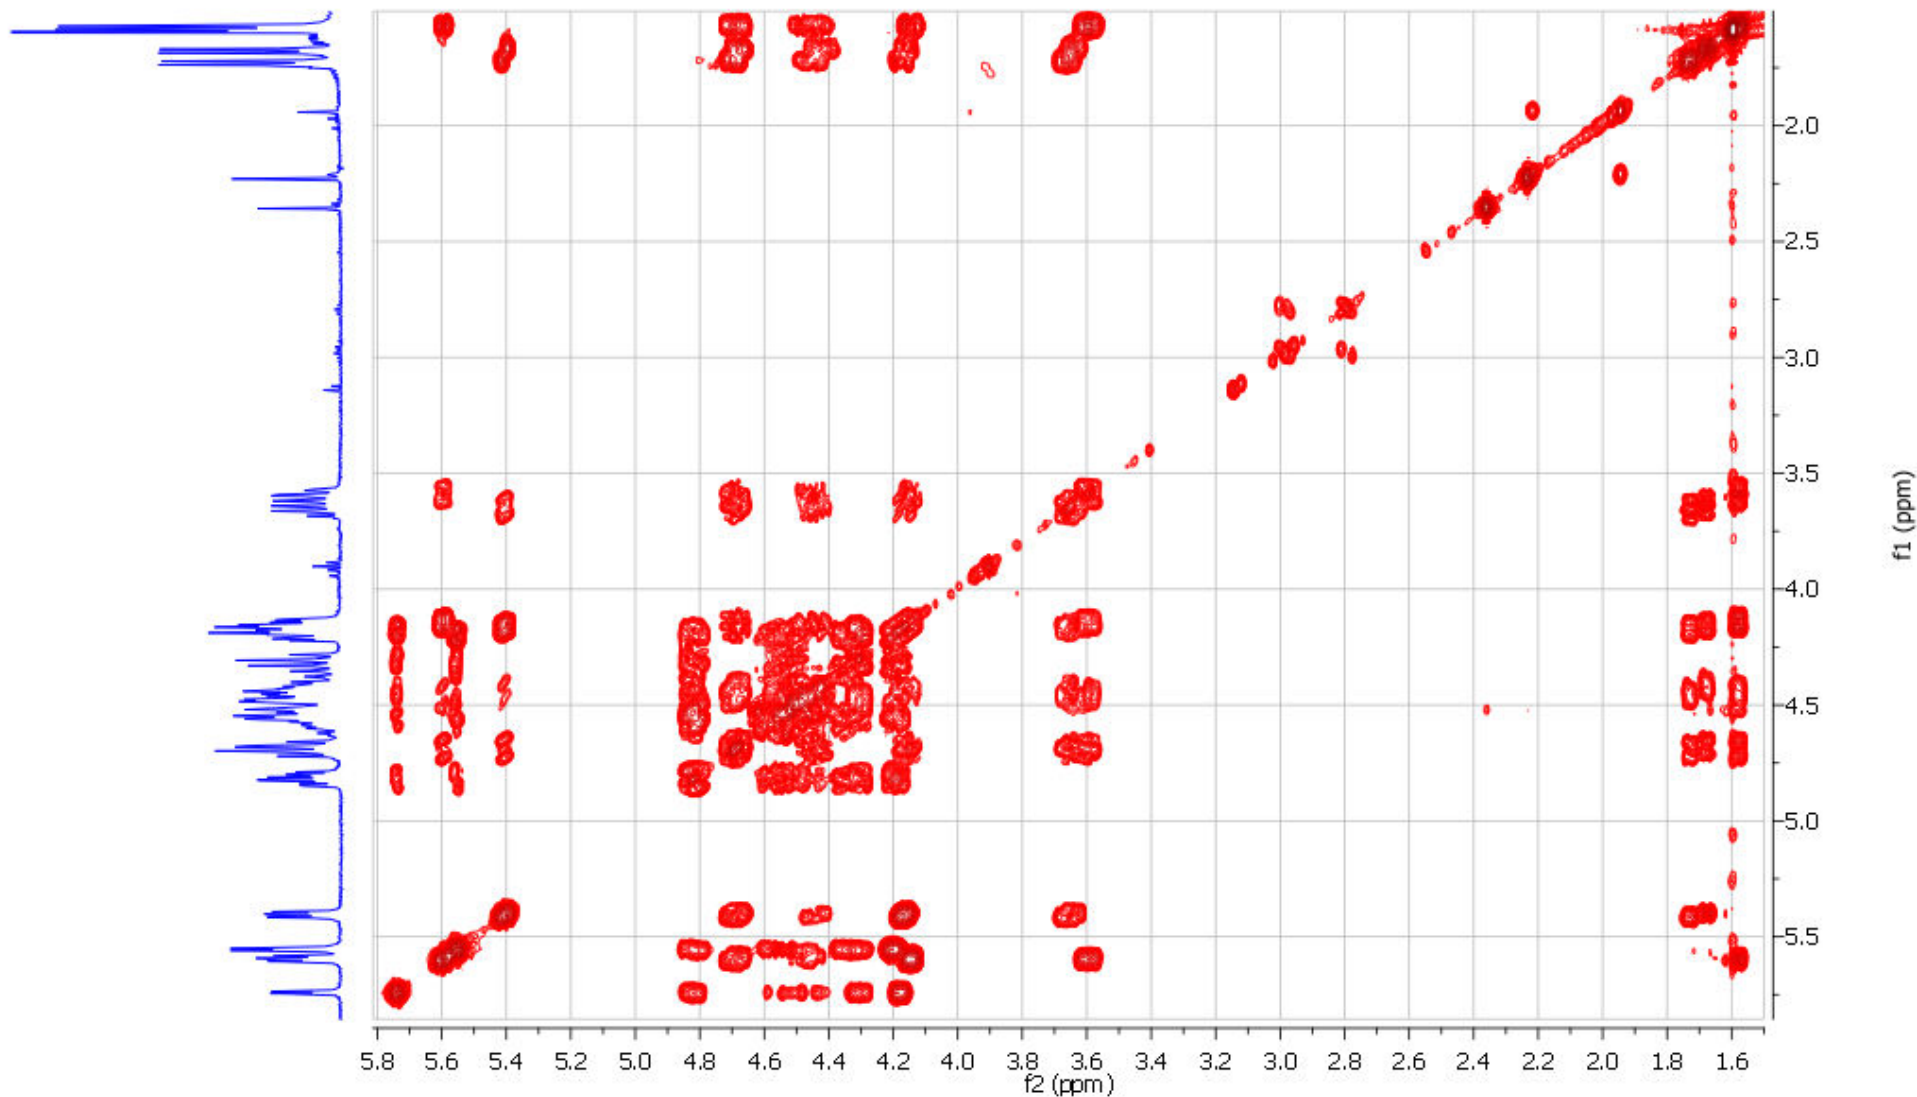

# $^1\text{H}$ - $^{13}\text{C}$ HSQC NMR in Pyridine- $\text{d}_5$ , 400 MHz

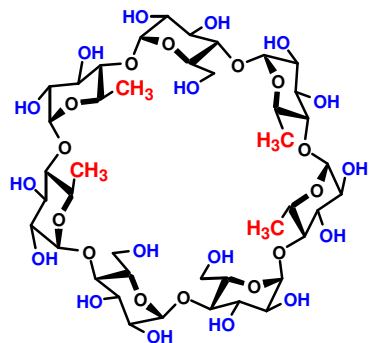

21

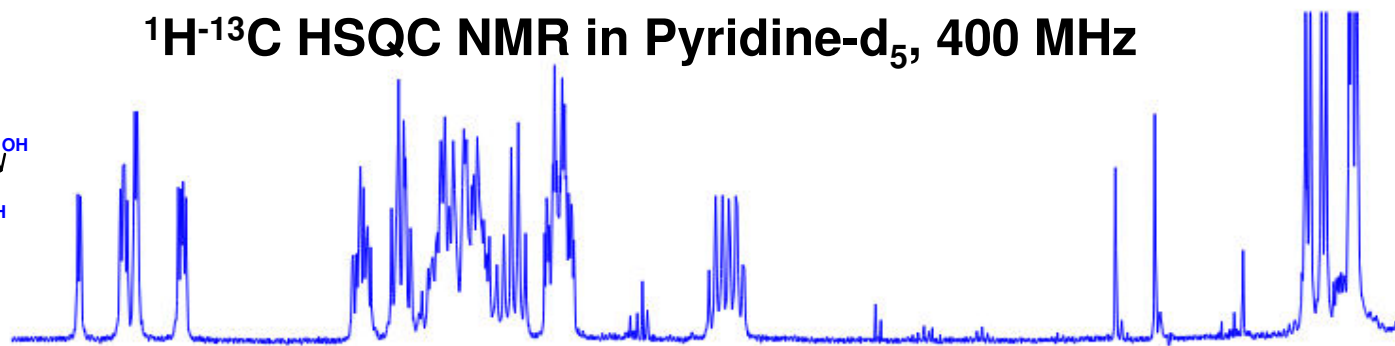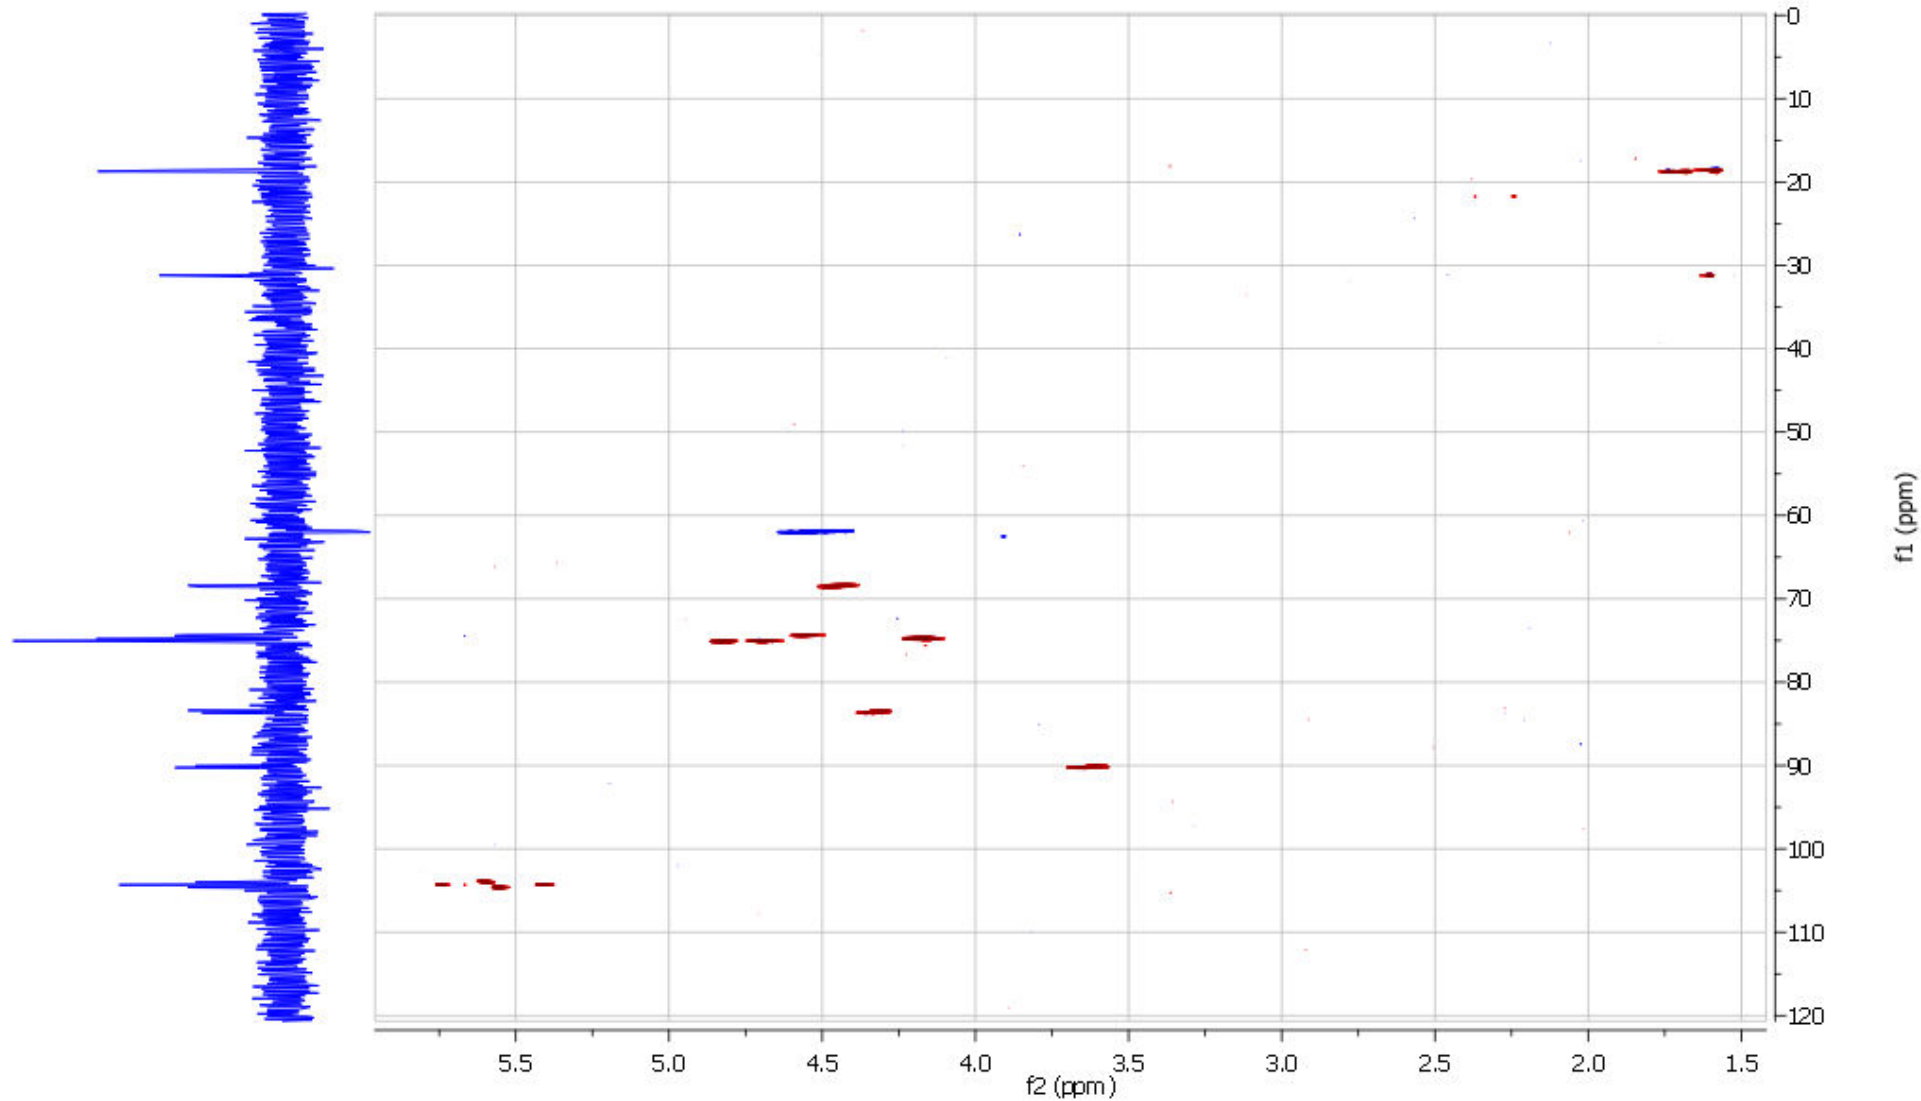



# $^1\text{H}$ NMR in $\text{CDCl}_3$ , 400 MHz

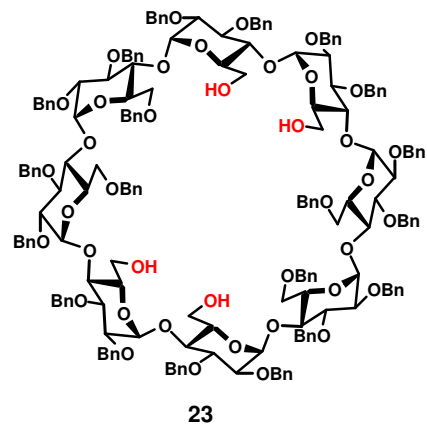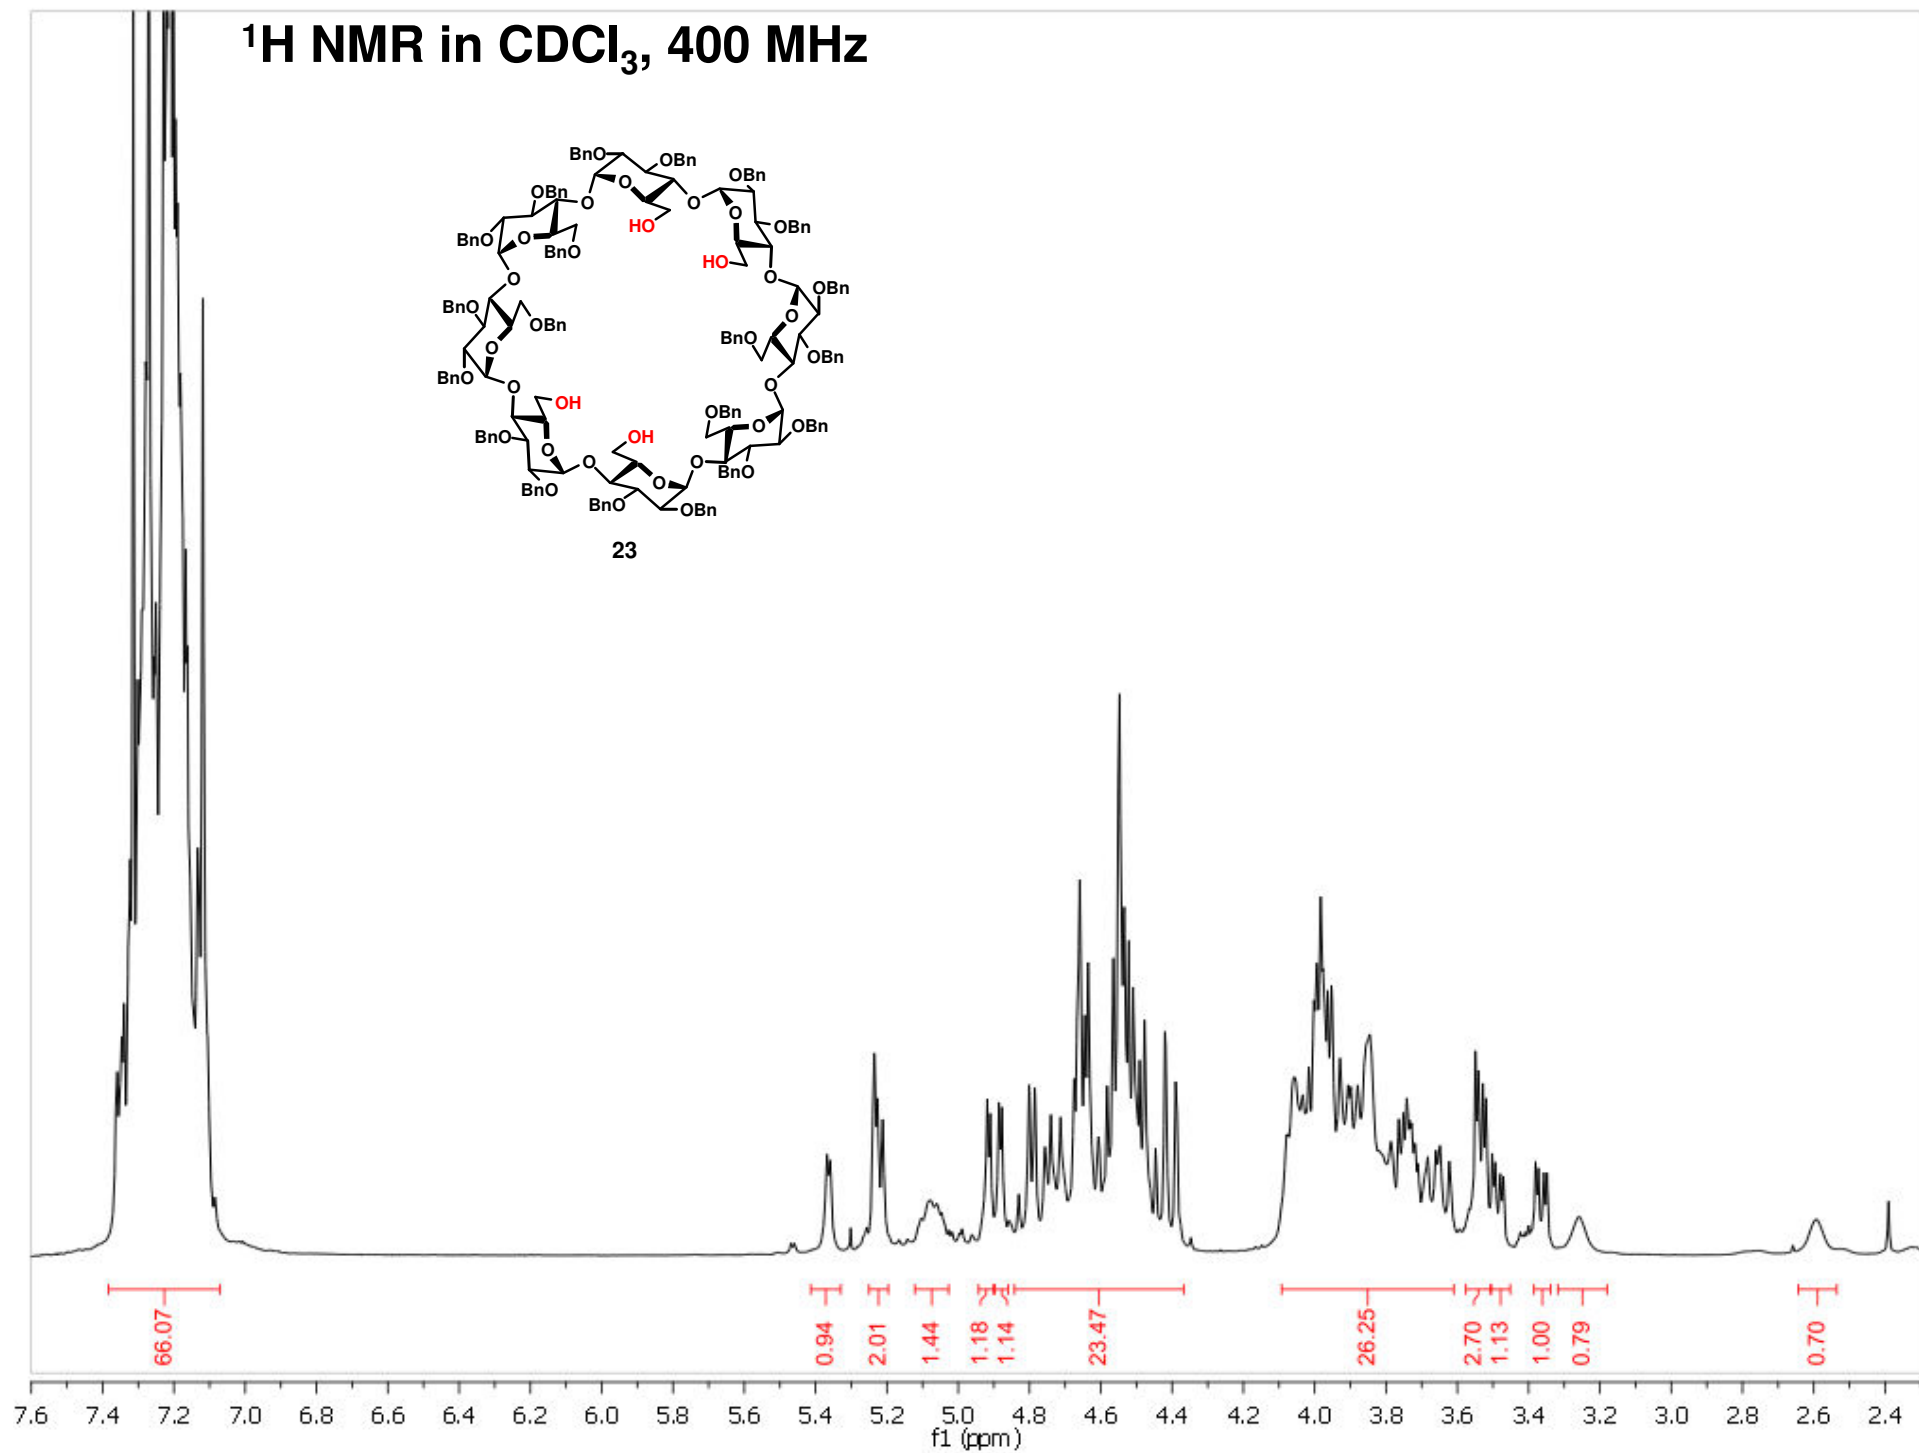

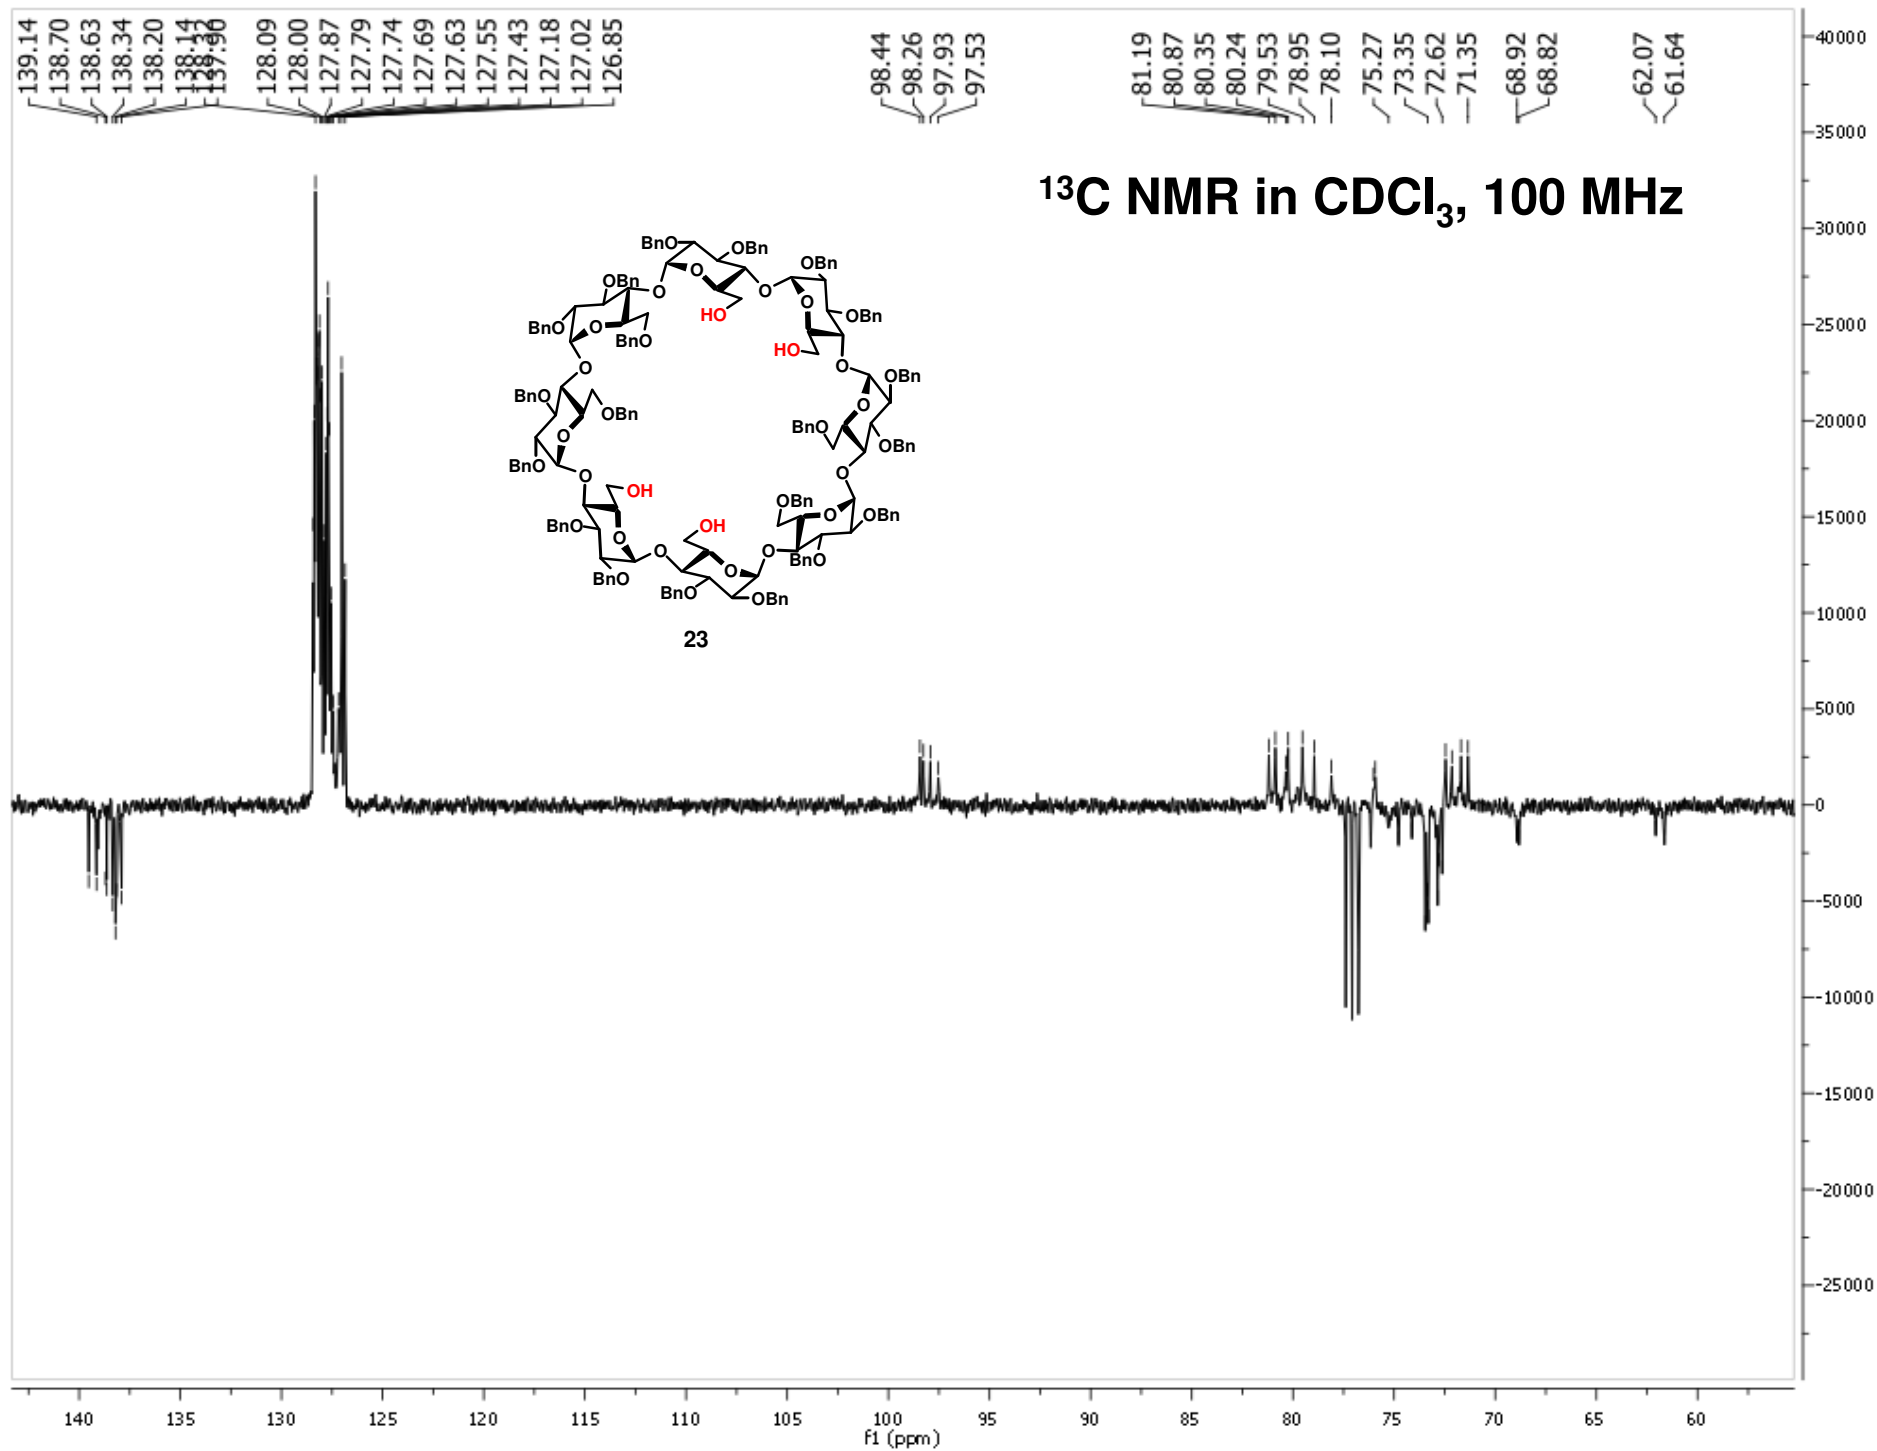

# $^1\text{H}$ NMR in $\text{CDCl}_3$ , 400 MHz

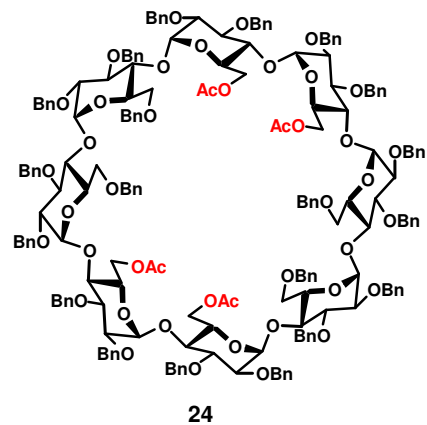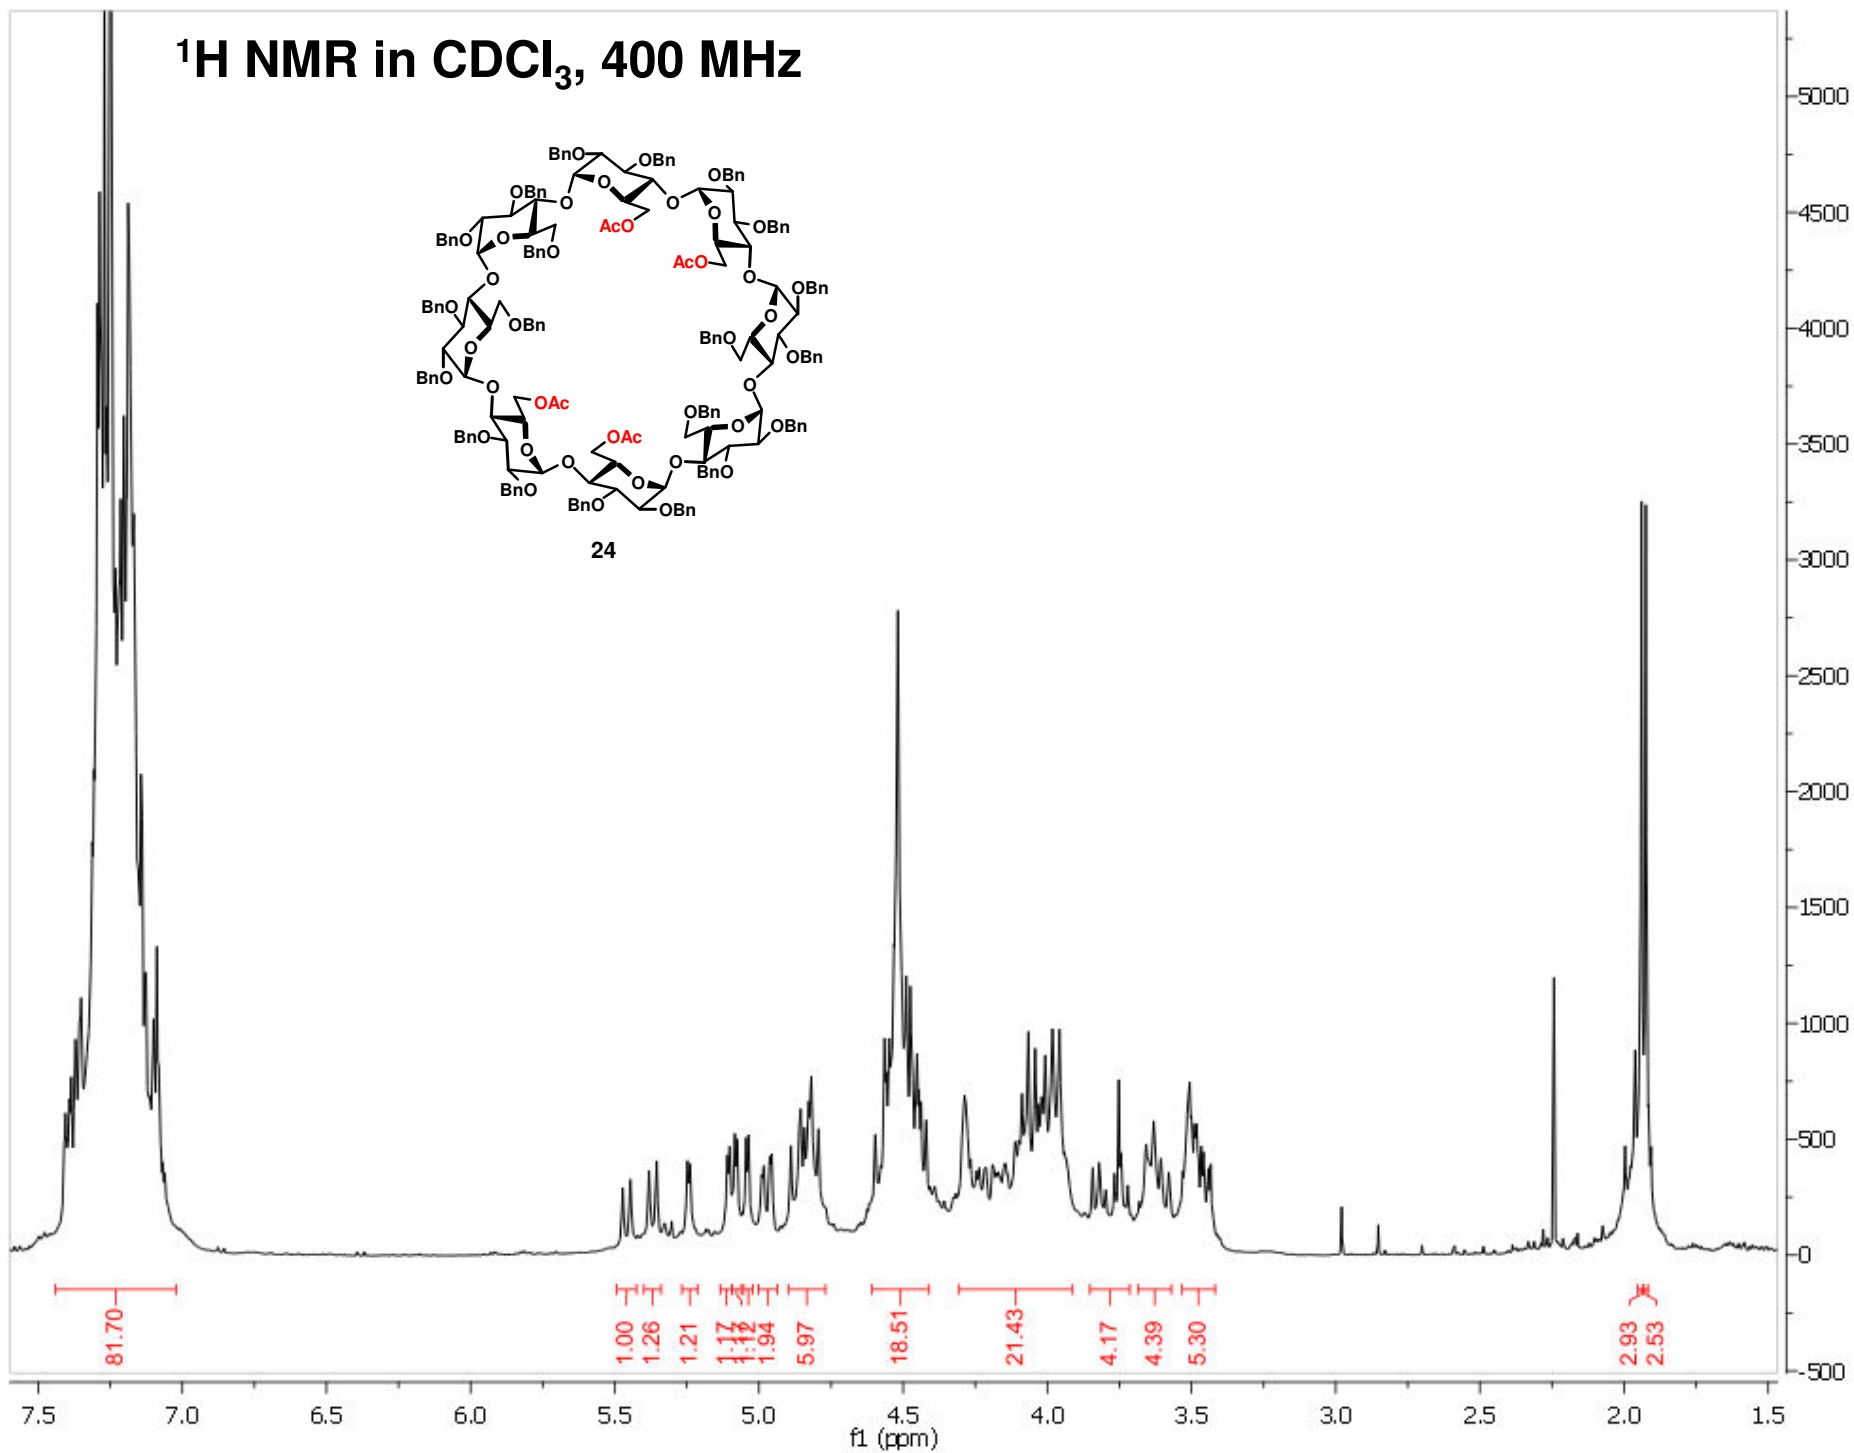

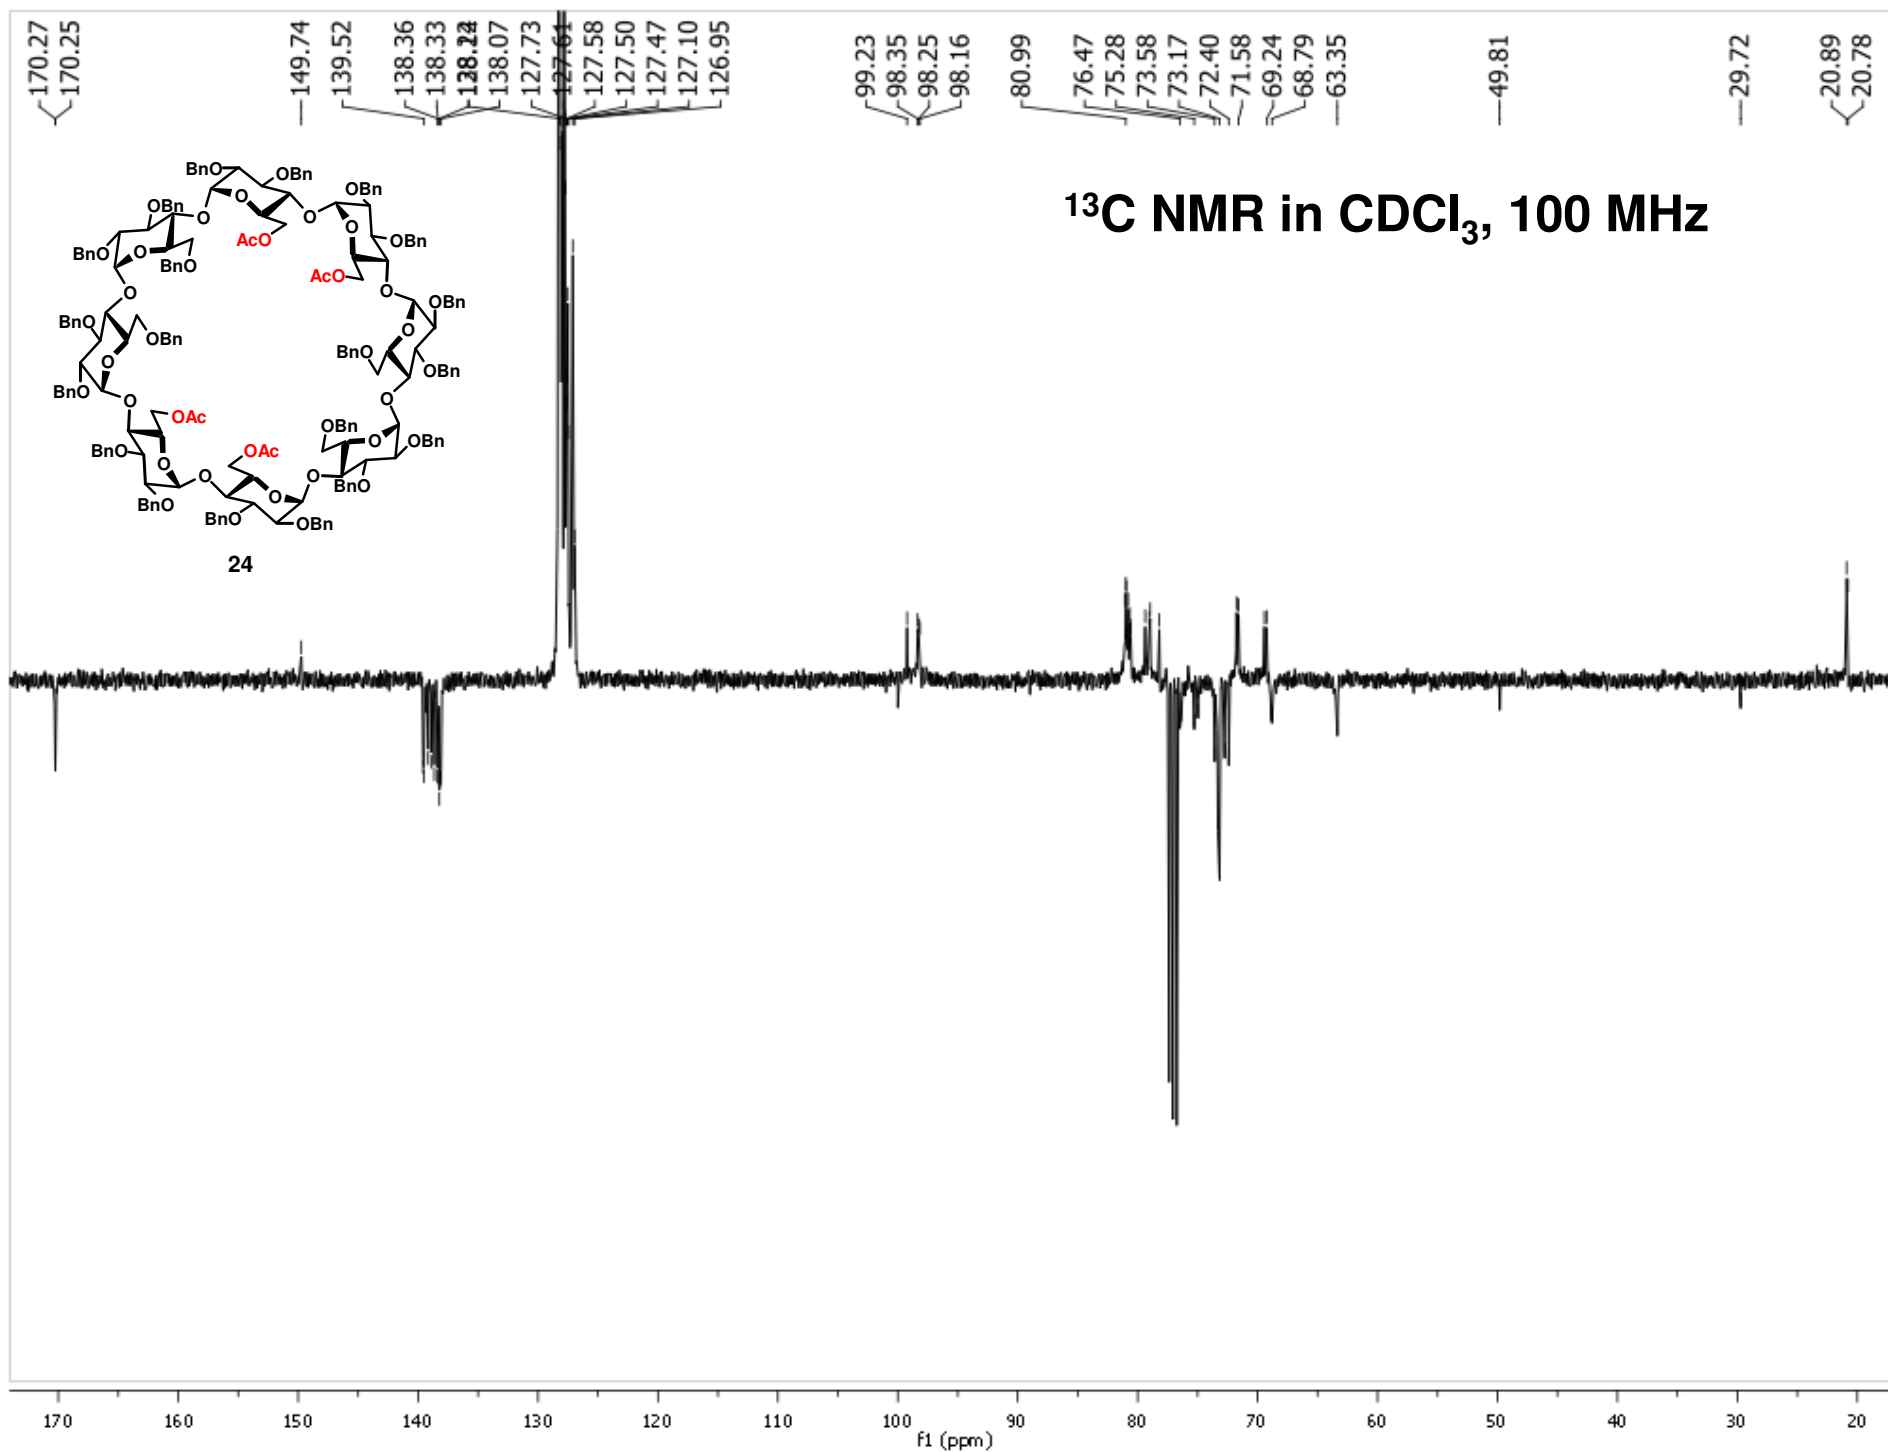

# $^1\text{H}$ - $^1\text{H}$ COSY NMR in $\text{CDCl}_3$ , 400 MHz

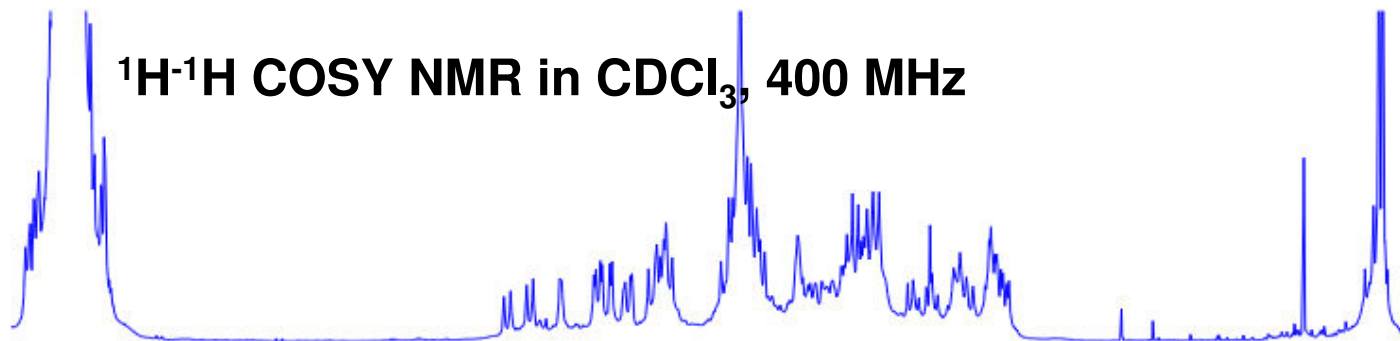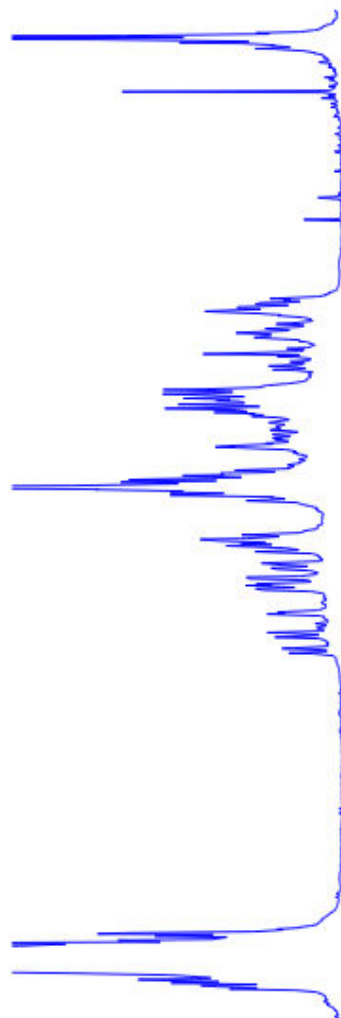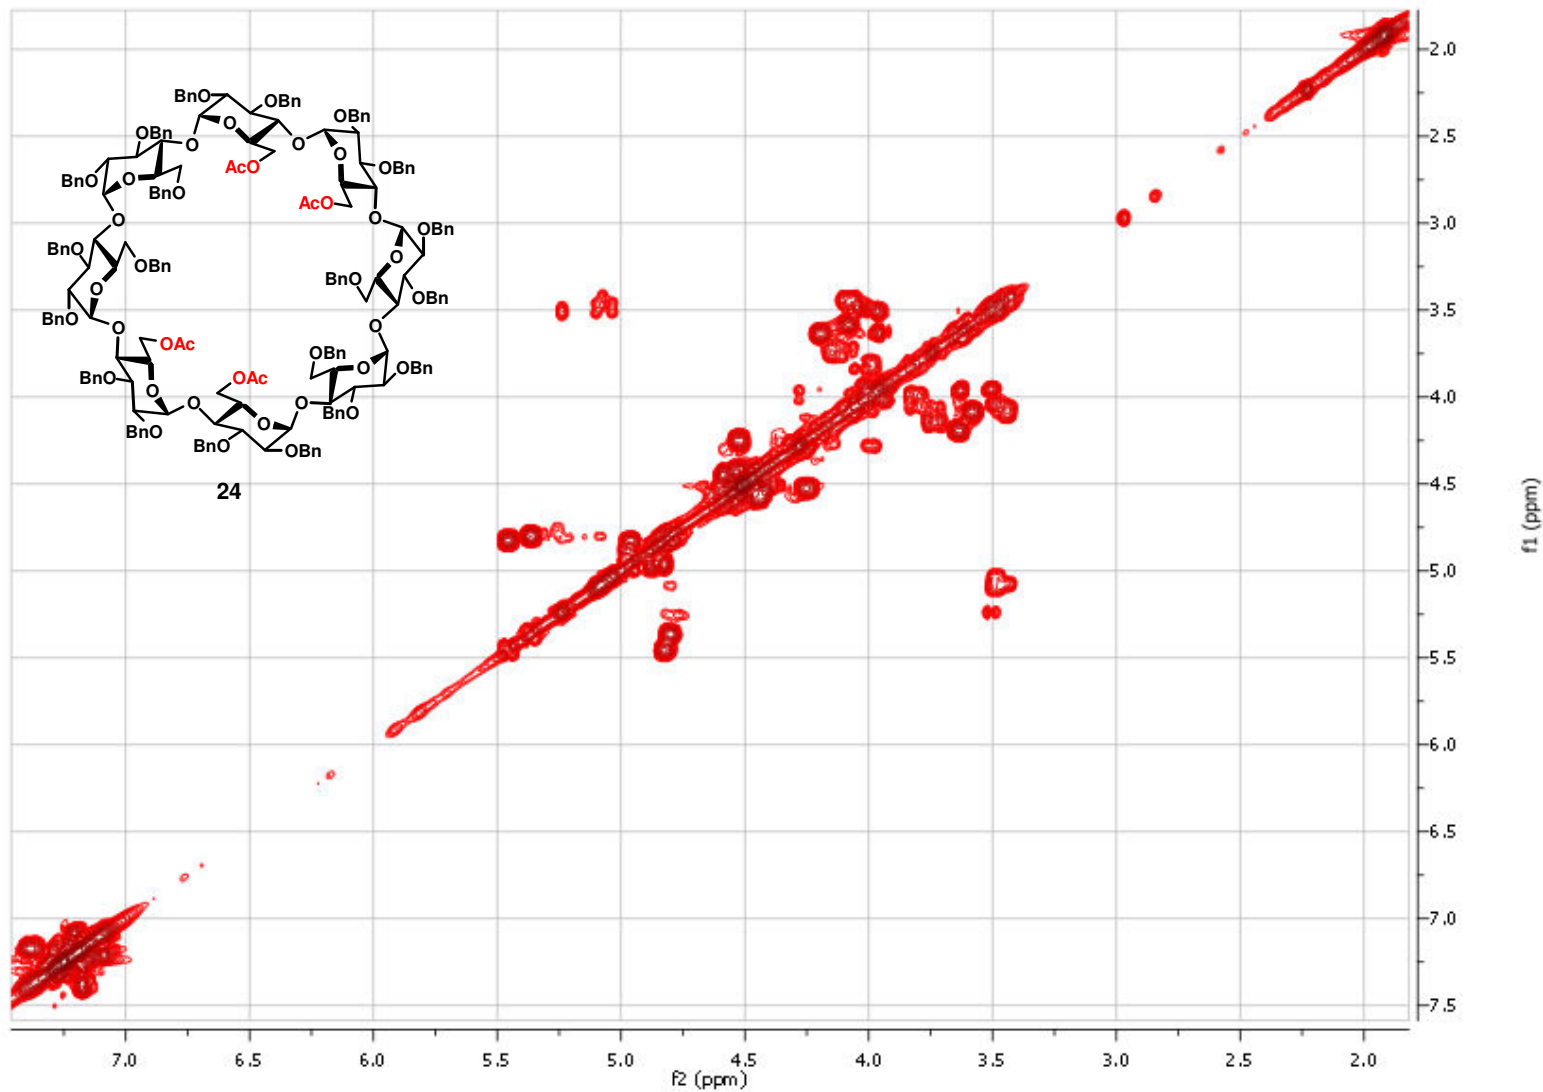

# $^1\text{H}$ - $^{13}\text{C}$ HSQC NMR in $\text{CDCl}_3$ , 400 MHz

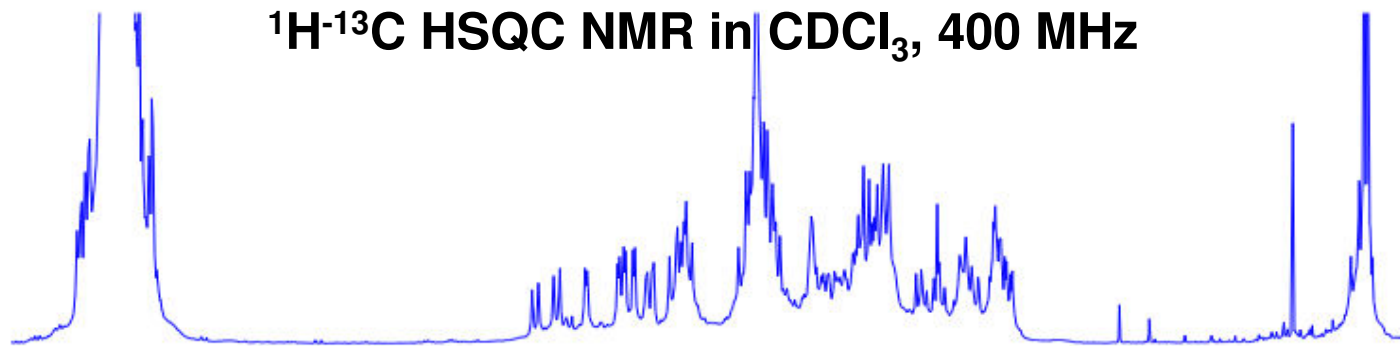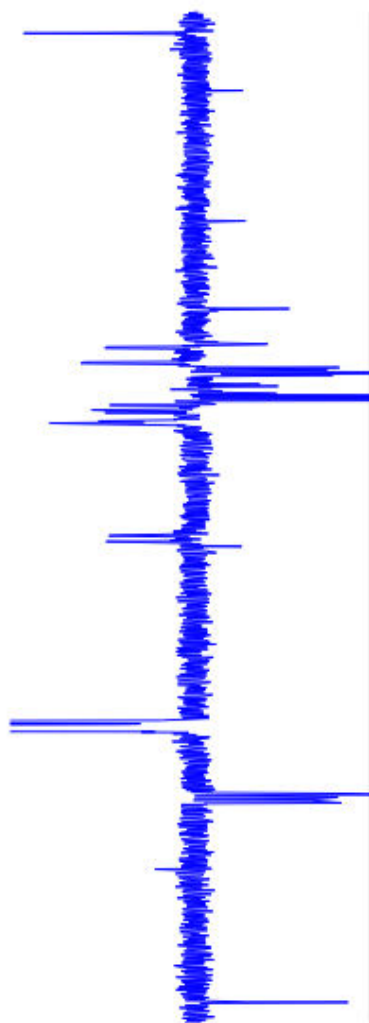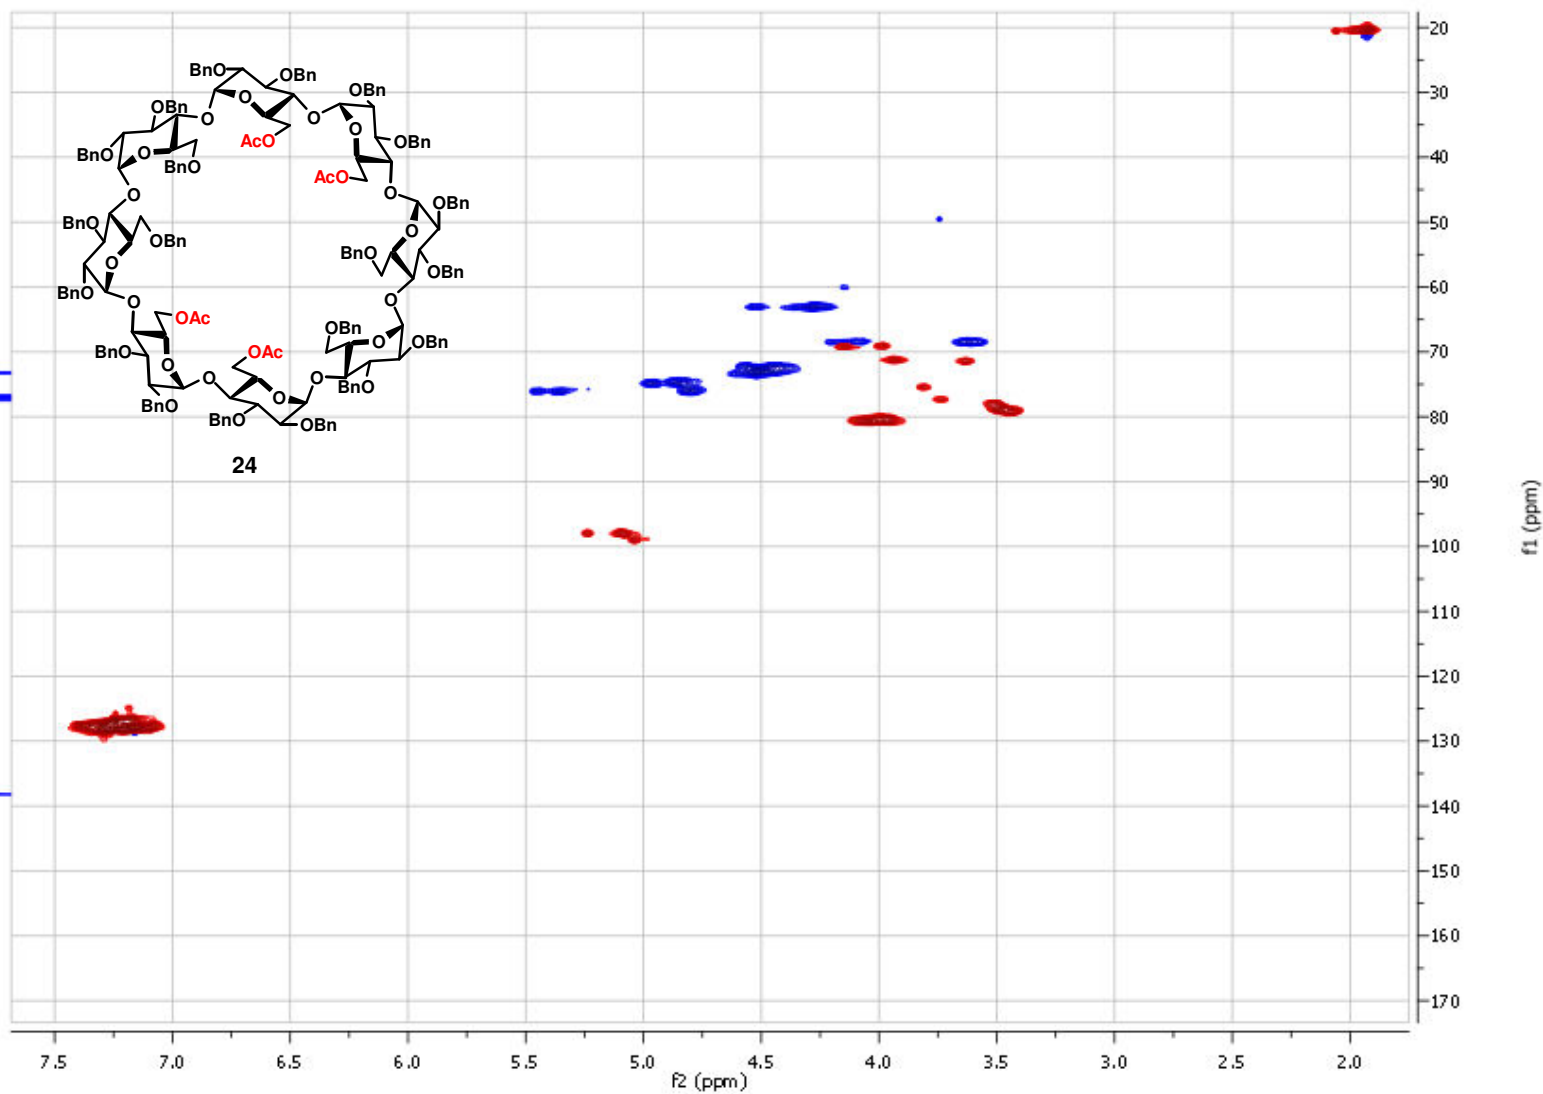

Supplement: b915450g.pdf [file b915450g.pdf]
